# Supplementary material for: Prevalence and risk factors for overweight and obesity: a cross-sectional countrywide study in Burkina Faso
Source: PubMed Central journal article supplement — BMJ Open. 2020 Nov 18;10(11):e032953. doi: 10.1136/bmjopen-2019-032953 (PMC7677366; doi:10.1136/bmjopen-2019-032953), 2020-11-18
Supplement: bmjopen-2019-032953.draft_revisions.pdf [file bmjopen-2019-032953.draft_revisions.pdf]

# BMJ Open

BMJ Open is committed to open peer review. As part of this commitment we make the peer review history of every article we publish publicly available.

When an article is published we post the peer reviewers' comments and the authors' responses online. We also post the versions of the paper that were used during peer review. These are the versions that the peer review comments apply to.

The versions of the paper that follow are the versions that were submitted during the peer review process. They are not the versions of record or the final published versions. They should not be cited or distributed as the published version of this manuscript.

BMJ Open is an open access journal and the full, final, typeset and author-corrected version of record of the manuscript is available on our site with no access controls, subscription charges or pay-per-view fees (<http://bmjopen.bmj.com>).

If you have any questions on BMJ Open's open peer review process please email [info.bmjopen@bmj.com](mailto:info.bmjopen@bmj.com)

# BMJ Open

## Prevalence and risk factors for Overweight and obesity: a cross sectional countrywide study in Burkina Faso

|                               |                                                                                                                                                                                                                                                                                                                                                                                                                                                                                                                                                                            |
|-------------------------------|----------------------------------------------------------------------------------------------------------------------------------------------------------------------------------------------------------------------------------------------------------------------------------------------------------------------------------------------------------------------------------------------------------------------------------------------------------------------------------------------------------------------------------------------------------------------------|
| Journal:                      | <i>BMJ Open</i>                                                                                                                                                                                                                                                                                                                                                                                                                                                                                                                                                            |
| Manuscript ID                 | bmjopen-2019-032953                                                                                                                                                                                                                                                                                                                                                                                                                                                                                                                                                        |
| Article Type:                 | Original research                                                                                                                                                                                                                                                                                                                                                                                                                                                                                                                                                          |
| Date Submitted by the Author: | 20-Oct-2019                                                                                                                                                                                                                                                                                                                                                                                                                                                                                                                                                                |
| Complete List of Authors:     | Kaboré, Seydou; Institut Africain de santé publique ; Ministère de la santé<br>Millogo, Tieba; Institut Africain de santé publique; Institut de Recherche en Sciences de la Sante<br>Soubeiga, Joseph; Institut Africain de santé publique; Ministère de la santé<br>Lanou, Hermann; Institut de Recherche en Sciences de la Sante; Institut Africain de santé publique<br>Bicaba, Brice; Institut Africain de santé publique; Ministère de la santé<br>Kouanda, Seni; Institut de Recherche en Sciences de la Santé (IRSS), ; Institut Africain de santé Publique (IASP), |
| Keywords:                     | nutritionnal epidemiology, EPIDEMIOLOGY, NUTRITION & DIETETICS                                                                                                                                                                                                                                                                                                                                                                                                                                                                                                             |
|                               |                                                                                                                                                                                                                                                                                                                                                                                                                                                                                                                                                                            |

SCHOLARONE™  
Manuscripts

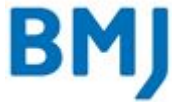

I, the Submitting Author has the right to grant and does grant on behalf of all authors of the Work (as defined in the below author licence), an exclusive licence and/or a non-exclusive licence for contributions from authors who are: i) UK Crown employees; ii) where BMJ has agreed a CC-BY licence shall apply, and/or iii) in accordance with the terms applicable for US Federal Government officers or employees acting as part of their official duties; on a worldwide, perpetual, irrevocable, royalty-free basis to BMJ Publishing Group Ltd ("BMJ") its licensees and where the relevant Journal is co-owned by BMJ to the co-owners of the Journal, to publish the Work in this journal and any other BMJ products and to exploit all rights, as set out in our [licence](#).

The Submitting Author accepts and understands that any supply made under these terms is made by BMJ to the Submitting Author unless you are acting as an employee on behalf of your employer or a postgraduate student of an affiliated institution which is paying any applicable article publishing charge ("APC") for Open Access articles. Where the Submitting Author wishes to make the Work available on an Open Access basis (and intends to pay the relevant APC), the terms of reuse of such Open Access shall be governed by a Creative Commons licence – details of these licences and which [Creative Commons](#) licence will apply to this Work are set out in our licence referred to above.

Other than as permitted in any relevant BMJ Author's Self Archiving Policies, I confirm this Work has not been accepted for publication elsewhere, is not being considered for publication elsewhere and does not duplicate material already published. I confirm all authors consent to publication of this Work and authorise the granting of this licence.

1  
2  
3 **Prevalence and risk factors for Overweight and obesity: a cross sectional**  
4 **countrywide study in Burkina Faso.**  
5  
6

7 **Authors**  
8

9 1. Seydou Kaboré, PharmD, MPH

10 Institut Africain de santé publique & Ministère de la Santé, Ouagadougou, Burkina Faso

11 [seydoupfarm@yahoo.fr](mailto:seydoupfarm@yahoo.fr)  
12

13 2. Tieba Millogo, MD, MSc, PhD (c)

14 Institut Africain de santé publique & Institut de Recherche en Sciences de la Santé,  
15 Ouagadougou, Burkina Faso

16 [millogorod@gmail.com](mailto:millogorod@gmail.com)  
17

18 3. Joseph Kouesyandé Soubeiga, MD, MPH

19 Ministère de la Santé, Ouagadougou, Burkina Faso

20 [ksoubeiga@yahoo.fr](mailto:ksoubeiga@yahoo.fr)  
21

22 4. Hermann Lanou, MD, MSc, PhD (c)

23 Institut Africain de santé publique & Institut de Recherche en Sciences de la Santé,  
24 Ouagadougou, Burkina Faso

25 [hlanou@yahoo.ca](mailto:hlanou@yahoo.ca)  
26

27 5. Brice W Bicaba , MD, MPH.

28 Ministry of Health, Burkina Faso

29 [bicaba\\_brico@yahoo.fr](mailto:bicaba_brico@yahoo.fr)  
30

31 6. Seni Kouanda, MD, MSc., PhD

32 Institut Africain de santé publique & Institut de Recherche en Sciences de la Santé,  
33 Ouagadougou, Burkina Faso

34 [skouanda@irss.bf](mailto:skouanda@irss.bf)  
35

36 **Corresponding Author**  
37

38 Seni Kouanda

39 [skouanda@irss.bf](mailto:skouanda@irss.bf)  
40

41 Institut Africain de santé publique, Deputy Director

42 PBox: 12 BP 199 Ouagadougou

43 Tel: (+226) 70261462  
44

45 **Word count:** 2515  
46

47 **Keywords:** Obesity, epidemiology of non-communicable disease, developing countries  
48  
49  
50  
51  
52  
53  
54  
55  
56  
57  
58  
59  
60

## Abstract

**Objective:** The objective of this study was to determine the prevalence and predictors of overweight and obesity in Burkina Faso using a population-based country-wide sample. We hypothesize that obesity is increasingly becoming a public health issue in low income settings like Burkina Faso.

**Design:** Secondary analysis of a population-based country wide cross-sectional study

**Setting:** Burkina Faso, all the 13 regions including both rural and urban residential areas

**Participants:** 4,800 participants of both sexes, aged between 15 and 64 years.

**Main outcomes:** overweight and obesity using body mass index cut-off levels of WHO

**Results:** The prevalence of overweight and obesity in Burkina Faso were 13.82% (CI95%: 12.25 - 15.55) and 4.84% (CI95%:3.99 - 5.86) respectively. Among men, the proportional odds of overweight / obesity increase with urban residency ( $p<0.001$ ), greater age ( $p<0.002$ ), marital status different from single ( $p\leq 0.007$ ) and decrease with current smoking ( $p=0.009$ ). Among women, the proportional odds of overweight / obesity increase with urban residency ( $p<0.001$ ), primary educational level ( $P=0.01$ ), high total blood cholesterol level ( $p<0.001$ ), high fasting blood glucose level ( $p=0.02$ ), and decrease with current smoking ( $p<0.001$ ).

### Conclusion:

Our study showed that nearly one person out of five in the adult population of Burkina has an abnormal weight status with women more affected than men. Thus, overnutrition needs to be recognized as an important public health issue. The country is witnessing the double burden of malnutrition with the coexistence of overnutrition and undernutrition. Nutrition interventions need to be reshaped to account for this epidemiological picture of malnutrition in Burkina Faso.

## Strengths and limitations

### *Strengths*

- To our best knowledge, this is the first nationwide study on obesity and overweight in Burkina Faso with a country level representative sample.
- Outcomes measurements were carried out following international standards through the WHO STEPwise approach to NCDs measurement and prevention.
- We report here a significant burden of overweight and obesity in the adult population of Burkina Faso, confirming that the country is facing the double burden of nutrition: coexistence of malnutrition in children and obesity/overweight in adults. This has an important implication for health policies that must henceforth take into account this double burden.

### *Limitations*

- When interpreting the results of this study, one should bear in mind that this is a cross sectional study. Thus, our ability to derive causal inference from the reported data is weak.
- Overweight or pre-obese is an abnormal status that may evolve towards obesity. However, we don't have data showing that the evolution will be necessary in that direction. It may be also that an overweight person will turn to be normal in the future, particularly in a setting where food security is common.

## Introduction

Obesity is defined as an abnormal or excessive accumulation of body fat, due to an energy imbalance between intake and expenditure [1]. It is a major risk factor for many non-communicable diseases (NCD) and a real public health threat in the world[2,3]. In 2012, NCDs accounted for 68% of all deaths worldwide [4].

Obesity, a well-known phenomenon in developed countries, is increasingly common in developing countries, affecting both children and adults [1,2]. Out of all World Health Organization (WHO) regions, the American's Region was the most affected with a prevalence of 27%; the least affected region was South-East Asia (5%). In the Africa region, the proportion of obese people was about 6% among men and 15% among women [4]. Thus, in low- and middle-income countries, the association of overweight / obesity with one or more nutritional deficiencies is often observed, especially among women, known as double burden of malnutrition [5]. However, data from the literature reports that excess weight can largely be avoided; and prevention involves the identification and control of modifiable risk factors[1,2]. These factors are known and described in the literature. These factors are essentially factors related to behavior and / or knowledge (inadequate diet, inactivity, alcohol consumption), sociodemographic factors (place of residence, socio-economic status), and clinical and metabolic factors ( total cholesterol level, HDL, triglycerides) [1,6–8].

However, these factors vary between countries, depending on eating habits and socio-cultural practices [2] . This variability of factors suggests that each country identifies the risk factors that are specific to its context in order to better guide its policies and strategies to address the raising burden of obesity.

Most of the studies conducted so far on factors associated with overweight or obesity in developing countries were often conducted in urban areas[9–13], hospitals[14,15], secondary and high schools [16–18]. There are few nationally representative data on obesity in most sub-Saharan African countries[6,19]. The poor awareness of the burden and risk factors for obesity among the population is an obstacle to engaging countries in the design and implementation of adequate public health interventions.

Our study intends to fill this gap by providing more complete data on the prevalence and the risk factors for overweight and obesity, through a secondary analysis of data from the STEPS survey carried out in Burkina Faso in 2013.

## Methods

### *Study setting*

Our study was conducted in Burkina Faso, a landlocked Sahelian country in the heart of West Africa. The country is divided into 13 regions, 45 provinces and 351 municipalities. In 2013, the population was estimated at 17,271,583 inhabitants. The majority of the population lives in rural areas, with agriculture and livestock as main activities[20].

In terms of health, the country is still facing endemic-epidemic diseases, especially malaria, measles, cerebro-spinal meningitis, acute respiratory infections, diarrheal diseases and HIV / AIDS infection[21]. The prevalence of acute malnutrition was estimated at 8.2% in 2014[22].

Mortality due to non-communicable diseases is increasing rapidly; it was estimated that 32% of all death cases were due to NCD in 2014[23].

### *Type of study*

We carried out an analytical cross-sectional study consisting of a secondary analysis of the data from the 2013 STEPS survey in Burkina Faso.

### *Study population*

The study population of the survey was composed of adults of 25 to 64-year-old who have been living in the national territory for at least six (6) months before the survey. Persons with an inability to answer questions (cognitive impairment) were excluded from the primary study. Pregnant women were excluded from our analysis.

### **Sampling**

The enumeration areas (EAs) from the 2006 General Population and Housing Census, updated in 2010 during the Demographic and Health Survey conducted in Burkina Faso (EDS-BF, 2010) were used as a sampling frame. The STEPS survey was carried out on a nationally representative sample of 4800 households with 20 households per EAs, giving 240 EAs for the whole country. The sample was stratified in each of the 13 administrative regions to provide an adequate representation of the urban and rural areas. This stratification took into account the



1  
2  
3 distribution of the population depending on the urban (22.7%) and rural environment (77.3%)  
4 in Burkina Faso, giving 54 EAs for urban area and 186 EAs for rural areas across the country.  
5 Within each stratum, a three-stage cluster sampling was done as recommended by WHO for  
6 STEPS NCD risk factors screening surveys.  
7  
8  
9

10 At the first stage, the choice of clusters or enumeration zones by administrative regions was  
11 made by a systematic draw with proportional probability to the size of the EAs.  
12  
13

14 At the second stage, a household count in each of the selected 240 clusters at the first stage  
15 provided a list of households from which a sample of 20 households was selected using a simple  
16 systematic random sampling with an Excel Spread Sheet.  
17  
18  
19

20 At the third level, the choice of individuals within households was made randomly using Kish  
21 method [24]. In each household, an individual of 25 to 64 years old living in the household was  
22 drawn to participate in the survey.  
23  
24  
25

### 26 *Sample Size and power of the study*

27  
28

29 The sample size was calculated by using the following formula:  
30  
31

$$32 \quad n = \left( \frac{Z_{\alpha}^2 * P(1 - P)}{e^2} * 1,5 * 8 \right) / 0,8$$

33  
34  
35

36 where  $z_{\alpha} = 1.96$  for a risk  $\alpha$  of 0.05;  $e$  = absolute margin of error on the estimate of the  
37 proportion (0.05);  $P$ : expected hypertension prevalence (0.296). The sample size was adjusted  
38 to account for the design effect (1.5), the number of age group per gender (8) and the expected  
39 non response rate (20%).  
40  
41  
42  
43  
44

45 The STEPS survey was conducted on a representative sample of 4,800 individuals. Out of the  
46 4800 participants, 152 were excluded for pregnancy, 153 for missing data (on height and / or  
47 weight) and 23 due to a lack of sampling weights. The sample that we analyzed finally included  
48 4472 persons (See figure1 for study inclusion process). With this final sample size and  
49 assuming a prevalence of obesity of 4.5%, our study has a statistical power of 86.6% to detect  
50 an association of a magnitude of 1.5 with the  $\alpha$  threshold of 5%.  
51  
52  
53  
54  
55  
56  
57  
58  
59  
60

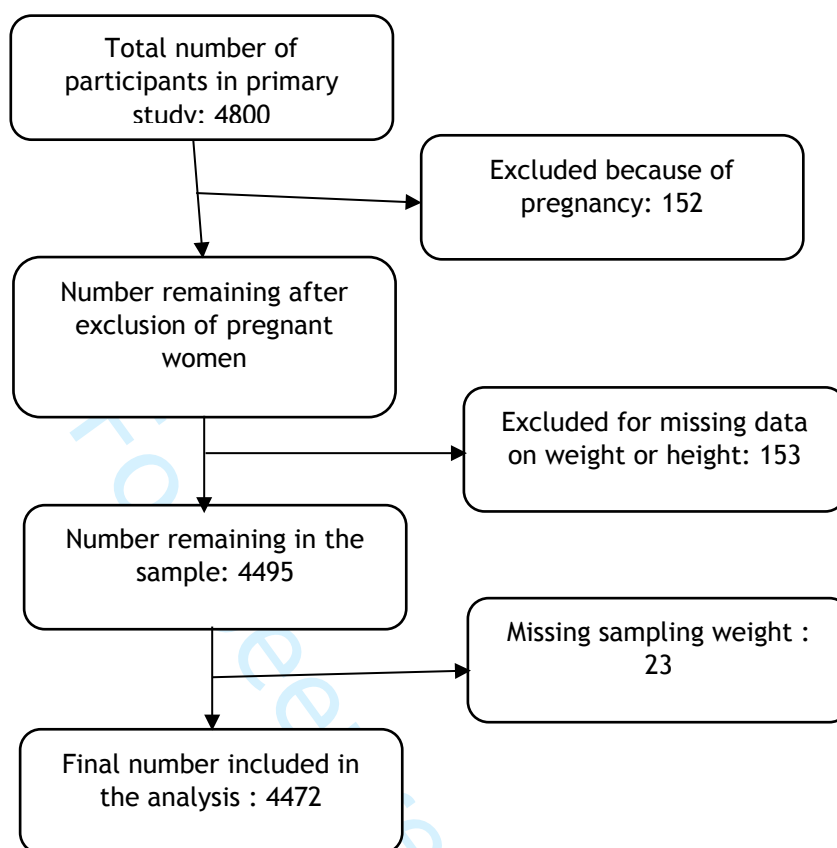

Figure 1 : Diagram flow of the study participants.

### ***Data collection***

The collection of data was carried out by nurses, graduate medical and nurse students. The data collection consisted in face-to-face interviews of selected participants using standardized questionnaires and physical and biochemical measurements. The data collection tools were pre-tested before they were used at the national level.

Data collection teams were closely supervised by a team of supervisors composed of statisticians, epidemiologists and clinicians.

Height measurement (in cm) was made in a standing or lying position, using a portable measuring board, on the participant without shoes and hat. The weight in kg was measured using an electronic weighing scales (SECA™) placed on a stable and even surface, the person lightly dressed, shoes-off and in a standing position.

The total cholesterol and blood glucose levels were measured using a Cardiocheck <sup>TM</sup> PA SILVER kit that performs all these measurements using a capillary whole blood sample.

### **Study Variables**

The dependent variable, body mass index (BMI) was calculated dividing the weight (kg) by the size (in meters) squared and then used to define undernutrition (BMI <18.5 kg / m<sup>2</sup>), normal (18.5 - 24.99 kg / m<sup>2</sup>), overweight (25.0-29.99 kg / m<sup>2</sup>) and obesity (30 kg / m<sup>2</sup>) in accordance with WHO recommendations [2]. A variable with three modalities including normal, overweight and obese was used in univariate and multivariate analyzes.

Independent variables included age, marital status, place of residence, occupational activity, educational level, total cholesterol level, fasting blood glucose, smoking, alcohol consumption, the type of fat most commonly consumed and the intensity of physical activities. Some variables were recoded using specific cut-points of grouping (see Table 1).

Table 1 : Recoding of exposure variables

| <b>Variables</b>          | <b>Categories</b>                                                                                                                                                                                                                                                                                                                                                                                                                                                                                                                                                                                                                                                                |
|---------------------------|----------------------------------------------------------------------------------------------------------------------------------------------------------------------------------------------------------------------------------------------------------------------------------------------------------------------------------------------------------------------------------------------------------------------------------------------------------------------------------------------------------------------------------------------------------------------------------------------------------------------------------------------------------------------------------|
| Age groups (years)        | «25 to 34» «35 to 44» «45 to 54» «55 to 64»                                                                                                                                                                                                                                                                                                                                                                                                                                                                                                                                                                                                                                      |
| Education level           | «None» «Primary» «Secondary and higher»                                                                                                                                                                                                                                                                                                                                                                                                                                                                                                                                                                                                                                          |
| Marital status            | «Single» «Cohabiting/Married» «Divorced/widowed/ separated»                                                                                                                                                                                                                                                                                                                                                                                                                                                                                                                                                                                                                      |
| Occupational status       | «Employed» «self-employed» «Unemployed» «House makers »                                                                                                                                                                                                                                                                                                                                                                                                                                                                                                                                                                                                                          |
| Total cholesterol level   | Normal (<5.2 mmol/l); High cholesterol (≥5.2 mmol/l)                                                                                                                                                                                                                                                                                                                                                                                                                                                                                                                                                                                                                             |
| Fasting capillary glucose | Normal (<6.1 mmol/l); High glucose (≥6.1 mmol/l)                                                                                                                                                                                                                                                                                                                                                                                                                                                                                                                                                                                                                                 |
| Cigarette smoking         | « Never » «Current smoker » « Former smoker » « Second hand smoking »                                                                                                                                                                                                                                                                                                                                                                                                                                                                                                                                                                                                            |
| Daily alcohol consumption | <ul style="list-style-type: none"> <li>• Male : None (0 g) Low (0.01 – 39.99 g) Medium (40 - 59.99) High (60 and over)</li> <li>• Female : None (0 g) Low (0.01 – 19.99 g) Medium (20 - 39.99) High (40 and over)</li> </ul>                                                                                                                                                                                                                                                                                                                                                                                                                                                     |
| Fat intake                | «None» «Vegetable oil» « butter, lard or fat, margarine»                                                                                                                                                                                                                                                                                                                                                                                                                                                                                                                                                                                                                         |
| Physical activity         | <ul style="list-style-type: none"> <li>• High intensity activity: high intensity activities require an energy expenditure greater than 6 Metabolic equivalent of Task (METs). Examples include soccer playing, hole digging, regular swimming, farming etc.</li> <li>• Moderate intensity activity: moderate intensity activities require an energy expenditure of approximately 3–6 METs. Examples include cleaning, vacuuming, polishing, gardening, cycling at a regular pace or horse riding etc.</li> <li>• Low intensity activity: refers to persons who do not meet the above classifications. Here are included people with limited and no physical activity.</li> </ul> |

### ***Statistical analysis***

The predictive variables were selected based on the literature. We carried out stratified gender based analyzes. The Fischer Test was used to evaluate associations between the dependent variable and independent qualitative variables. We calculated crude proportional odds ratio (CPOR) and adjusted proportional adjusted (APORs) using an ordinal logistic regression. We computed robust standard errors to account for the clustered nature of the data. The proportional risk assumption and the overall goodness of fit of the final models were checked before the results were reported. All the analyses were based on complete data analysis (missing data were ignored in all analyses). All analyzes were carried out using the Stata 13.1 software.

#### **Patients and public involvement:**

No patient involved.

#### **Results**

##### ***Background characteristics of the study sample***

The socio-demographic characteristics of the individuals of the sample are presented in Table 2. Participants of the 25-34 age group were majority with 40.92%. There were 2249 women, which represents 52.6% of the participants. Participants with no educational level accounted for 72.93% among men against 77.17% among women. The majority of the individuals were married/living in couple (86.96%).

Table 2 : Demographic and behavioural characteristics of study participants.

| Variables                     | Population   |              | Total        |
|-------------------------------|--------------|--------------|--------------|
|                               | Male n(%)    | Female n(%)  |              |
| <b>Residence</b>              |              |              |              |
| Urban                         | 454 (25.52)  | 539 (29.70)  | 993 (27.72)  |
| Rural                         | 1769 (74.48) | 1710 (70.30) | 3479 (72.28) |
| <b>Age groups</b>             |              |              |              |
| 25 - 34                       | 933 (38.09)  | 1044 (43.45) | 1977 (40.92) |
| 35 - 44                       | 560 (28.21)  | 573 (37.65)  | 1133 (27.91) |
| 45 - 54                       | 424 (20.22)  | 404 (18.49)  | 828 (19.31)  |
| 55 - 64                       | 306 (13.48)  | 228 (10.40)  | 534 (11.86)  |
| <b>Education level</b>        |              |              |              |
| None                          | 1623 (72.93) | 1832 (81.16) | 3455 (77.27) |
| Primary                       | 405 (17.85)  | 288 (13.07)  | 693 (15.33)  |
| Secondary (school) and higher | 187 (9.22)   | 129 (5.78)   | 316 (7.40)   |
| <b>Marital status</b>         |              |              |              |
| Single                        | 254 (11.04)  | 68 (3.24)    | 322 (6.93)   |
| Cohabiting/Married            | 1879 (85.74) | 1963 (88.06) | 3842 (86.96) |
| Divorced/Widowed/separated    | 87 (3.21)    | 216 (8.70)   | 303 (6.10)   |
| <b>Occupational status</b>    |              |              |              |
| Employed                      | 178 (6.68)   | 71 (3.44)    | 249 (2.92)   |
| Self-employed                 | 1945 (86.12) | 1188 (50.40) | 3133 (67.32) |
| Unemployed                    | 87 (4.51)    | 54 (2.44)    | 141 (3.42)   |
| Housemaker                    | 13 (0.70)    | 936 (43.72)  | 949 (23.34)  |

### ***Prevalence of overweight and obesity***

As shown in Table 3, the prevalence of overweight and obesity in the sample were respectively 13.82 (CI<sub>95%</sub>: 12.25 - 15.55) and 4.84 (CI<sub>95%</sub>: 3.99 - 5.86). The prevalence of obesity was higher among women ( $p < 0.0001$ ) and among urban residents ( $p < 0.0001$ ). However, the proportion of overweight people did not significantly differ between women and men. Among all age groups, obesity was more prevalent in the age group 35 to 44 ( $p < 0.0001$ ). The prevalence of obesity also varies across administrative regions.

**Tableau 3 : Prevalence of underweight, overweight and obesity among study participants.**

|                           | n           | Underweight % (95% CI)       | Overweight % (95% CI)        | Obesity % (95% CI)        |
|---------------------------|-------------|------------------------------|------------------------------|---------------------------|
| <b>Gender</b>             |             |                              |                              |                           |
| Male                      | 2223        | 8.10 (6.71 - 97.3)           | 13.91 (11.88 -16.22)         | 3.29 (2.33 - 4.62)        |
| Female                    | 2249        | 15.05 (13.19 - 17.12)        | 13.74 (11.86 -15.86)         | 6.24 (5.11 - 7.60)        |
| <b>Age groups (years)</b> |             |                              |                              |                           |
| 25 - 34                   | 1977        | 9.32 (7.76 - 11.17)          | 12.09 (10.22 - 14.24)        | 3.73 (2.69 - 5.16)        |
| 35 - 44                   | 1133        | 10.77 (8.70 - 13.25)         | 16.12 (13.35 - 19.34)        | 5.64 (4.26 - 7.43)        |
| 45 - 54                   | 828         | 14.05 (11.63 - 16.89)        | 15.75 (12.79 -19.24)         | 5.26 (3.61 - 7.61)        |
| 55 - 64                   | 534         | 18.75 (15.04 - 23.13)        | 11.22 (8.36 - 14.90)         | 6.10 (3.97 - 9.24)        |
| <b>Residence</b>          |             |                              |                              |                           |
| Rural                     | 3479        | 13.32 (11.79 - 15.03)        | 9.74 (8.33 - 11.35)          | 1.89 (1.40 - 2.53)        |
| Urban                     | 993         | 7.67 (5.09 - 11.42)          | 24.46 (20.06 - 29.47)        | 12.54 (9.75- 15.99)       |
| <b>Total</b>              | <b>4472</b> | <b>11.76 (10.40 - 13.27)</b> | <b>13.82 (12.25 - 15.55)</b> | <b>4.84 (3.99 - 5.86)</b> |

### **Risk factors for Obesity and overweight**

#### **Among men**

In multivariable analysis, significant risk factors for overweight and obesity among men included place of residence, age, marital status, tobacco and fat consumption. Men living in urban areas were around 4 times proportionally more likely to be at least overweight as compared to those living in rural areas (APOR: 3.56, CI<sub>95%</sub>: 2.38 - 5.33). The odds of being overweight or obese was lower within the 25 to 34 age group compared to other age groups. Men aged 35 to 44 years were two times proportionally more likely to be overweight or obese (APOR: 2.08, CI<sub>95%</sub>: 1.37 - 3.16). Compared to single men, men living in unions and those living separately, widowed or divorced were having a higher proportional odds of being overweight or obese (APOR: 2.44, CI<sub>95%</sub>: 1.28 - 4.66 and OR: 4.18, CI<sub>95%</sub>: 1.76 - 9.94). The consumption of tobacco reduces by half the proportional odds (APOR: 0.56, CI<sub>95%</sub>: 0.36 - 0.87) as well as the report of frequent consumption of butter / fat / lard (APOR: 0.49, IC: 0.28 - 0.83).

#### **Among women**

Among women, significant risk factors included urban residence, current tobacco consumption, educational level, cholesterol and fasting blood glucose levels. Urban residential status was associated with around three-fold increase in the proportional odds of obesity or overweight (APOR 2.90, CI<sub>95%</sub>:2.10 - 4.00) as compared to rural residence. Being of primary school

1  
2  
3 education level increased nearly two times the proportional odds of overweight or obesity (OR:  
4 1.63, CI<sub>95%</sub>: 1.10 - 2.41) as compared to those that have not been at school (no education).  
5  
6 Women with hypercholesterolemia (total cholesterol) and elevated blood glucose also  
7  
8 presented higher proportional odds of being overweight or obese (OR: 3.51, CI<sub>95%</sub>: 1.80 - 6.86  
9  
10 and OR: 1.96, CI<sub>95%</sub>: 1.08 - 3.55 respectively). The proportional odds of being at least  
11  
12 overweight was lower among current tobacco smokers compared to non-smokers (OR: 0.21,  
13  
14 CI<sub>95%</sub>: 0.10 - 0.43). The results of the multivariable analysis are presented in Table 4.  
15  
16  
17  
18  
19  
20  
21  
22  
23  
24  
25  
26  
27  
28  
29  
30  
31  
32  
33  
34  
35  
36  
37  
38  
39  
40  
41  
42  
43  
44  
45  
46  
47  
48  
49  
50  
51  
52  
53  
54  
55  
56  
57  
58  
59  
60

For peer review only

Table 4: Risk factors for overweight and obesity among male and female adult population aged 25–64

|                                | Male (n=2223)      |         |                   |         | Female (n=2249)   |         |                   |         |
|--------------------------------|--------------------|---------|-------------------|---------|-------------------|---------|-------------------|---------|
|                                | CPOR (95% CI)      | p-value | APOR (95% CI)     | p-value | CPOR (95% CI)     | p-value | APOR (95% CI)     | p-value |
| <b>Residence area</b>          |                    |         |                   |         |                   |         |                   |         |
| Rural                          | 1.00               |         | 1.00              |         | 1.00              |         | 1.00              |         |
| Urban                          | 3.97 (2.93 -5.38)  | 0.000   | 3.56 (2.38 -5.33) | 0.000   | 3.83 (3.72 -6.28) | 0.000   | 2.90 (2.10 -4.00) | 0.000   |
| <b>Age (years)</b>             |                    |         |                   |         |                   |         |                   |         |
| 25 – 34                        | 1.00               |         | 1.00              |         | 1.00              |         | 1.00              |         |
| 35 – 44                        | 1.96 (1.39 - 2.78) | 0.000   | 2.08 (1.37 -3.16) | 0.001   | 1.29 (0.97 -1.73) | 0.081   | 1.34 (0.94 -1.91) | 0.103   |
| 45 – 54                        | 1.74 (1.18 - 2.56) | 0.005   | 1.72 (1.07 -2.78) | 0.026   | 1.46 (1.04 -2.07) | 0.030   | 1.42 (0.94 -2.15) | 0.098   |
| 55 – 64                        | 1.42 (0.90 - 2.25) | 0.133   | 1.23 (0.76 -2.12) | 0.448   | 1.40 (0.87 -2.26) | 0.168   | 1.64 (0.90 -3.00) | 0.105   |
| <b>Education</b>               |                    |         |                   |         |                   |         |                   |         |
| None                           | 1.00               |         | 1.00              |         | 1.00              |         | 1.00              |         |
| Primary                        | 1.22 (0.82 -1.80)  | 0.320   | 1.11 (0.68 -1.79) | 0.681   | 2.92 (2.09 -4.09) | 0.000   | 1.63 (1.10 -2.41) | 0.014   |
| Secondary<br>(school) and over | 3.24 (2.12 -4.95)  | 0.000   | 1.37 (0.76 -2.47) | 0.294   | 4.07 (2.56 -6.46) | 0.000   | 1.28 (0.66 -2.50) | 0.464   |
| <b>Occupation</b>              |                    |         |                   |         |                   |         |                   |         |
| Employed                       | 1.00               |         | 1.00              |         | 1.00              |         | 1.00              |         |
| Self-employed                  | 0.28 (0.19 -0.43)  | 0.000   | 0.78 (0.42 -1.42) | 0.412   | 0.21 (0.12 -0.36) | 0.000   | 0.52 (0.23 -1.14) | 0.104   |



|                            |                   |       |                   |       |                    |       |                   |       |
|----------------------------|-------------------|-------|-------------------|-------|--------------------|-------|-------------------|-------|
| Unemployed                 | 0.51 (0.25 -1.02) | 0.057 | 0.86 (0.38 -1.95) | 0.714 | 0.57 (0.22 -1.45)  | 0.236 | 0.90 (0.90 -1.65) | 0.200 |
| House maker                |                   |       |                   |       | 0.27 (0.16 -0.47)  | 0.000 | 0.50 (0.22 -1.13) | 0.097 |
| <b>Marital status</b>      |                   |       |                   |       |                    |       |                   |       |
| Single                     | 1.00              |       | 1.00              |       | 1.00               |       | 1.00              |       |
| Cohabiting/Married         | 1.30 (0.81 -2.07) | 0.271 | 2.44 (1.28 -4.66) | 0.007 | 0.66 (0.31 -1.43)  | 0.297 | 1.84 (0.73 -4.61) | 0.193 |
| Divorced/Widowed/<br>ed/   | 2.13 (0.96 -4.73) | 0.063 | 4.18 (1.76 -9.94) | 0.001 | 0.72 (0.31 -1.70)  | 0.459 | 1.84 (0.66 -5.10) | 0.244 |
| <b>Total cholesterol</b>   |                   |       |                   |       |                    |       |                   |       |
| Normal                     | 1.00              |       | 1.00              |       | 1.00               |       | 1.00              |       |
| High cholesterol           | 3.41 (1.44 -8.11) | 0.05  | 1.62 (0.54 -4.81) | 0.403 | 5.62 (3.06 -10.32) | 0.000 | 3.51 (1.80 -6.86) | 0.000 |
| <b>Fasting glucose</b>     |                   |       |                   |       |                    |       |                   |       |
| Normal                     | 1.00              |       | 1.00              |       | 1.00               |       | 1.00              |       |
| High glucose               | 1.71 (0.93 -3.14) | 0.083 | 1.30 (0.61 -2.76) | 0.545 | 2.17 (1.27 -3.71)  | 0.05  | 1.96 (1.08 -3.55) | 0.026 |
| <b>Tobacco consumption</b> |                   |       |                   |       |                    |       |                   |       |
| Never                      | 1.00              |       | 1.00              |       | 1.00               |       | 1.00              |       |
| Current smoker             | 0.64 (0.43 -0.95) | 0.027 | 0.56 (0.36 -0.86) | 0.009 | 0.20 (0.10 -0.37)  | 0.000 | 0.21 (0.10 -0.43) | 0.000 |
| Former smoker              | 1.44 (0.77 -2.71) | 0.257 | 1.02 (0.46 -2.23) | 0.960 | 0.98 (0.18 -5.21)  | 0.983 | 0.42 (0.94 -1.92) | 0.265 |
| Second hand smoking        | 1.27 (0.92 -1.75) | 0.151 | 0.98 (0.69 -1.40) | 0.920 | 1.30 (0.99 -1.71)  | 0.056 | 1.09 (0.79 -1.49) | 0.600 |

|                                |                   |       |                   |       |                   |       |                   |       |  |
|--------------------------------|-------------------|-------|-------------------|-------|-------------------|-------|-------------------|-------|--|
| <b>Alcohol</b>                 |                   |       |                   |       |                   |       |                   |       |  |
| None                           | 1.00              |       | 1.00              |       | 1.00              |       | 1.00              |       |  |
| Low                            | 1.04 (0.71 -1.51) | 0.856 | 1.02 (0.68 -1.52) | 0.919 | 0.47 (0.26 -0.85) | 0.012 | 0.60 (0.30 -1.21) | 0.153 |  |
| Medium                         | 1.69 (1.00 -2.82) | 0.047 | 1.43 (0.83 -2.47) | 0.192 | 1.44 (1.00 -2.07) | 0.047 | 1.44 (0.96 -2.17) | 0.078 |  |
| High                           | 1.52 (0.74 -3.13) | 0.257 | 1.26 (0.61 -2.64) | 0.530 | 1.21 (0.57 -2.59) | 0.620 | 0.68 (0.30 -1.30) | 0.378 |  |
| <b>Fat used</b>                |                   |       |                   |       |                   |       |                   |       |  |
| None                           | 1.00              |       | 1.00              |       | 1.00              |       | 1.00              |       |  |
| Vegetable oil                  | 1.10 (0.71 -1.71) | 0.658 | 0.71 (0.44 -1.13) | 0.144 | 2.00 (1.27 -3.18) | 0.03  | 1.30 (0.76 -2.21) | 0.335 |  |
| Butter, lard or fat, margarine | 0.48 (0.28 -0.81) | 0.006 | 0.49 (0.28 -0.83) | 0.008 | 0.73 (0.44 -1.23) | 0.240 | 0.73 (0.41 -1.32) | 0.302 |  |
| <b>Physical activity</b>       |                   |       |                   |       |                   |       |                   |       |  |
| Low intensity                  | 1.00              |       | 1.00              |       | 1.00              |       | 1.00              |       |  |
| Moderate intensity:            | 0.58 (0.38 -0.90) | 0.016 | 0.71 (0.43 -1.17) | 0.179 | 0.76 (0.53 -1.10) | 0.147 | 0.89 (0.59 -1.34) | 0.581 |  |
| High intensity                 | 0.44 (0.30 -0.65) | 0.000 | 0.68 (0.43 -1.08) | 0.101 | 0.55 (0.39 -0.76) | 0.000 | 0.87 (0.59 -1.30) | 0.506 |  |

*CPOR : Crude proportional odds ratio ; APOR : Adjusted proportional odds ratio ; CI : Confidence interval*

## Discussion

### *Prevalence of overweight and obesity*

The overall prevalence of overweight was relatively high in our study, with no significant difference between men and women. Studies in Africa have also found similar prevalence among both sex[19,25]. However, some authors reported higher proportion of overweight among men[26–28]. The prevalence of obesity in our study was around 5% with disparities found across regions.

The prevalence of obesity was higher among women. Several other studies also reported the prevalence of obesity among women[6,7,29–32]. Hormonal effects, especially among older ages, women's maternity and lifestyle, and certain cultural conceptions, would contribute to this higher burden of obesity among women[33].

### *Factors associated with obesity in Burkina Faso*

Living in urban areas and current tobacco consumption are factors associated with obesity or overweight among both genders. Van Der and all in Gambia[16], also noted that risk in urban areas was about 3 times higher than in rural areas (OR: 2.86, 95% CI: 1.89 - 4 , 35). Abubakari et al. in a meta-analysis of studies conducted in sub-Saharan Africa[33] also noted that the risk was higher in urban areas (OR: 2.70, 95% CI, 1.76-4.15). This high risk could be explained by more sedentary lifestyle in urban areas as previously mentioned. In addition, in urban areas, the population consumes more sugar rich foods and fats known as "urban" or "western" foods[5]. Current tobacco consumption was inversely associated with the occurrence of overweight or obesity within both genders. Results from other studies reported that smoking for a long period tends to lead to weight loss. Similarly, cessation of tobacco consumption goes along with weight gain[34,35].

Other factors associated with overweight or obesity among men were age, marital status, consumption of butter /lard / margarine. Several authors also reported a positive association between the risk of obesity and age[9,12,27]. Aging leads to less physical activity and combined with greater socio-economic status, increase the ability to access diverse foods. The use of butter / fat / margarine as the main source of lipid was inversely associated with obesity in our data. This is an unexpected result as one would expect a lower risk of overweight and obesity among those that use predominantly vegetable oil. The lack of quantification of the consumption of the different types of oil makes difficult the comparison. Physical activity was associated with decrease in the odds of obesity in our data but the magnitude of the association

1  
2  
3 did not reach significance. Other studies carried out by Pasquet et al. in Cameroon[11] and  
4  
5 Oladimeji in Nigeria[13] revealed that the practice of intensive physical activity reduces  
6  
7 significantly the risk of obesity.

8  
9 Indeed, the intensive physical activity leads to an increase in the energy expenditure, avoids fat  
10  
11 deposition and promotes a development of the muscular mass [36]. Men living in couple were  
12  
13 about 75% less likely to be obese compared to single men. Single men have little control over  
14  
15 the meals they consume as compared to married ones and may be more exposed to the  
16  
17 consumption of restaurants and fast food meals, rich in calories.

18  
19 Among women, participants who had at least primary and secondary school levels were three  
20  
21 and four times more likely to be obese compared to uneducated people. However, in their study  
22  
23 among women living in urban areas, Benkeser et al. in Ghana [33] did not find a relation  
24  
25 between educational level and obesity. This could be explained by the fact that their study was  
26  
27 exclusively carried out in urban areas. The relation between obesity, hypercholesterolemia and  
28  
29 hyperglycemia is well-known and was also reported by several authors[6,7,29–32].

### 30 31 **Conclusion**

32  
33 Our study showed an important burden of obesity and overweight in the adult population with  
34  
35 women more affected than men. Overnutrition needs to be recognized as an important public  
36  
37 health issue. The country is witnessing the double burden of malnutrition with the coexistence  
38  
39 of overnutrition and undernutrition. Nutrition interventions need to be reshaped to account for  
40  
41 this epidemiological picture of malnutrition in Burkina Faso.

### 42 43 **Abbreviations**

44  
45 BMI: body mass index; CI: confidence interval; CPOR : Crude proportional odds ratio ;  
46  
47 APOR : Adjusted proportional odds ratio ; WHO : World health organization.

### 48 49 **Acknowledgements**

50  
51  
52 This research was carried out by SK as partial fulfilment of his master program in public health  
53  
54 at the African Institute of Public Health. SK was granted funds by the Ministry of Health of  
55  
56 Burkina Faso for his master's program.

1  
2  
3 The authors are grateful to the Ministry of Health for giving access to the data. We would also  
4 like to thank the African Institute of Public Health for the logistic support to the drafting of the  
5 article.  
6  
7

### 8 9 **Funding**

10  
11 This work is a secondary analysis of data from the STEPS survey. Authors didn't receive  
12 funding for this work.  
13  
14

### 15 16 **Data availability**

17  
18 The STEPS 2013 survey database was used for this study. These data can be obtained at the  
19 Ministry of Health by a request. Any request for further analysis can be submitted to Dr Brice  
20 Bicaba [bicababrico78@gmail.com](mailto:bicababrico78@gmail.com).  
21  
22

### 23 24 25 **Authors contribution**

26  
27 SK1, MT and SK2 designed the study and SK1 drafted the paper. SK1 and MT performed initial  
28 analysis and MT reanalysed the data. SK2, BB and HL made substantial contributions to the  
29 interpretation of the data. All authors read and approved the final manuscript.  
30  
31

### 32 33 **Conflicts of interest**

34  
35  
36 None  
37

### 38 39 **Consent for publication**

40  
41 Not applicable.  
42  
43  
44

### 45 46 **Ethical considerations**

47  
48 The STEPS survey got approval from the Ethics Committee for Health Research (Deliberation  
49 No. 2012-12-092 of 05 December 2012). Written informed consent was obtained before  
50 inclusion in the study. For this study, we obtained an authorization from the General directorate  
51 of Health to reanalyze the data and the confidentiality of study participants was preserved.  
52  
53  
54  
55  
56  
57  
58  
59  
60

## References

1. OMS | Obésité et surpoids [Internet]. WHO. available to: <http://www.who.int/>
2. World Health Organization. Obesity: Preventing and managing the global epidemic. Geneva: World Health Organization; 2000.
3. DELPEUCH E, MAIRE B. Obésité et développement des pays du sud. *Med Trop.* 1997;57(4):380-8.
4. World Health Organization. Global status report on noncommunicable diseases 2014: attaining the nine global noncommunicable diseases targets; a shared responsibility. Geneva: World Health Organization; 2014.
5. Zeba ANZ. Transition nutritionnelle et double fardeau de la malnutrition chez des adultes de Ouagadougou au Burkina Faso (Afrique de l'Ouest) [PhD]. [Canada]: Université de Montreal; 2012.
6. van der Sande MAB, Bailey R, Faal H, Banya WAS, Dolin P, Nyan OA, et al. Nationwide prevalence study of hypertension and related non-communicable diseases in The Gambia. *Trop Med Int Health.* nov 1997;2(11):1039-48.
7. Njelekela M, Ikeda K, Mtabaji J, Yamori Y. Obesity and other risk factors for cardiovascular diseases among Africans: results from CARDIAC study in Tanzania. *Int Congr Ser.* mai 2004;1262:372-5.
8. Abubakari AR, Lauder W, Agyemang C, Jones M, Kirk A, Bhopal RS. Prevalence and time trends in obesity among adult West African populations: a meta-analysis. *Obes Rev.* juill 2008;9(4):297-311.
9. Sagna Y. Obesity and Metabolic Syndrome in a Burkina Faso Urban Area: Prevalence, Associated Factors and Comorbidities. *J Nutr Disord Ther.* nov 2014;04(02).
10. Fezeu L. Association between socioeconomic status and adiposity in urban Cameroon. *Int J Epidemiol.* 4 juill 2005;35(1):105-11.
11. Pasquet P, Temgoua LS, Melaman-Sego F, Froment A, Rikong-Adié H. Prevalence of overweight and obesity for urban adults in Cameroon. *Ann Hum Biol.* janv 2003;30(5):551-62.
12. Maruf FA, Udoji NV. Prevalence and Socio-Demographic Determinants of Overweight and Obesity in a Nigerian Population. *J Epidemiol.* 2015;25(7):475-81.
13. Oladimeji AM, Fawole O, Nguku P, Nsubuga P. Prevalence and factors associated with hypertension and obesity among civil servants in Kaduna, Kaduna State, June 2012. *Pan Afr Med J.* 2014;18(Suppl 1).

14. Tene Marceline Y. Obesity, Central Obesity, Overweight and Diabetes: Women are the Most Affected in Burkina Faso. *J Womens Health Care*. 2014;03(03).
15. Pessinaba S, Yayehd K, Pio M, Baragou R, Afassinou Y, Tchérou T, et al. L'obésité en consultation cardiologique à Lomé: prévalence et facteurs de risque cardio-vasculaire associés-étude chez 1200 patients. *Pan Afr Med J*. 2013;12(1).
16. Mabilia-Babela J-R, Sabaye Alima J, Monabeka HG, Mbika Cardorelle A, Nkoua J-L, Moyen G. Profil épidémiologique et clinique de l'obésité de l'enfant à Brazzaville (Congo). *Cah Nutr Diététique*. nov 2011;46(5):259-62.
17. Koueta F, Dao L, Dao F, Djekompté S, Sawadogo J, Diarra Y, et al. Facteurs associés au surpoids et à l'obésité des élèves de Ouagadougou (Burkina Faso). *Santé*. 2011;21(4):5.
18. Kramoh KE, N'goran YNK, Aké-Traboulsi E, Boka BC, Harding DE, Koffi DBJ, et al. Prévalence de l'obésité en milieu scolaire en Côte d'Ivoire. *Ann Cardiol Angéiologie*. juin 2012;61(3):145-9.
19. Msyamboza KP, Kathyola D, Dzewela T. Anthropometric measurements and prevalence of underweight, overweight and obesity in adult Malawians: nationwide population based NCD STEPS survey. *Pan Afr Med J [Internet]*. 24 juill 2013 [cité 12 mars 2017];15. Disponible sur: <http://www.ncbi.nlm.nih.gov/pmc/articles/PMC3828071/>
20. Institut National de la démographie. Recensement général de la population et de l'habitation de 2006. Burkina Faso; 2008. 52 p.
21. Ministère de la santé. Annuaire statistique 2014. Burkina Faso; 2015 p. 330.
22. Ministère de la santé. Rapport de l'enquete nutritionnelle nationale. Burkina Faso; 2014 p. 56.
23. Organisation mondiale de la Santé. Profils des pays pour les maladies non transmissibles (MNT), 2014.
24. Wiegand H. Kish, L.: Survey Sampling. John Wiley & Sons, Inc., New York, London 1965, IX + 643 S., 31 Abb., 56 Tab., Preis 83 s. *Biom Z*. 1 janv 1968;10(1):88-9.
25. Adebayo RA, Balogun MO, Adedoyin RA, Obashoro-John OA, Bisiriyu LA, Abiodun OO. Prevalence and pattern of overweight and obesity in three rural communities in southwest Nigeria. *Diabetes Metab Syndr Obes Targets Ther*. 10 mai 2014;7:153-8.
26. Kamadjeu RM, Edwards R, Atanga JS, Kiawi EC, Unwin N, Mbanya J-C. Anthropometry measures and prevalence of obesity in the urban adult population of Cameroon: an update from the Cameroon Burden of Diabetes Baseline Survey. *BMC Public Health*. 2006;6(1):228.

- 1  
2  
3 27. Kirunda BE, Fadnes LT, Wamani H, Van den Broeck J, Tylleskär T.  
4 Population-based survey of overweight and obesity and the associated factors in  
5 peri-urban and rural Eastern Uganda. *BMC Public Health*. 2015;15(1):1168.  
6
- 7  
8 28. Gomes A, Damasceno A, Azevedo A, Prista A, Silva-Matos C, Saranga S, et al.  
9 Body mass index and waist circumference in Mozambique: urban/rural gap  
10 during epidemiological transition. *Obes Rev Off J Int Assoc Study Obes*. sept  
11 2010;11(9):627-34.  
12
- 13  
14 29. Saeed KMI. Prevalence and associated risk factors for obesity in Jalalabad  
15 city - Afghanistan. *Alex J Med*. janv 2015;  
16
- 17  
18 30. Cai L, He J, Song Y, Zhao K, Cui W. Association of obesity with socio-  
19 economic factors and obesity-related chronic diseases in rural southwest China.  
20 *Public Health*. mars 2013;127(3):247-51.  
21
- 22  
23 31. Bicaba BW. Etude des facteurs associés au diabète au Burkina Faso [Mémoire  
24 de master]. [Ouagadougou]: Institut Africain de Santé publique; 2015.  
25
- 26  
27 32. Soubeiga JK, Millogo T, Bicaba BW, Doulougou B, Kouanda S. Prevalence and  
28 factors associated with hypertension in Burkina Faso: a countrywide cross-  
29 sectional study. *BMC Public Health*. 2017;17:64.  
30
- 31  
32 33. Benkeser RM, Biritwum R, Hill AG. Prevalence of Overweight and Obesity and  
33 Perception of Healthy and Desirable Body Size in Urban, Ghanaian Women.  
34 *Ghana Med J*. juin 2012;46(2):66-75.  
35
- 36  
37 34. Weg MWV, Klesges RC, DeBon M. Relationship Between Smokeless Tobacco  
38 Use and Body Weight in Young Adult Military Recruits. *Nicotine Tob Res*. 1 avr  
39 2005;7(2):301-5.  
40
- 41  
42 35. Rodu B, Stegmayr B, Nasic S, Cole P, Asplund K. The influence of smoking  
43 and smokeless tobacco use on weight amongst men. *J Intern Med*. janv  
44 2004;255(1):102-7.  
45
- 46  
47 36. Tremblay A, Therrien F. Physical activity and body functionality:  
48 implications for obesity prevention and treatment. *Can J Physiol Pharmacol*.  
49 févr 2006;84(2):149-56.  
50  
51  
52  
53  
54  
55  
56  
57  
58  
59  
60



STROBE Statement—Checklist of items that should be included in reports of *cross-sectional studies*

|                              | Item No | Recommendation                                                                                                                                                                                    | Page No     |
|------------------------------|---------|---------------------------------------------------------------------------------------------------------------------------------------------------------------------------------------------------|-------------|
| <b>Title and abstract</b>    | 1       | (a) Indicate the study's design with a commonly used term in the title or the abstract                                                                                                            | 1           |
|                              |         | (b) Provide in the abstract an informative and balanced summary of what was done and what was found                                                                                               | 2           |
| <b>Introduction</b>          |         |                                                                                                                                                                                                   |             |
| Background/rationale         | 2       | Explain the scientific background and rationale for the investigation being reported                                                                                                              | 4           |
| Objectives                   | 3       | State specific objectives, including any prespecified hypotheses                                                                                                                                  | 2&4         |
| <b>Methods</b>               |         |                                                                                                                                                                                                   |             |
| Study design                 | 4       | Present key elements of study design early in the paper                                                                                                                                           | 5           |
| Setting                      | 5       | Describe the setting, locations, and relevant dates, including periods of recruitment, exposure, follow-up, and data collection                                                                   | 5           |
| Participants                 | 6       | (a) Give the eligibility criteria, and the sources and methods of selection of participants                                                                                                       | 5&6         |
| Variables                    | 7       | Clearly define all outcomes, exposures, predictors, potential confounders, and effect modifiers. Give diagnostic criteria, if applicable                                                          | 7&8         |
| Data sources/<br>measurement | 8*      | For each variable of interest, give sources of data and details of methods of assessment (measurement). Describe comparability of assessment methods if there is more than one group              | 8           |
| Bias                         | 9       | Describe any efforts to address potential sources of bias                                                                                                                                         | 7&8         |
| Study size                   | 10      | Explain how the study size was arrived at                                                                                                                                                         | 6           |
| Quantitative variables       | 11      | Explain how quantitative variables were handled in the analyses. If applicable, describe which groupings were chosen and why                                                                      | 8           |
| Statistical methods          | 12      | (a) Describe all statistical methods, including those used to control for confounding                                                                                                             | 9           |
|                              |         | (b) Describe any methods used to examine subgroups and interactions                                                                                                                               | 9           |
|                              |         | (c) Explain how missing data were addressed                                                                                                                                                       | 9           |
|                              |         | (d) If applicable, describe analytical methods taking account of sampling strategy                                                                                                                | 9           |
|                              |         | (e) Describe any sensitivity analyses                                                                                                                                                             | None        |
| <b>Results</b>               |         |                                                                                                                                                                                                   |             |
| Participants                 | 13*     | (a) Report numbers of individuals at each stage of study—eg numbers potentially eligible, examined for eligibility, confirmed eligible, included in the study, completing follow-up, and analysed | 7& figure 1 |
|                              |         | (b) Give reasons for non-participation at each stage                                                                                                                                              | 7& figure 1 |
|                              |         | (c) Consider use of a flow diagram                                                                                                                                                                | Figure 1    |
| Descriptive data             | 14*     | (a) Give characteristics of study participants (eg demographic, clinical, social) and information on exposures and potential confounders                                                          | 9&10        |
|                              |         | (b) Indicate number of participants with missing data for each variable of interest                                                                                                               | 10          |

|                          |     |                                                                                                                                                                                                              |               |
|--------------------------|-----|--------------------------------------------------------------------------------------------------------------------------------------------------------------------------------------------------------------|---------------|
| Outcome data             | 15* | Report numbers of outcome events or summary measures                                                                                                                                                         | 10&11         |
| Main results             | 16  | (a) Give unadjusted estimates and, if applicable, confounder-adjusted estimates and their precision (eg, 95% confidence interval). Make clear which confounders were adjusted for and why they were included | 11&12&13&14   |
|                          |     | (b) Report category boundaries when continuous variables were categorized                                                                                                                                    | 10            |
|                          |     | (c) If relevant, consider translating estimates of relative risk into absolute risk for a meaningful time period                                                                                             | None included |
| Other analyses           | 17  | Report other analyses done—eg analyses of subgroups and interactions, and sensitivity analyses                                                                                                               | 11-15         |
| <b>Discussion</b>        |     |                                                                                                                                                                                                              |               |
| Key results              | 18  | Summarise key results with reference to study objectives                                                                                                                                                     | 16            |
| Limitations              | 19  | Discuss limitations of the study, taking into account sources of potential bias or imprecision. Discuss both direction and magnitude of any potential bias                                                   | 3&16          |
| Interpretation           | 20  | Give a cautious overall interpretation of results considering objectives, limitations, multiplicity of analyses, results from similar studies, and other relevant evidence                                   | 16            |
| Generalisability         | 21  | Discuss the generalisability (external validity) of the study results                                                                                                                                        | 16&17         |
| <b>Other information</b> |     |                                                                                                                                                                                                              |               |
| Funding                  | 22  | Give the source of funding and the role of the funders for the present study and, if applicable, for the original study on which the present article is based                                                | 18            |

\*Give information separately for exposed and unexposed groups.

**Note:** An Explanation and Elaboration article discusses each checklist item and gives methodological background and published examples of transparent reporting. The STROBE checklist is best used in conjunction with this article (freely available on the Web sites of PLoS Medicine at <http://www.plosmedicine.org/>, Annals of Internal Medicine at <http://www.annals.org/>, and Epidemiology at <http://www.epidem.com/>). Information on the STROBE Initiative is available at [www.strobe-statement.org](http://www.strobe-statement.org).

# BMJ Open

## Prevalence and risk factors for Overweight and obesity: a cross sectional countrywide study in Burkina Faso

|                                 |                                                                                                                                                                                                                                                                                                                                                                                                                                                                                                                                                                            |
|---------------------------------|----------------------------------------------------------------------------------------------------------------------------------------------------------------------------------------------------------------------------------------------------------------------------------------------------------------------------------------------------------------------------------------------------------------------------------------------------------------------------------------------------------------------------------------------------------------------------|
| Journal:                        | <i>BMJ Open</i>                                                                                                                                                                                                                                                                                                                                                                                                                                                                                                                                                            |
| Manuscript ID                   | bmjopen-2019-032953.R1                                                                                                                                                                                                                                                                                                                                                                                                                                                                                                                                                     |
| Article Type:                   | Original research                                                                                                                                                                                                                                                                                                                                                                                                                                                                                                                                                          |
| Date Submitted by the Author:   | 17-Jan-2020                                                                                                                                                                                                                                                                                                                                                                                                                                                                                                                                                                |
| Complete List of Authors:       | Kaboré, Seydou; Institut Africain de santé publique ; Ministère de la santé<br>Millogo, Tieba; Institut Africain de santé publique; Institut de Recherche en Sciences de la Sante<br>Soubeiga, Joseph; Institut Africain de santé publique; Ministère de la santé<br>Lanou, Hermann; Institut de Recherche en Sciences de la Sante; Institut Africain de santé publique<br>Bicaba, Brice; Institut Africain de santé publique; Ministère de la santé<br>Kouanda, Seni; Institut de Recherche en Sciences de la Santé (IRSS), ; Institut Africain de santé Publique (IASP), |
| <b>Primary Subject Heading</b>: | Epidemiology                                                                                                                                                                                                                                                                                                                                                                                                                                                                                                                                                               |
| Secondary Subject Heading:      | Nutrition and metabolism                                                                                                                                                                                                                                                                                                                                                                                                                                                                                                                                                   |
| Keywords:                       | nutritionnal epidemiology, EPIDEMIOLOGY, NUTRITION & DIETETICS                                                                                                                                                                                                                                                                                                                                                                                                                                                                                                             |
|                                 |                                                                                                                                                                                                                                                                                                                                                                                                                                                                                                                                                                            |

SCHOLARONE™  
Manuscripts



I, the Submitting Author has the right to grant and does grant on behalf of all authors of the Work (as defined in the below author licence), an exclusive licence and/or a non-exclusive licence for contributions from authors who are: i) UK Crown employees; ii) where BMJ has agreed a CC-BY licence shall apply, and/or iii) in accordance with the terms applicable for US Federal Government officers or employees acting as part of their official duties; on a worldwide, perpetual, irrevocable, royalty-free basis to BMJ Publishing Group Ltd ("BMJ") its licensees and where the relevant Journal is co-owned by BMJ to the co-owners of the Journal, to publish the Work in this journal and any other BMJ products and to exploit all rights, as set out in our [licence](#).

The Submitting Author accepts and understands that any supply made under these terms is made by BMJ to the Submitting Author unless you are acting as an employee on behalf of your employer or a postgraduate student of an affiliated institution which is paying any applicable article publishing charge ("APC") for Open Access articles. Where the Submitting Author wishes to make the Work available on an Open Access basis (and intends to pay the relevant APC), the terms of reuse of such Open Access shall be governed by a Creative Commons licence – details of these licences and which [Creative Commons](#) licence will apply to this Work are set out in our licence referred to above.

Other than as permitted in any relevant BMJ Author's Self Archiving Policies, I confirm this Work has not been accepted for publication elsewhere, is not being considered for publication elsewhere and does not duplicate material already published. I confirm all authors consent to publication of this Work and authorise the granting of this licence.

1  
2  
3 **Prevalence and risk factors for Overweight and obesity: a cross sectional**  
4 **countrywide study in Burkina Faso.**  
5  
6  
7  
8  
9

10 **Authors**

11 1. Seydou Kaboré, PharmD, MPH

12 Institut Africain de santé publique & Ministère de la Santé, Ouagadougou, Burkina Faso

13 [seydoupfarm@yahoo.fr](mailto:seydoupfarm@yahoo.fr)  
14

15 2. Tieba Millogo, MD, MSc, PhD (c)

16 Institut Africain de santé publique & Institut de Recherche en Sciences de la Santé,  
17 Ouagadougou, Burkina Faso

18 [millogorod@gmail.com](mailto:millogorod@gmail.com)  
19

20 3. Joseph Kouesyandé Soubeiga, MD, MPH

21 Ministère de la Santé, Ouagadougou, Burkina Faso

22 [ksoubeiga@yahoo.fr](mailto:ksoubeiga@yahoo.fr)  
23

24 4. Hermann Lanou, MD, MSc, PhD (c)

25 Institut Africain de santé publique & Institut de Recherche en Sciences de la Santé,  
26 Ouagadougou, Burkina Faso

27 [hlanou@yahoo.ca](mailto:hlanou@yahoo.ca)  
28

29 5. Brice W Bicaba , MD, MPH.

30 Ministry of Health, Burkina Faso

31 [bicaba\\_brico@yahoo.fr](mailto:bicaba_brico@yahoo.fr)  
32

33 6. Seni Kouanda, MD, MSc., PhD

34 Institut Africain de santé publique & Institut de Recherche en Sciences de la Santé,  
35 Ouagadougou, Burkina Faso

36 [skouanda@irss.bf](mailto:skouanda@irss.bf)  
37

38 **Corresponding Author**

39 Seni Kouanda

40 [skouanda@irss.bf](mailto:skouanda@irss.bf)  
41

42 Institut Africain de santé publique, Deputy Director

43 PBox: 12 BP 199 Ouagadougou

44 Tel: (+226) 70261462  
45  
46  
47  
48  
49  
50  
51  
52  
53  
54  
55  
56  
57  
58  
59  
60

1  
2  
3 **Word count:** 2929  
4

5 **Keywords:** Obesity, epidemiology of non-communicable disease, low-middle-income  
6 countries  
7

8  
9 **Abstract**  
10

11 **Objective:** The objective of this study was to determine the prevalence and predictors of  
12 overweight and obesity in Burkina Faso using a population-based country-wide sample. We  
13 hypothesize that there is a significant burden related to overweight/obesity in Burkina Faso.  
14

15  
16  
17 **Design:** Secondary analysis of a population-based country wide cross-sectional study  
18

19  
20 **Setting:** Burkina Faso, all the 13 regions including both rural and urban residential areas  
21

22 **Participants:** 4,800 participants of both sexes, aged between 25 and 64 years.  
23

24 **Main outcomes:** overweight and obesity using body mass index cut-off levels of WHO  
25

26  
27 **Results:** The prevalence of overweight and obesity in Burkina Faso were 13.82% (CI95%:  
28 12.25 - 15.55) and 4.84% (CI95%:3.99 - 5.86) respectively. Among men, the proportional odds  
29 of overweight / obesity increase with urban residency ( $p<0.001$ ), greater age ( $p<0.002$ ), marital  
30 status different from single ( $p\leq 0.007$ ) and decrease with current smoking ( $p=0.009$ ). Among  
31 women, the proportional odds of overweight / obesity increase with urban residency ( $p<0.001$ ),  
32 primary educational level ( $P=0.01$ ), high total blood cholesterol level ( $p<0.001$ ), high fasting  
33 blood glucose level ( $p=0.02$ ), and decrease with current smoking ( $p<0.001$ ).  
34  
35  
36  
37  
38

39  
40 **Conclusion:**  
41

42 Our study showed that nearly one person out of five in the adult population of Burkina has an  
43 abnormal weight status with women being more affected than men. Urban residency is a  
44 consistent risk factor in both men and women. Alcohol consumption and education were  
45 associated with an increased odds in only women. Overnutrition needs to be recognized as an  
46 important public health issue in Burkina Faso and nutrition interventions need to be reshaped  
47 to account for it.  
48  
49  
50  
51  
52  
53  
54  
55  
56  
57  
58  
59  
60

## Strengths and limitations

### *Strengths*

- To our best knowledge, this is the first nationwide study on obesity and overweight in Burkina Faso with a country level representative sample.
- Outcomes measurements were carried out following international standards through the WHO STEPwise approach to NCDs measurement and prevention.
- Our results showed a significant prevalence of overweight/obesity in the adult population of Burkina Faso, suggesting the need of taking into account overnutrition in health policies in addition to undernutrition.

### *Limitations*

- This is a cross sectional study, which hampers our ability to derive causal inferences from the reported data;
- The Socio-economic status, a known relevant variable was not measured in the primary study;

## Introduction

Obesity is defined as an abnormal or excessive accumulation of body fat, due to an energy imbalance between intake and expenditure [1]. It is a major risk factor for many non-communicable diseases (NCD) and a real public health threat in the world[2,3]. In 2012, NCDs accounted for 68% of all deaths worldwide [4].

Obesity, a well-known phenomenon in developed countries, is increasingly common in low-middle income countries, affecting both children and adults [1,2]. Out of all World Health Organization (WHO) regions, the American's Region was the most affected with a prevalence of 27%; the least affected region was South-East Asia (5%). In the Africa region, the proportion of obese people was about 6% among men and 15% among women [4]. Thus, in low- and middle-income countries, the association of overweight / obesity with one or more nutritional deficiencies is often observed, especially among women, known as double burden of malnutrition [5]. However, data from the literature reports that excess weight can largely be avoided; and prevention involves the identification and control of modifiable risk factors[1,2]. These factors have been widely described in the literature. There are mainly related to behavior and / or knowledge (inadequate diet, inactivity, alcohol consumption,), sociodemographic factors (place of residence, socio-economic status), and clinical and metabolic factors ( total cholesterol level, HDL, triglycerides) [1,6–8].

However, the factors vary between countries, depending on eating habits and socio-cultural practices [2] . This variability of factors suggests a relevance of country specific studies to identify context specific and relevant risk factors in order to better guide and align the policies and strategies aiming to address the raising burden of obesity.

The studies conducted so far on factors associated with overweight or obesity in low-middle income countries were often conducted in urban areas [[9–13], hospitals[14,15], secondary and high schools [16–18]. There are few nationally representative data on obesity in most sub-Saharan African countries[6,19]. This scarcity of nationally representative data on the burden and risk factors for overweight/obesity is an obstacle to engaging countries in the design and implementation of adequate public health interventions.

Our study intends to fill this gap by providing more complete data on the prevalence and the risk factors for overweight and obesity, through a secondary analysis of data from the STEPS survey carried out in Burkina Faso in 2013.



## Methods

### *Study setting*

Our study was conducted in Burkina Faso, a landlocked Sahelian country in the heart of West Africa. The country is divided into 13 regions, 45 provinces and 351 municipalities. In 2013, the population was estimated at 17,271,583 inhabitants. The majority of the population lives in rural areas, with agriculture and livestock as main activities[20].

In terms of health, the country is still facing endemic-epidemic diseases, especially malaria, measles, cerebro-spinal meningitis, acute respiratory infections, diarrheal diseases and HIV / AIDS infection[21]. The prevalence of acute malnutrition in children under five years was estimated at 8.2% in 2014[22].

Mortality due to non-communicable diseases is increasing rapidly in the same time; it was estimated that 32% of all death cases were due to NCD in 2014[23].

### *Type of study*

We carried out an analytical cross-sectional study consisting of a secondary analysis of the data from the 2013 STEPS survey in Burkina Faso.

### *Study population*

The study population of the survey was composed of adults of 25 to 64-year-old who have been living in the national territory for at least six (6) months before the survey. Persons with an inability to answer questions (cognitive impairment) were excluded from the primary study. Pregnant women were excluded from our analysis.

### *Sampling*

The enumeration areas (EAs) from the 2006 General Population and Housing Census, updated in 2010 during the Demographic and Health Survey conducted in Burkina Faso (EDS-BF, 2010) were used as sampling frame. The STEPS survey was carried out on a nationally representative sample of 4800 households with 20 households per EAs, giving 240 EAs for the whole country. The sample was stratified in each of the 13 administrative regions to provide an adequate representation of the urban and rural areas. This stratification took into account the distribution

of the population depending on the urban (22.7%) and rural environment (77.3%) in Burkina Faso, giving 54 EAs for urban area and 186 EAs for rural areas across the country. Within each stratum, a three-stage cluster sampling was done as recommended by WHO for STEPS NCD risk factors screening surveys.

At the first stage, the choice of clusters or enumeration zones by administrative regions was made by a systematic draw with proportional probability to the size of the EAs.

At the second stage, a household count in each of the selected 240 clusters at the first stage provided a list of households from which a sample of 20 households was selected using a simple systematic random sampling with an Excel Spread Sheet.

At the third level, the choice of individuals within households was made randomly using Kish method [24]. In each household, an individual of 25 to 64 years old living in the household was drawn to participate in the survey.

### ***Sample Size and power of the study***

The sample size was calculated by using the following formula:

$$n = \left( \frac{Z_{\alpha}^2 * P(1 - P)}{e^2} * 1,5 * 8 \right) / 0,8$$

where  $z_{\alpha} = 1.96$  for a risk  $\alpha$  of 0.05;  $e$  = absolute margin of error on the estimate of the proportion (0.05);  $P$ : expected hypertension prevalence (0.296). The sample size was adjusted to account for the design effect (1.5), the number of age group per gender (8) and the expected non response rate (20%).

The STEPS survey was conducted on a representative sample of 4,800 individuals. Out of the 4800 participants, 152 were excluded for pregnancy, 153 for missing data (on height and / or weight) and 23 due to a lack of sampling weights. The sample that we analyzed finally included 4472 persons (See figure1 for study inclusion process). With this final sample size and assuming a prevalence of obesity of 4.5%, our study has a statistical power of 86.6% to detect an association of a magnitude of 1.5 with the  $\alpha$  threshold of 5%.

### ***Data collection***

The collection of data was carried out by nurses, graduate medical and nurse students. The data collection consisted in face-to-face interviews of selected participants using standardized

questionnaires and physical and biochemical measurements. The data collection tools were pre-tested before they were used at the national level.

Data collection teams were closely supervised by a team of supervisors composed of statisticians, epidemiologists and clinicians.

Height measurement (in cm) was made in a standing or lying position, using a portable measuring board, on the participant without shoes and hat. The weight in kg was measured using an electronic weighing scales (SECA™) placed on a stable and even surface, the person lightly dressed, shoes-off and in a standing position.

The total cholesterol and blood glucose levels were measured using a Cardiocheck™ PA SILVER kit that performs all these measurements using a capillary whole blood sample. Further details on the STEPS survey are available elsewhere[25].

### **Study Variables**

We used body mass index (BMI) to define general obesity. The BMI was calculated dividing the weight (kg) by the size (in meters) squared and then used to define undernutrition (BMI <18.5 kg / m<sup>2</sup>), normal (18.5 - 24.99 kg / m<sup>2</sup>), overweight (25.0-29.99 kg / m<sup>2</sup>) and obesity (30 kg / m<sup>2</sup>) in accordance with WHO recommendations [2]. We also used waist circumference to compute central obesity with the cut-off points of 94 cm in men and 80 cm in women[26].

Independent variables included age, marital status, place of residence, occupational activity, educational level, total cholesterol level, fasting blood glucose, smoking, alcohol consumption, the type of fat most commonly consumed and the intensity of physical activities. Some variables were recoded using specific cut-points of grouping (see Table 1).

Table 1 : Recoding of exposure variables

| <b>Variables</b>          | <b>Categories</b>                                                                                                                                                                                                            |
|---------------------------|------------------------------------------------------------------------------------------------------------------------------------------------------------------------------------------------------------------------------|
| Age groups (years)        | «25 to 34» «35 to 44» «45 to 54» «55 to 64»                                                                                                                                                                                  |
| Education level           | «None» «Primary» «Secondary and higher»                                                                                                                                                                                      |
| Marital status            | «Single» «Cohabiting/Married» «Divorced/widowed/ separated»                                                                                                                                                                  |
| Occupational status       | «Employed» «self-employed» «Unemployed» «House makers »                                                                                                                                                                      |
| Total cholesterol level   | Normal (<5.2 mmol/l); High cholesterol (≥5.2 mmol/l)                                                                                                                                                                         |
| Fasting capillary glucose | Normal (<6.1 mmol/l); High glucose (≥6.1 mmol/l)                                                                                                                                                                             |
| Cigarette smoking         | « Never » «Current smoker » « Former smoker » « Second hand smoking »                                                                                                                                                        |
| Daily alcohol consumption | <ul style="list-style-type: none"> <li>• Male : None (0 g) Low (0.01 – 39.99 g) Medium (40 - 59.99) High (60 and over)</li> <li>• Female : None (0 g) Low (0.01 – 19.99 g) Medium (20 - 39.99) High (40 and over)</li> </ul> |
| Fat intake                | «None» «Vegetable oil» « butter, lard or fat, margarine»                                                                                                                                                                     |

---

**Physical activity**

- High intensity activity: high intensity activities require an energy expenditure greater than 6 Metabolic equivalent of Task (METs). Examples include soccer playing, hole digging, regular swimming, farming etc.
  - Moderate intensity activity: moderate intensity activities require an energy expenditure of approximately 3–6 METs. Examples include cleaning, vacuuming, polishing, gardening, cycling at a regular pace or horse riding etc.
  - Low intensity activity: refers to persons who do not meet the above classifications. Here are included people with limited and no physical activity.
- 

***Statistical analysis***

The predictive variables were selected based on the literature. We carried out stratified gender based analyses. The Fischer Test was used to evaluate associations between the dependent variable and independent qualitative variables. We calculated crude proportional odds ratio (CPOR) and adjusted proportional odds ratios (APORs) using an ordinal logistic regression. The covariates selection in the multivariable analysis was based on epidemiological plausibility and literature review. All the analyses were weighted to account for the study design and we computed robust standard errors to account for the clustered nature of the data. The proportional risk assumption and the overall goodness of fit of the final models were checked before the results were reported. All the analyses were based on complete data analysis (missing data were ignored in all analyses). All analyses were carried out using the Stata 13.1 software.

***Patient and public involvement***

There has been no patient and/or public involvement in the study design, data collection, data analysis and writing of this research.

**Results*****Background characteristics of the study sample***

The socio-demographic characteristics of the individuals of the sample are presented in Table 2. Participants of the 25-34 age group were majority with 40.92%. There were 2249 women, which represents 52.6% of the participants. Participants with no educational level accounted

for 72.93% among men against 77.17% among women. The majority of the individuals were married/living in couple (86.96%).

Table 2 : Demographic and behavioural characteristics of study participants.

| Variables                     | Population   |              | Total        |
|-------------------------------|--------------|--------------|--------------|
|                               | Male n(%)    | Female n(%)  |              |
| <b>Residence</b>              |              |              |              |
| Urban                         | 454 (25.52)  | 539 (29.70)  | 993 (27.72)  |
| Rural                         | 1769 (74.48) | 1710 (70.30) | 3479 (72.28) |
| <b>Age groups</b>             |              |              |              |
| 25 - 34                       | 933 (38.09)  | 1044 (43.45) | 1977 (40.92) |
| 35 - 44                       | 560 (28.21)  | 573 (37.65)  | 1133 (27.91) |
| 45 - 54                       | 424 (20.22)  | 404 (18.49)  | 828 (19.31)  |
| 55 - 64                       | 306 (13.48)  | 228 (10.40)  | 534 (11.86)  |
| <b>Education level</b>        |              |              |              |
| None                          | 1623 (72.93) | 1832 (81.16) | 3455 (77.27) |
| Primary                       | 405 (17.85)  | 288 (13.07)  | 693 (15.33)  |
| Secondary (school) and higher | 187 (9.22)   | 129 (5.78)   | 316 (7.40)   |
| <b>Marital status</b>         |              |              |              |
| Single                        | 254 (11.04)  | 68 (3.24)    | 322 (6.93)   |
| Cohabiting/Married            | 1879 (85.74) | 1963 (88.06) | 3842 (86.96) |
| Divorced/Widowed/separated    | 87 (3.21)    | 216 (8.70)   | 303 (6.10)   |
| <b>Occupational status</b>    |              |              |              |
| Employed                      | 178 (6.68)   | 71 (3.44)    | 249 (2.92)   |
| Self-employed                 | 1945 (86.12) | 1188 (50.40) | 3133 (67.32) |
| Unemployed                    | 87 (4.51)    | 54 (2.44)    | 141 (3.42)   |
| Housemaker                    | 13 (0.70)    | 936 (43.72)  | 949 (23.34)  |

### ***Prevalence of overweight and obesity***

As shown in Table 3, the prevalence of overweight and general obesity in the sample were respectively 13.82 (CI<sub>95%</sub>: 12.25 - 15.55) and 4.84 (CI<sub>95%</sub>: 3.99 - 5.86). The prevalence of general obesity was higher among women ( $p < 0.0001$ ) and among urban residents ( $p < 0.0001$ ). However, the proportion of overweight people did not significantly differ between women and men. Among all age groups, obesity was more prevalent in the age group 35 to 44 ( $p < 0.0001$ ). The prevalence of obesity also varies across administrative regions (results not shown). The prevalence of central obesity was respectively 6.33% (CI<sub>95%</sub>: 5.11-7.81) and 34.50%

(CI95%:31.12-38.97) in men and women, with significant rural versus urban difference in both sexes ( $p<0.001$ ).

**Tableau 3 : Prevalence of underweight, overweight and general obesity among study participants.**

|                           | n           | Underweight % (95% CI)       | Overweight % (95% CI)        | Obesity % (95% CI)        |
|---------------------------|-------------|------------------------------|------------------------------|---------------------------|
| <b>Gender</b>             |             |                              |                              |                           |
| Male                      | 2223        | 8.10 (6.71 - 97.3)           | 13.91 (11.88 -16.22)         | 3.29 (2.33 - 4.62)        |
| Female                    | 2249        | 15.05 (13.19 - 17.12)        | 13.74 (11.86 -15.86)         | 6.24 (5.11 - 7.60)        |
| <b>Age groups (years)</b> |             |                              |                              |                           |
| 25 - 34                   | 1977        | 9.32 (7.76 - 11.17)          | 12.09 (10.22 - 14.24)        | 3.73 (2.69 - 5.16)        |
| 35 - 44                   | 1133        | 10.77 (8.70 - 13.25)         | 16.12 (13.35 - 19.34)        | 5.64 (4.26 - 7.43)        |
| 45 - 54                   | 828         | 14.05 (11.63 - 16.89)        | 15.75 (12.79 -19.24)         | 5.26 (3.61 - 7.61)        |
| 55 - 64                   | 534         | 18.75 (15.04 - 23.13)        | 11.22 (8.36 - 14.90)         | 6.10 (3.97 - 9.24)        |
| <b>Residence</b>          |             |                              |                              |                           |
| Rural                     | 3479        | 13.32 (11.79 - 15.03)        | 9.74 (8.33 - 11.35)          | 1.89 (1.40 - 2.53)        |
| Urban                     | 993         | 7.67 (5.09 - 11.42)          | 24.46 (20.06 - 29.47)        | 12.54 (9.75- 15.99)       |
| <b>Total</b>              | <b>4472</b> | <b>11.76 (10.40 - 13.27)</b> | <b>13.82 (12.25 - 15.55)</b> | <b>4.84 (3.99 - 5.86)</b> |

### **Risk factors for Obesity and overweight**

#### **Among men.**

In multivariable analysis, significant predictors of overweight and obesity among men included place of residence, physical activity, age, marital status, alcohol, tobacco and fat consumption. Men living in urban areas were around 3 times proportionally more likely to be at least overweight as compared to those living in rural areas (APOR: 2.84, CI95%: 1.90 - 4.23). The odds of being overweight or obese was lower within the 25 to 34 age group as compared to 35-44 years and 45-54 years. Men aged 35 to 44 years were 1.4 times proportionally more likely to be overweight or obese (APOR: 1.4, CI<sub>95%</sub>: 1.00 – 1.90). Compared to single men, men living in unions and those that are widowed or divorced were having higher proportional odds of being overweight or obese (APOR: 1.62, CI<sub>95%</sub>: 1.09 - 2.42 and APOR: 1.83, CI<sub>95%</sub>: 0.76 - 4.39). The current consumption of tobacco reduces by nearly half the proportional odds (APOR: 0.53, CI<sub>95%</sub>: 0.37 - 0.74). No significant difference was found between former and second hand smokers and men who had never smoked. The report of the consumption of butter, lard or margarine as the most often type of fat was associated with more than 30% proportional odds reduction (APOR: 0.62, CI95%: 0.39 - 0.97). The practice of physical activity was also associated with lower odds of overweight/obesity with the odds reduction increasing as the

1  
2  
3 intensity of the physical activity increases (APOR: 0.68, CI<sub>95%</sub>:0.44-1.04 and APOR:0.62,  
4 CI<sub>95%</sub>:0.42-0.93).

### 7 **Among women**

9  
10 Among women, significant risk factors included urban residence, current tobacco consumption,  
11 educational level, the type of occupation and fat consumption. Urban residential status was  
12 associated with around three-fold increase in the proportional odds of obesity or overweight  
13 (APOR 2.67, CI<sub>95%</sub>:1.89 - 3.78) as compared to rural residence. Being of primary school  
14 education level increased nearly two times the proportional odds of overweight or obesity  
15 (APOR: 1.80, CI<sub>95%</sub>:1.26-2.57) as compared to those that have not been at school (no  
16 education). The proportional odds of being at least overweight was lower among current  
17 tobacco smokers compared to non-smokers (APOR: 0.42, CI<sub>95%</sub>: 0.29 - 0.60). As compared to  
18 wage earners, women that are self-employed and those that house makers were less likely to be  
19 overweight/obese (APOR:0.45, CI<sub>95%</sub>:0.24-0.87 and APOR:0.40, CI<sub>95%</sub>:0.21-0.77). The report  
20 of butter/lard or margarine as type of fat often consumed was associated with lower odds of  
21 overweight/obesity (APOR:0.67, CI<sub>95%</sub>:0.46-0.99).

22  
23  
24  
25  
26  
27  
28  
29  
30  
31 The results of the multivariable analysis are presented in Table 4.  
32  
33  
34  
35  
36  
37  
38  
39  
40  
41  
42  
43  
44  
45  
46  
47  
48  
49  
50  
51  
52  
53  
54  
55  
56  
57  
58  
59  
60



Table 4: Risk factors for overweight and obesity among male and female adult population aged 25–64

|                                | Male (n=2223)      |         |                   |         | Female (n=2249)   |         |                   |         |
|--------------------------------|--------------------|---------|-------------------|---------|-------------------|---------|-------------------|---------|
|                                | CPOR (95% CI)      | p-value | APOR (95% CI)     | p-value | CPOR (95% CI)     | p-value | APOR (95% CI)     | p-value |
| <b>Residence area</b>          |                    |         |                   |         |                   |         |                   |         |
| Rural                          | 1.00               |         | 1.00              |         | 1.00              |         | 1.00              |         |
| Urban                          | 3.97 (2.93 -5.38)  | 0.000   | 2.84 (1.90 -4.23) | 0.000   | 3.83 (3.72 -6.28) | 0.000   | 2.67 (1.89 -3.78) | 0.000   |
| <b>Age (years)</b>             |                    |         |                   |         |                   |         |                   |         |
| 25 – 34                        | 1.00               |         | 1.00              |         | 1.00              |         | 1.00              |         |
| 35 – 44                        | 1.96 (1.39 - 2.78) | 0.000   | 1.40 (1.00 -1.90) | 0.049   | 1.29 (0.97 -1.73) | 0.081   | 1.19 (0.89 -1.59) | 0.239   |
| 45 – 54                        | 1.74 (1.18 - 2.56) | 0.005   | 1.20 (0.81 -1.65) | 0.412   | 1.46 (1.04 -2.07) | 0.030   | 1.18 (0.87 -1.61) | 0.287   |
| 55 – 64                        | 1.42 (0.90 - 2.25) | 0.133   | 0.67 (0.43 -1.04) | 0.074   | 1.40 (0.87 -2.26) | 0.168   | 1.12 (0.70 -1.80) | 0.628   |
| <b>Education</b>               |                    |         |                   |         |                   |         |                   |         |
| None                           | 1.00               |         | 1.00              |         | 1.00              |         | 1.00              |         |
| Primary                        | 1.22 (0.82 -1.80)  | 0.320   | 1.07(0.75 -1.53)  | 0.708   | 2.92 (2.09 -4.09) | 0.000   | 1.80 (1.26 -2.57) | 0.001   |
| Secondary<br>(school) and over | 3.24 (2.12 -4.95)  | 0.000   | 1.39 (0.77 -2.48) | 0.271   | 4.07 (2.56 -6.46) | 0.000   | 1.57 (0.87 -2.80) | 0.131   |
| <b>Occupation</b>              |                    |         |                   |         |                   |         |                   |         |
| Wage earners                   | 1.00               |         | 1.00              |         | 1.00              |         | 1.00              |         |
| Self-employed                  | 0.28 (0.19 -0.43)  | 0.000   | 0.98 (0.53 -1.81) | 0.959   | 0.21 (0.12 -0.36) | 0.000   | 0.45 (0.24 -0.87) | 0.017   |



|                            |                   |       |                   |       |                   |       |                   |       |
|----------------------------|-------------------|-------|-------------------|-------|-------------------|-------|-------------------|-------|
| Unemployed                 | 0.51 (0.25 -1.02) | 0.057 | 0.75 (0.35 -1.60) | 0.458 | 0.57 (0.22 -1.45) | 0.236 | 0.42 (0.14 -1.27) | 0.123 |
| House maker                |                   |       |                   |       | 0.27 (0.16 -0.47) | 0.000 | 0.40 (0.21 -0.77) | 0.006 |
| <b>Marital status</b>      |                   |       |                   |       |                   |       |                   |       |
| Single                     | 1.00              |       | 1.00              |       | 1.00              |       | 1.00              |       |
| Cohabiting/Married         | 1.30 (0.81 -2.07) | 0.271 | 1.62 (1.09 -2.42) | 0.017 | 0.66 (0.31 -1.43) | 0.297 | (1.01 -4.16)      | 0.045 |
| Divorced/Widowed/<br>ed/   | 2.13 (0.96 -4.73) | 0.063 | 1.83 (0.76 -4.39) | 0.176 | 0.72 (0.31 -1.70) | 0.459 | 1.64 (0.73 -3.68) | 0.232 |
| <b>Tobacco consumption</b> |                   |       |                   |       |                   |       |                   |       |
| Never                      | 1.00              |       | 1.00              |       | 1.00              |       | 1.00              |       |
| Current smoker             | 0.64 (0.43 -0.95) | 0.027 | 0.53 (0.37 -0.74) | 0.000 | 0.20 (0.10 -0.37) | 0.000 | 0.42 (0.29 -0.60) | 0.000 |
| Former smoker              | 1.44 (0.77 -2.71) | 0.257 | 1.10 (0.59 -2.05) | 0.756 | 0.98 (0.18 -5.21) | 0.983 | 0.55 (0.13 -2.37) | 0.426 |
| Second hand smoking        | 1.27 (0.92 -1.75) | 0.151 | 1.11 (0.82 -1.50) | 0.506 | 1.30 (0.99 -1.71) | 0.056 | 1.14 (0.87 -1.48) | 0.347 |
| <b>Alcohol</b>             |                   |       |                   |       |                   |       |                   |       |
| None                       | 1.00              |       | 1.00              |       | 1.00              |       | 1.00              |       |
| Low                        | 1.04 (0.71 -1.51) | 0.856 | 0.96 (0.68 -1.35) | 0.811 | 0.47 (0.26 -0.85) | 0.012 | 0.69 (0.45 -1.05) | 0.081 |
| Medium                     | 1.69 (1.00 -2.82) | 0.047 | 1.87 (1.20 -2.93) | 0.006 | 1.44 (1.00 -2.07) | 0.047 | 1.17 (0.82 -1.68) | 0.386 |
| High                       | 1.52 (0.74 -3.13) | 0.257 | 1.38 (0.77 -2.46) | 0.276 | 1.21 (0.57 -2.59) | 0.620 | 0.71 (0.38 -1.32) | 0.280 |
| <b>Fat used</b>            |                   |       |                   |       |                   |       |                   |       |

1  
2  
3  
4  
5  
6  
7  
8  
9  
10  
11  
12  
13  
14  
15  
16  
17  
18  
19  
20  
21  
22  
23  
24  
25  
26  
27  
28  
29  
30  
31  
32  
33  
34  
35  
36  
37  
38  
39  
40  
41  
42  
43  
44  
45  
46

| None                           | 1.00              |       | 1.00              |       | 1.00              |       | 1.00              |       |
|--------------------------------|-------------------|-------|-------------------|-------|-------------------|-------|-------------------|-------|
| Vegetable oil                  | 1.10 (0.71 -1.71) | 0.658 | 0.85 (0.56 -1.30) | 0.461 | 2.00 (1.27 -3.18) | 0.03  | 1.04 (0.72 -1.52) | 0.829 |
| Butter, lard or fat, margarine | 0.48 (0.28 -0.81) | 0.006 | 0.62 (0.39 -0.97) | 0.037 | 0.73 (0.44 -1.23) | 0.240 | 0.67 (0.46 -0.99) | 0.045 |
| <b>Physical activity</b>       |                   |       |                   |       |                   |       |                   |       |
| Low intensity                  | 1.00              |       | 1.00              |       | 1.00              |       | 1.00              |       |
| Moderate intensity:            | 0.58 (0.38 -0.90) | 0.016 | 0.68 (0.44 -1.04) | 0.076 | 0.76 (0.53 -1.10) | 0.147 | 0.94 (0.66 -1.33) | 0.581 |
| High intensity                 | 0.44 (0.30 -0.65) | 0.000 | 0.62 (0.42 -0.93) | 0.021 | 0.55 (0.39 -0.76) | 0.000 | 0.88 (0.63 -1.23) | 0.449 |

*CPOR : Crude proportional odds ratio ; APOR : Adjusted proportional odds ratio ; CI : Confidence interval*

## Discussion

### *Prevalence of overweight and obesity*

The overall prevalence of overweight was relatively high in our study, with no significant difference between men and women. Studies in Africa have also found similar prevalence among both sex[19,27]. However, some authors reported higher proportion of overweight among men[28–30]. The prevalence of obesity in our study was around 5% with disparities found across regions.

The prevalence of obesity was higher among women. Several other studies also reported higher prevalence of obesity among women[6,7,31,32]. Hormonal effects, especially among older ages, women's maternity and lifestyle, and certain cultural conceptions, may be contributing to this higher burden of obesity among women[33].

### *Factors associated with obesity*

Living in urban areas and current tobacco consumption are factors associated with obesity or overweight among both genders. Van Der and all in Gambia[6], also noted that risk in urban areas was about 3 times higher than in rural areas (OR: 2.86, 95% CI: 1.89 - 4 , 35). Abubakari et al. in a meta-analysis of studies conducted in sub-Saharan Africa[8] also noted that the risk was higher in urban areas (OR: 2.70, 95% CI, 1.76-4.15). This high risk could be explained by more sedentary lifestyle in urban areas as previously mentioned. In addition, in urban areas, eating patterns are different from that of rural areaq with more sugar and fats rich food known as "urban" or "western" foods[5]. Current tobacco consumption was inversely associated with the occurrence of overweight or obesity within both genders. Results from other studies reported that smoking for a long period tends to lead to weight loss. Similarly, cessation of tobacco consumption goes along with weight gain[34,35]. However, because smoking is an exposure with well-known detrimental consequences on health, the observed association between smoking and overweight/obesity shouldn't be interpreted as being in favor of smoking as a strategy to prevent obesity/overweight.

Other factors associated with overweight or obesity among men were age, marital status, consumption of butter /lard / margarine, and physical activity. Several authors also reported a positive association between the risk of obesity and age [9,12,29]. Aging leads to less physical activity and combined with greater socio-economic status, increase the ability to access diverse foods. The use of butter / fat / margarine as the main source of lipid was inversely associated with obesity in our data. This is an unexpected result as one would expect a lower risk of

1  
2  
3 overweight and obesity among those that use predominantly vegetable oil. The lack of  
4 quantification of the consumption of the different types of oil makes difficult the comparison.  
5  
6 Physical activity was associated with significant decrease in the odds of obesity only in men  
7 and not in women in our data. Other studies carried out by Pasquet et al. in Cameroon[11] and  
8 Oladimeji in Nigeria[13] revealed that the practice of intensive physical activity reduces  
9 significantly the risk of obesity.  
10  
11

12  
13  
14 Indeed, the intensive physical activity leads to an increase in the energy expenditure, avoids fat  
15 deposition and promotes a development of the muscular mass [36]. Men living in union were  
16 about 60% more likely to be obese compared to single men. There was an association in the  
17 same direction in women. There is a correlation between marital status and socio-economic  
18 position. In our study, we lack data on the socio-economic status and we used education status  
19 as a proxy. Our findings of a positive correlation between being married and overweight/obesity  
20 may have been confounded by the socio-economic status.  
21  
22

23  
24  
25 Among women, education was associated with obesity/overweight. However, in their study  
26 among women living in urban areas, Benkeser et al. in Ghana [33] did not find a relation  
27 between educational level and obesity. This could be explained by the fact that their study was  
28 exclusively carried out in urban areas where the heterogeneity between educational statuses  
29 may be lesser. We found difference in predictors of overweight/obesity between men and  
30 women. Physical activity and age were significant predictors in men and not in women, while  
31 the education status and the type of employment were significant predictors in only women.  
32 These results are in favor of gender specific predictors for overweight/obesity and are in support  
33 of gender-based stratified analyses.  
34  
35  
36  
37  
38  
39  
40  
41  
42

### 43 ***Limitations of the study***

44  
45 The results reported in this study are derived from a cross sectional study limiting our ability to  
46 derive causal inferences from the observed associations. Exposures measurements were mainly  
47 based on a short window recall as it is usual in this type of studies, hampering the possibility to  
48 get further attributes (quantity, duration etc.) on some exposures such as fat and fruit  
49 consumptions, that would have been invaluable in the interpretation of the results. We did not  
50 have information on socio-economic status that is a known key variable when trying to predict  
51 overnutrition. Furthermore, the analysis carried out and our interpretation of the results assume  
52 that an overweight person is in transition to obese status. While this is conceptually true, we  
53  
54  
55  
56  
57  
58  
59  
60

1  
2  
3 cannot rule out that an overweight person will turn to be normal in the future, particularly in a  
4 setting where food insecurity is common.  
5  
6

## 7 **Conclusion**

8  
9 Our study showed an important burden of obesity and overweight in the adult population with  
10 women more affected than men. Overnutrition needs to be recognized as an important public  
11 health issue. The country is witnessing the double burden of malnutrition with the coexistence  
12 of overnutrition and undernutrition. Nutrition interventions need to be reshaped to account for  
13 this epidemiological picture of malnutrition in Burkina Faso.  
14  
15  
16  
17  
18  
19  
20

## 21 **Abbreviations**

22  
23 BMI: body mass index; CI: confidence interval; CPOR : Crude proportional odds ratio ;  
24 APOR : Adjusted proportional odds ratio ; WHO : World health organization.  
25  
26  
27

## 28 **Acknowledgements**

29  
30 This research was carried out by SK as partial fulfilment of his master program in public health  
31 at the African Institute of Public Health. SK was granted funds by the Ministry of Health of  
32 Burkina Faso for his master's program.  
33  
34  
35

36 The authors are grateful to the Ministry of Health for giving access to the data. We would also  
37 like to thank the African Institute of Public Health for the logistic support to the drafting of the  
38 article.  
39  
40  
41

## 42 **Funding**

43  
44 This work is a secondary analysis of data from the STEPS survey. Authors didn't receive  
45 funding for this work.  
46  
47

## 48 **Data availability statement**

49  
50 The STEPS 2013 survey database was used for this study. The dataset can be obtained at the  
51 Ministry of Health upon reasonable request. Any request for further analysis can be submitted  
52 to Dr Brice Bicaba [bicababrico78@gmail.com](mailto:bicababrico78@gmail.com). No further additional data is available.  
53  
54  
55  
56  
57  
58  
59  
60

### Authors contribution

SK1, MT and SK2 designed the study and SK1 drafted the paper. SK1 and MT performed initial analysis and MT reanalysed the data. SK2, BB, JS and HL made substantial contributions to the interpretation of the data. All authors read and approved the final manuscript.

### Conflicts of interest

None

### Consent for publication

Not applicable.

### Ethical considerations

The STEPS survey got approval from the Ethics Committee for Health Research (Deliberation No. 2012-12-092 of 05 December 2012). Written informed consent was obtained before inclusion in the study. For this study, we obtained an authorization from the General directorate of Health to reanalyze the data and the confidentiality of study participants was preserved.

### Figure legend

Figure 1: Diagram flow of the study participants. This figure shows the criteria that were used to select the study participants in our study and the numbers that were affected by these criteria and the final sample size of the study.

## References

1. OMS | Obésité et surpoids [Internet]. WHO. Disponible sur: <http://www.who.int/>
2. World Health Organization. Obesity: Preventing and managing the global epidemic. Geneva: World Health Organization; 2000.
3. DELPEUCH E, MAIRE B. Obésité et développement des pays du sud. *Med Trop.* 1997;57(4):380-8.
4. World Health Organization. Global status report on noncommunicable diseases 2014: attaining the nine global noncommunicable diseases targets; a shared responsibility. Geneva: World Health Organization; 2014.
5. Zeba ANZ. Transition nutritionnelle et double fardeau de la malnutrition chez des adultes de Ouagadougou au Burkina Faso (Afrique de l'Ouest) [PhD]. [Canada]: Université de Montreal; 2012.
6. van der Sande MAB, Bailey R, Faal H, Banya WAS, Dolin P, Nyan OA, et al. Nationwide prevalence study of hypertension and related non-communicable diseases in The Gambia. *Trop Med Int Health.* nov 1997;2(11):1039-48.
7. Njelekela M, Ikeda K, Mtabaji J, Yamori Y. Obesity and other risk factors for cardiovascular diseases among Africans: results from CARDIAC study in Tanzania. *Int Congr Ser.* mai 2004;1262:372-5.
8. Abubakari AR, Lauder W, Agyemang C, Jones M, Kirk A, Bhopal RS. Prevalence and time trends in obesity among adult West African populations: a meta-analysis. *Obes Rev.* juill 2008;9(4):297-311.
9. Sagna Y. Obesity and Metabolic Syndrome in a Burkina Faso Urban Area: Prevalence, Associated Factors and Comorbidities. *J Nutr Disord Ther.* nov 2014;04(02).
10. Fezeu L. Association between socioeconomic status and adiposity in urban Cameroon. *Int J Epidemiol.* 4 juill 2005;35(1):105-11.
11. Pasquet P, Temgoua LS, Melaman-Sego F, Froment A, Rikong-Adié H. Prevalence of overweight and obesity for urban adults in Cameroon. *Ann Hum Biol.* janv 2003;30(5):551-62.
12. Maruf FA, Udoji NV. Prevalence and Socio-Demographic Determinants of Overweight and Obesity in a Nigerian Population. *J Epidemiol.* 2015;25(7):475-81.
13. Oladimeji AM, Fawole O, Nguku P, Nsubuga P. Prevalence and factors associated with hypertension and obesity among civil servants in Kaduna, Kaduna State, June 2012. *Pan Afr Med J.* 2014;18(Suppl 1).

14. Tene Marceline Y. Obesity, Central Obesity, Overweight and Diabetes: Women are the Most Affected in Burkina Faso. *J Womens Health Care*. 2014;03(03).
15. Pessinaba S, Yayehd K, Pio M, Baragou R, Afassinou Y, Tchérou T, et al. L'obésité en consultation cardiologique à Lomé: prévalence et facteurs de risque cardio-vasculaire associés-étude chez 1200 patients. *Pan Afr Med J*. 2013;12(1).
16. Mabilia-Babela J-R, Sabaye Alima J, Monabeka HG, Mbika Cardorelle A, Nkoua J-L, Moyen G. Profil épidémiologique et clinique de l'obésité de l'enfant à Brazzaville (Congo). *Cah Nutr Diététique*. nov 2011;46(5):259-62.
17. Koueta F, Dao L, Dao F, Djekompté S, Sawadogo J, Diarra Y, et al. Facteurs associés au surpoids et à l'obésité des élèves de Ouagadougou (Burkina Faso). *Santé*. 2011;21(4):5.
18. Kramoh KE, N'goran YNK, Aké-Traboulsi E, Boka BC, Harding DE, Koffi DBJ, et al. Prévalence de l'obésité en milieu scolaire en Côte d'Ivoire. *Ann Cardiol Angéiologie*. juin 2012;61(3):145-9.
19. Msyamboza KP, Kathyola D, Dzewela T. Anthropometric measurements and prevalence of underweight, overweight and obesity in adult Malawians: nationwide population based NCD STEPS survey. *Pan Afr Med J [Internet]*. 24 juill 2013 [cité 12 mars 2017];15. Disponible sur: <http://www.ncbi.nlm.nih.gov/pmc/articles/PMC3828071/>
20. Institut National de la démographie. Recensement général de la population et de l'habitation de 2006. Burkina Faso; 2008. 52 p.
21. Ministère de la santé. Annuaire statistique 2014. Burkina Faso; 2015 p. 330.
22. Ministère de la santé. Rapport de l'enquete nutritionnelle nationale. Burkina Faso; 2014 p. 56.
23. Organisation mondiale de la Santé. Profils des pays pour les maladies non transmissibles (MNT), 2018.
24. Wiegand H. Kish, L.: Survey Sampling. John Wiley & Sons, Inc., New York, London 1965, IX + 643 S., 31 Abb., 56 Tab., Preis 83 s. *Biom Z*. 1 janv 1968;10(1):88-9.
25. Millogo T, Bicaba BW, Soubeiga JK, Dabiré E, Médah I, Kouanda S. Diabetes and abnormal glucose regulation in the adult population of Burkina Faso: prevalence and predictors. *BMC Public Health*. déc 2018;18(1):350.
26. World Health Organization. Waist circumference and waist-hip ratio: report of a WHO expert consultation, Geneva, 8-11 December 2008. Geneva: World Health Organization; 2011.
27. Adebayo RA, Balogun MO, Adedoyin RA, Obashoro-John OA, Bisiriyu LA, Abiodun OO. Prevalence and pattern of overweight and obesity in three rural



- 1  
2  
3 communities in southwest Nigeria. *Diabetes Metab Syndr Obes Targets Ther.* 10  
4 mai 2014;7:153-8.  
5
- 6  
7 28. Kamadjeu RM, Edwards R, Atanga JS, Kiawi EC, Unwin N, Mbanya J-C.  
8 Anthropometry measures and prevalence of obesity in the urban adult  
9 population of Cameroon: an update from the Cameroon Burden of Diabetes  
10 Baseline Survey. *BMC Public Health.* 2006;6(1):228.  
11
- 12 29. Kirunda BE, Fadnes LT, Wamani H, Van den Broeck J, Tylleskär T.  
13 Population-based survey of overweight and obesity and the associated factors in  
14 peri-urban and rural Eastern Uganda. *BMC Public Health.* 2015;15(1):1168.  
15
- 16 30. Gomes A, Damasceno A, Azevedo A, Prista A, Silva-Matos C, Saranga S, et al.  
17 Body mass index and waist circumference in Mozambique: urban/rural gap  
18 during epidemiological transition. *Obes Rev Off J Int Assoc Study Obes.* sept  
19 2010;11(9):627-34.  
20
- 21 31. Saeed KMI. Prevalence and associated risk factors for obesity in Jalalabad  
22 city - Afghanistan. *Alex J Med.* janv 2015;  
23
- 24 32. Cai L, He J, Song Y, Zhao K, Cui W. Association of obesity with socio-  
25 economic factors and obesity-related chronic diseases in rural southwest China.  
26 *Public Health.* mars 2013;127(3):247-51.  
27
- 28 33. Benkeser RM, Biritwum R, Hill AG. Prevalence of Overweight and Obesity and  
29 Perception of Healthy and Desirable Body Size in Urban, Ghanaian Women.  
30 *Ghana Med J.* juin 2012;46(2):66-75.  
31
- 32 34. Weg MWV, Klesges RC, DeBon M. Relationship Between Smokeless Tobacco  
33 Use and Body Weight in Young Adult Military Recruits. *Nicotine Tob Res.* 1 avr  
34 2005;7(2):301-5.  
35
- 36 35. Rodu B, Stegmayr B, Nasic S, Cole P, Asplund K. The influence of smoking  
37 and smokeless tobacco use on weight amongst men. *J Intern Med.* janv  
38 2004;255(1):102-7.  
39
- 40 36. Tremblay A, Therrien F. Physical activity and body functionality:  
41 implications for obesity prevention and treatment. *Can J Physiol Pharmacol.*  
42 févr 2006;84(2):149-56.  
43  
44  
45  
46  
47  
48  
49  
50  
51  
52  
53  
54  
55  
56  
57  
58  
59  
60

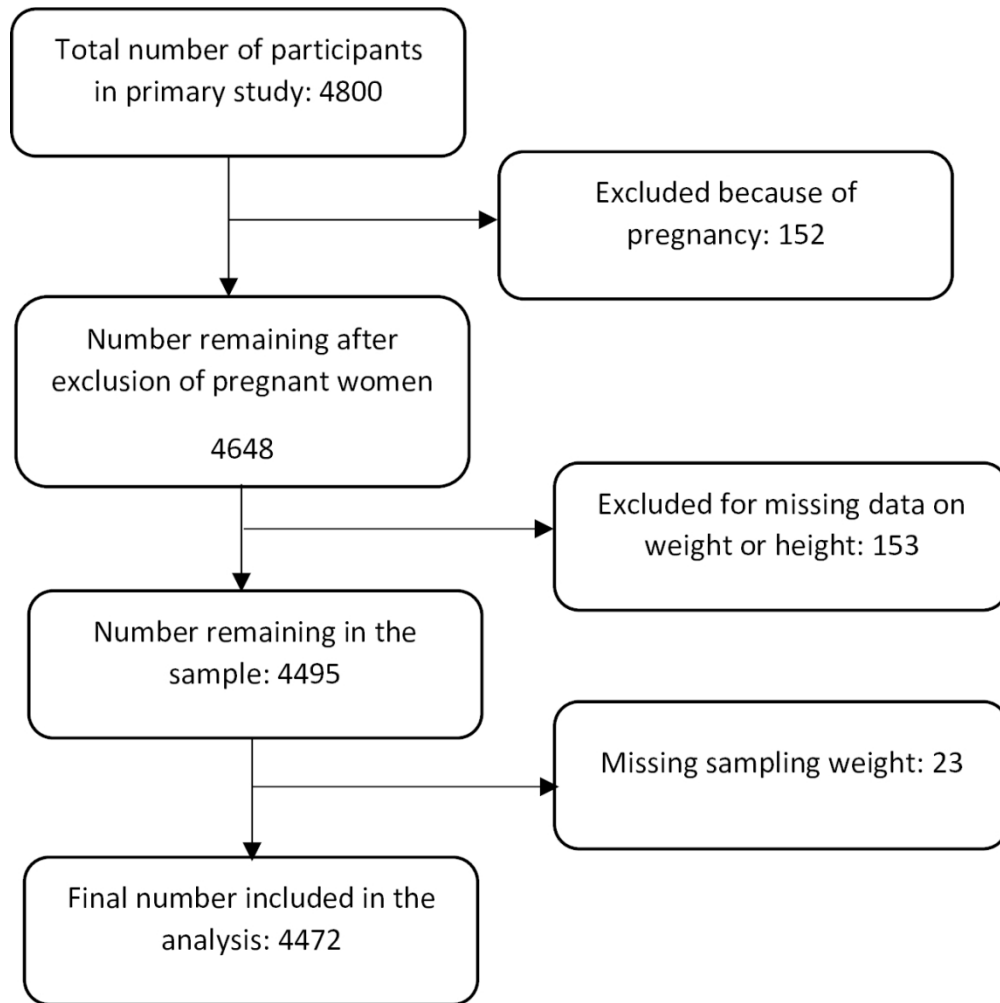

Figure 1 : Diagram flow of the study participants.

111x126mm (300 x 300 DPI)

STROBE Statement—Checklist of items that should be included in reports of *cross-sectional studies*

|                              | Item No | Recommendation                                                                                                                                                                                    | Page No     |
|------------------------------|---------|---------------------------------------------------------------------------------------------------------------------------------------------------------------------------------------------------|-------------|
| <b>Title and abstract</b>    | 1       | (a) Indicate the study's design with a commonly used term in the title or the abstract                                                                                                            | 1           |
|                              |         | (b) Provide in the abstract an informative and balanced summary of what was done and what was found                                                                                               | 2           |
| <b>Introduction</b>          |         |                                                                                                                                                                                                   |             |
| Background/rationale         | 2       | Explain the scientific background and rationale for the investigation being reported                                                                                                              | 4           |
| Objectives                   | 3       | State specific objectives, including any prespecified hypotheses                                                                                                                                  | 2&4         |
| <b>Methods</b>               |         |                                                                                                                                                                                                   |             |
| Study design                 | 4       | Present key elements of study design early in the paper                                                                                                                                           | 5           |
| Setting                      | 5       | Describe the setting, locations, and relevant dates, including periods of recruitment, exposure, follow-up, and data collection                                                                   | 5           |
| Participants                 | 6       | (a) Give the eligibility criteria, and the sources and methods of selection of participants                                                                                                       | 5&6         |
| Variables                    | 7       | Clearly define all outcomes, exposures, predictors, potential confounders, and effect modifiers. Give diagnostic criteria, if applicable                                                          | 7&8         |
| Data sources/<br>measurement | 8*      | For each variable of interest, give sources of data and details of methods of assessment (measurement). Describe comparability of assessment methods if there is more than one group              | 8           |
| Bias                         | 9       | Describe any efforts to address potential sources of bias                                                                                                                                         | 7&8         |
| Study size                   | 10      | Explain how the study size was arrived at                                                                                                                                                         | 6           |
| Quantitative variables       | 11      | Explain how quantitative variables were handled in the analyses. If applicable, describe which groupings were chosen and why                                                                      | 8           |
| Statistical methods          | 12      | (a) Describe all statistical methods, including those used to control for confounding                                                                                                             | 9           |
|                              |         | (b) Describe any methods used to examine subgroups and interactions                                                                                                                               | 9           |
|                              |         | (c) Explain how missing data were addressed                                                                                                                                                       | 9           |
|                              |         | (d) If applicable, describe analytical methods taking account of sampling strategy                                                                                                                | 9           |
|                              |         | (e) Describe any sensitivity analyses                                                                                                                                                             | None        |
| <b>Results</b>               |         |                                                                                                                                                                                                   |             |
| Participants                 | 13*     | (a) Report numbers of individuals at each stage of study—eg numbers potentially eligible, examined for eligibility, confirmed eligible, included in the study, completing follow-up, and analysed | 7& figure 1 |
|                              |         | (b) Give reasons for non-participation at each stage                                                                                                                                              | 7& figure 1 |
|                              |         | (c) Consider use of a flow diagram                                                                                                                                                                | Figure 1    |
| Descriptive data             | 14*     | (a) Give characteristics of study participants (eg demographic, clinical, social) and information on exposures and potential confounders                                                          | 9&10        |
|                              |         | (b) Indicate number of participants with missing data for each variable of interest                                                                                                               | 10          |

|                          |     |                                                                                                                                                                                                              |               |
|--------------------------|-----|--------------------------------------------------------------------------------------------------------------------------------------------------------------------------------------------------------------|---------------|
| Outcome data             | 15* | Report numbers of outcome events or summary measures                                                                                                                                                         | 10&11         |
| Main results             | 16  | (a) Give unadjusted estimates and, if applicable, confounder-adjusted estimates and their precision (eg, 95% confidence interval). Make clear which confounders were adjusted for and why they were included | 11&12&13&14   |
|                          |     | (b) Report category boundaries when continuous variables were categorized                                                                                                                                    | 10            |
|                          |     | (c) If relevant, consider translating estimates of relative risk into absolute risk for a meaningful time period                                                                                             | None included |
| Other analyses           | 17  | Report other analyses done—eg analyses of subgroups and interactions, and sensitivity analyses                                                                                                               | 11-15         |
| <b>Discussion</b>        |     |                                                                                                                                                                                                              |               |
| Key results              | 18  | Summarise key results with reference to study objectives                                                                                                                                                     | 16            |
| Limitations              | 19  | Discuss limitations of the study, taking into account sources of potential bias or imprecision. Discuss both direction and magnitude of any potential bias                                                   | 3&16          |
| Interpretation           | 20  | Give a cautious overall interpretation of results considering objectives, limitations, multiplicity of analyses, results from similar studies, and other relevant evidence                                   | 16            |
| Generalisability         | 21  | Discuss the generalisability (external validity) of the study results                                                                                                                                        | 16&17         |
| <b>Other information</b> |     |                                                                                                                                                                                                              |               |
| Funding                  | 22  | Give the source of funding and the role of the funders for the present study and, if applicable, for the original study on which the present article is based                                                | 18            |

\*Give information separately for exposed and unexposed groups.

**Note:** An Explanation and Elaboration article discusses each checklist item and gives methodological background and published examples of transparent reporting. The STROBE checklist is best used in conjunction with this article (freely available on the Web sites of PLoS Medicine at <http://www.plosmedicine.org/>, Annals of Internal Medicine at <http://www.annals.org/>, and Epidemiology at <http://www.epidem.com/>). Information on the STROBE Initiative is available at [www.strobe-statement.org](http://www.strobe-statement.org).

# BMJ Open

## Prevalence and risk factors for Overweight and obesity: a cross sectional countrywide study in Burkina Faso

|                                 |                                                                                                                                                                                                                                                                                                                                                                                                                                                                                                                                                                                    |
|---------------------------------|------------------------------------------------------------------------------------------------------------------------------------------------------------------------------------------------------------------------------------------------------------------------------------------------------------------------------------------------------------------------------------------------------------------------------------------------------------------------------------------------------------------------------------------------------------------------------------|
| Journal:                        | <i>BMJ Open</i>                                                                                                                                                                                                                                                                                                                                                                                                                                                                                                                                                                    |
| Manuscript ID                   | bmjopen-2019-032953.R2                                                                                                                                                                                                                                                                                                                                                                                                                                                                                                                                                             |
| Article Type:                   | Original research                                                                                                                                                                                                                                                                                                                                                                                                                                                                                                                                                                  |
| Date Submitted by the Author:   | 26-Aug-2020                                                                                                                                                                                                                                                                                                                                                                                                                                                                                                                                                                        |
| Complete List of Authors:       | Kaboré, Seydou; African Institute of Public Health; Ministry of Health Burkina Faso,<br>Millogo, Tieba; African Institute of Public Health; Institut de Recherche en Sciences de la Sante<br>Soubeiga, Joseph; African Institute of Public Health; Ministry of Health Burkina Faso<br>Lanou, Hermann; Institut de Recherche en Sciences de la Sante; African Institute of Public Health<br>Bicaba, Brice; African Institute of Public Health; Ministry of Health Burkina Faso<br>Kouanda, Seni; Institut de Recherche en Sciences de la Santé; African Institute of Public Health, |
| <b>Primary Subject Heading</b>: | Epidemiology                                                                                                                                                                                                                                                                                                                                                                                                                                                                                                                                                                       |
| Secondary Subject Heading:      | Nutrition and metabolism                                                                                                                                                                                                                                                                                                                                                                                                                                                                                                                                                           |
| Keywords:                       | nutritionnal epidemiology, EPIDEMIOLOGY, NUTRITION & DIETETICS                                                                                                                                                                                                                                                                                                                                                                                                                                                                                                                     |
|                                 |                                                                                                                                                                                                                                                                                                                                                                                                                                                                                                                                                                                    |

SCHOLARONE™  
Manuscripts

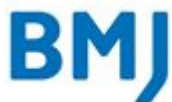

I, the Submitting Author has the right to grant and does grant on behalf of all authors of the Work (as defined in the below author licence), an exclusive licence and/or a non-exclusive licence for contributions from authors who are: i) UK Crown employees; ii) where BMJ has agreed a CC-BY licence shall apply, and/or iii) in accordance with the terms applicable for US Federal Government officers or employees acting as part of their official duties; on a worldwide, perpetual, irrevocable, royalty-free basis to BMJ Publishing Group Ltd ("BMJ") its licensees and where the relevant Journal is co-owned by BMJ to the co-owners of the Journal, to publish the Work in this journal and any other BMJ products and to exploit all rights, as set out in our [licence](#).

The Submitting Author accepts and understands that any supply made under these terms is made by BMJ to the Submitting Author unless you are acting as an employee on behalf of your employer or a postgraduate student of an affiliated institution which is paying any applicable article publishing charge ("APC") for Open Access articles. Where the Submitting Author wishes to make the Work available on an Open Access basis (and intends to pay the relevant APC), the terms of reuse of such Open Access shall be governed by a Creative Commons licence – details of these licences and which [Creative Commons](#) licence will apply to this Work are set out in our licence referred to above.

Other than as permitted in any relevant BMJ Author's Self Archiving Policies, I confirm this Work has not been accepted for publication elsewhere, is not being considered for publication elsewhere and does not duplicate material already published. I confirm all authors consent to publication of this Work and authorise the granting of this licence.

1  
2  
3 **Prevalence and risk factors for overweight and obesity: a cross sectional**  
4 **countrywide study in Burkina Faso.**  
5  
6  
7  
8  
9

10 **Authors**

11 1. Seydou Kaboré, PharmD, MPH

12 Institut Africain de santé publique & Ministère de la Santé, Ouagadougou, Burkina Faso  
13 [seydoupfarm@yahoo.fr](mailto:seydoupfarm@yahoo.fr)

14 2. Tieba Millogo, MD, MSc, PhD (c)

15 Institut Africain de santé publique & Institut de Recherche en Sciences de la Santé,  
16 Ouagadougou, Burkina Faso  
17 [millogorod@gmail.com](mailto:millogorod@gmail.com)

18 3. Joseph Kouesyandé Soubeiga, MD, MPH

19 Ministère de la Santé, Ouagadougou, Burkina Faso  
20 [ksoubeiga@yahoo.fr](mailto:ksoubeiga@yahoo.fr)

21 4. Hermann Lanou, MD, MSc, PhD (c)

22 Institut Africain de santé publique & Institut de Recherche en Sciences de la Santé,  
23 Ouagadougou, Burkina Faso  
24 [hlanou@yahoo.ca](mailto:hlanou@yahoo.ca)

25 5. Brice W Bicaba , MD, MPH.

26 Ministry of Health, Burkina Faso  
27 [bicaba\\_brico@yahoo.fr](mailto:bicaba_brico@yahoo.fr)

28 6. Seni Kouanda, MD, MSc., PhD

29 Institut Africain de santé publique & Institut de Recherche en Sciences de la Santé,  
30 Ouagadougou, Burkina Faso  
31 [senikouanda@gmail.com](mailto:senikouanda@gmail.com)

32 **Corresponding Author**

33 Seni Kouanda

34 [skouanda@irss.bf](mailto:skouanda@irss.bf)

35 Institut Africain de santé publique, Deputy Director

36 PBox: 12 BP 199 Ouagadougou

37 Tel: (+226) 70261462  
38  
39  
40  
41  
42  
43  
44  
45  
46  
47  
48  
49  
50  
51  
52  
53  
54  
55  
56  
57  
58  
59  
60

1  
2  
3 **Word count:** 2929  
4

5 **Keywords:** Obesity, epidemiology of non-communicable disease, low-middle-income  
6 countries  
7

8  
9 **Abstract**  
10

11 **Objective:** The objective of this study was to determine the prevalence and predictors of  
12 overweight and obesity in Burkina Faso using a population-based country-wide sample. We  
13 hypothesize that there is a significant burden related to overweight/obesity in Burkina Faso.  
14

15  
16  
17 **Design:** Secondary analysis of a population-based country wide cross-sectional study  
18

19  
20 **Setting:** Burkina Faso, all the 13 regions including both rural and urban residential areas  
21

22 **Participants:** 4,800 participants of both sexes, aged between 25 and 64 years.  
23

24 **Main outcomes:** overweight and obesity using body mass index cut-off levels of WHO  
25

26  
27 **Results:** The prevalence of overweight and obesity in Burkina Faso were 13.82% (CI95%:  
28 12.25 - 15.55) and 4.84% (CI95%:3.99 - 5.86) respectively. Among men, the proportional odds  
29 of overweight / obesity increase with urban residency ( $p<0.001$ ), greater age ( $p<0.002$ ), marital  
30 status different from single ( $p\leq 0.007$ ) and decrease with current smoking ( $p=0.009$ ). Among  
31 women, the proportional odds of overweight / obesity increase with urban residency ( $p<0.001$ ),  
32 primary educational level ( $p=0.01$ ), high total blood cholesterol level ( $p<0.001$ ), high fasting  
33 blood glucose level ( $p=0.02$ ), and decrease with current smoking ( $p<0.001$ ).  
34  
35  
36  
37  
38

39  
40 **Conclusion:**  
41

42 Our study showed that nearly one person out of five in the adult population of Burkina has an  
43 abnormal weight status with women being more affected than men. Urban residency is a  
44 consistent risk factor in both men and women. Alcohol consumption and education were  
45 associated with an increased odds in only women. Overnutrition needs to be recognized as an  
46 important public health issue in Burkina Faso and nutrition interventions need to be reshaped  
47 to account for it.  
48  
49  
50  
51  
52  
53  
54  
55  
56  
57  
58  
59  
60



## Strengths and limitations

### *Strengths*

- To our best knowledge, this is the first nationwide study on obesity and overweight in Burkina Faso with a country level representative sample.
- Outcomes measurements were carried out following international standards through the WHO STEPwise approach to NCDs measurement and prevention.

### *Limitations*

- This is a cross sectional study, which hampers our ability to derive causal inferences from the reported data;
- The Socio-economic status, a known relevant variable was not measured in the primary study;
- Being overweight may not necessarily equate to being an obese person to be, particularly in a setting where food insecurity is common.

## Introduction

Obesity is defined as an abnormal or excessive accumulation of body fat, due to an energy imbalance between intake and expenditure [1]. It is a major risk factor for many non-communicable diseases (NCD) and a real public health threat in the world[2,3]. In 2015, high BMI contributed to 4.0 million deaths, which represented 7.1% of the deaths from all causes [4].

Obesity, a well-known phenomenon in developed countries, is increasingly common in low-middle income countries, affecting both children and adults [2,4,5]. In the Eastern Mediterranean Region, the prevalence of obesity increased in adults from 15.1% in 1980 to 20.7% in 2015. It increased from 4.1% to 4.9% in the same period among children [6]. In sub-Saharan Africa (SSA), Overweight/obesity factors accounted for 266 768 deaths, representing 3.3% of all-cause mortality [7]. Thus, in low- and middle-income countries, the association of overweight / obesity with one or more nutritional deficiencies is often observed, especially among women and known as double burden of malnutrition [8]. However, data from the literature reports that excess weight can largely be avoided; and prevention involves the identification and control of modifiable risk factors[2,5]. These factors have been widely described in the literature. There are mainly related to behavior and / or knowledge (inadequate diet, inactivity, alcohol consumption,), sociodemographic factors (place of residence, socio-economic status), and clinical and metabolic factors (total cholesterol level, HDL, triglycerides) [5,9–11].

However, the factors vary between countries, depending on eating habits and socio-cultural practices [2] . This variability of factors suggests a relevance of country specific studies to identify context specific and relevant risk factors in order to better guide and align the policies and strategies aiming to address the raising burden of obesity.

The studies conducted so far on factors associated with overweight or obesity in low-middle income countries were often conducted in urban areas [[12–16], hospitals[17,18], secondary and high schools [19–21]. There are few nationally representative data on obesity in most sub-Saharan African countries[9,22]. This scarcity of nationally representative data on the burden and risk factors for overweight/obesity is an obstacle to engaging countries in the design and implementation of adequate public health interventions.

1  
2  
3 Our study intends to fill this gap by providing more complete data on the prevalence and the  
4 risk factors for overweight and obesity, through a secondary analysis of data from the STEPS  
5 survey carried out in Burkina Faso in 2013.  
6  
7

## 8 9 **Methods**

### 10 11 ***Study setting***

12  
13 Our study was conducted in Burkina Faso, a landlocked Sahelian country in the heart of West  
14 Africa. The country is divided into 13 regions, 45 provinces and 351 municipalities. In 2013,  
15 the population was estimated at 21,478,529 inhabitants. The majority of the population lives in  
16 rural areas, with agriculture and livestock as main activities[23,24].  
17  
18

19 In terms of health, the country is still facing endemic-epidemic diseases, especially malaria,  
20 measles, cerebro-spinal meningitis, acute respiratory infections, diarrheal diseases and HIV /  
21 AIDS infection[25]. The prevalence of acute malnutrition in children under five years was  
22 estimated at 8.1% in 2019[26].  
23  
24

25 Mortality due to non-communicable diseases is increasing rapidly in the same time; it was  
26 estimated that 33% of all death cases were due to NCD in 2016[27].  
27  
28

### 29 30 31 32 33 34 ***Type of study***

35 We carried out an analytical cross-sectional study consisting of a secondary analysis of the data  
36 from the 2013 STEPS survey in Burkina Faso.  
37  
38  
39  
40  
41

### 42 43 ***Study population***

44 The study population of the survey was composed of adults of 25 to 64-year-old who have been  
45 living in the national territory for at least six (6) months before the survey. Persons with an  
46 inability to answer questions (cognitive impairment) were excluded from the primary study.  
47 Pregnant women were excluded from our analysis.  
48  
49  
50  
51

### 52 53 54 **Sampling**

55 The enumeration areas (EAs) from the 2006 General Population and Housing Census , updated  
56 in 2010 during the Demographic and Health Survey conducted in Burkina Faso (EDS-BF, 2010)  
57 were used as sampling frame. The STEPS survey was carried out on a nationally representative  
58  
59  
60

sample of 4800 households with 20 households per EAs, giving 240 EAs for the whole country. The sample was stratified in each of the 13 administrative regions to provide an adequate representation of the urban and rural areas. This stratification took into account the distribution of the population depending on the urban (22.7%) and rural environment (77.3%) in Burkina Faso, giving 54 EAs for urban area and 186 EAs for rural areas across the country. Within each stratum, a three-stage cluster sampling was done as recommended by WHO for STEPS NCD risk factors screening surveys.

At the first stage, the choice of clusters or enumeration zones by administrative regions was made by a systematic draw with proportional probability to the size of the EAs.

At the second stage, a household count in each of the selected 240 clusters at the first stage provided a list of households from which a sample of 20 households was selected using a simple systematic random sampling with an Excel Spread Sheet.

At the third level, the choice of individuals within households was made randomly. Once a household is selected, the interviewer creates a listing (sampling frame) of all eligible adults in the household. The listing includes the following variables: name, gender, relationship to the household head and age. Once the listing is created, each eligible member is assigned a unique number. Then using a randomized response table (Kish table), a particular member is chosen for the interview [28]. In each household, an individual of 25 to 64 years old living in the household was drawn to participate in the survey.

### ***Sample Size and power of the study***

The sample size was calculated by using the following formula:

$$n = \frac{\left( \frac{Z_{\alpha}^2 * P(1 - P)}{e^2} * 1.5 * 8 \right)}{0.8} = \frac{\left( \frac{1.96^2 * 0.296(1 - 0.296)}{0.05^2} * 1.5 * 8 \right)}{0.8}$$

where  $z_{\alpha} = 1.96$  for a risk  $\alpha$  of 0.05;  $e$  = absolute margin of error on the estimate of the proportion (0.05);  $P$ : expected hypertension prevalence (0.296). The sample size was adjusted to account for the design effect (1.5), the number of age group per gender (8) and the expected non response rate (20%).

The STEPS survey was conducted on a representative sample of 4,800 individuals. Out of the 4800 participants, 152 were excluded for pregnancy, 153 for missing data (on height and / or

weight) and 23 due to a lack of sampling weights. The sample that we analyzed finally included 4472 persons (See figure 1 for study inclusion process). With this final sample size and assuming a prevalence of obesity of 4.5%, our study has a statistical power of 86.6% to detect an association of a magnitude of 1.5 with the  $\alpha$  threshold of 5%.

### ***Data collection***

The collection of data was carried out by nurses, graduate medical and nurse students. The data collection consisted in face-to-face interviews of selected participants using standardized questionnaires and physical and biochemical measurements. The data collection tools were pre-tested before they were used at the national level.

Data collection teams were closely supervised by a team of supervisors composed of statisticians, epidemiologists and clinicians.

Height measurement (in cm) was made in a standing or lying position, using a portable measuring board, on the participant without shoes and hat. The weight in kg was measured using an electronic weighing scales (SECA™) placed on a stable and even surface, the person lightly dressed, shoes-off and in a standing position.

The total cholesterol and blood glucose levels were measured using a Cardiocheck™ PA SILVER kit that performs all these measurements using a capillary whole blood sample. Further details on the STEPS survey are available elsewhere[29].

### ***Patient and public involvement***

No patient involved in this research.

### ***Study Variables***

We used body mass index (BMI) to define general obesity. The BMI was calculated dividing the weight (kg) by the size (in meters) squared and then used to define undernutrition (BMI <18.5 kg / m<sup>2</sup>), normal (18.5 - 24.99 kg / m<sup>2</sup>), overweight (25.0-29.99 kg / m<sup>2</sup>) and obesity (30 kg / m<sup>2</sup>) in accordance with WHO recommendations [2]. We also used waist circumference to compute central obesity with the cut-off points of 94 cm in men and 80 cm in women[30].

Independent variables included age, marital status, place of residence, occupational activity, educational level, total cholesterol level, fasting blood glucose, smoking, alcohol consumption, the type of fat most commonly consumed and the intensity of physical activities. Some variables were recoded using specific cut-points of grouping (see Table 1).

Table 1 : Recoding of exposure variables

| Variables                 | Categories                                                                                                                                                                                                                                                                                                                                                                                                                                                                                                                                                                                                                                                                       |
|---------------------------|----------------------------------------------------------------------------------------------------------------------------------------------------------------------------------------------------------------------------------------------------------------------------------------------------------------------------------------------------------------------------------------------------------------------------------------------------------------------------------------------------------------------------------------------------------------------------------------------------------------------------------------------------------------------------------|
| Age groups (years)        | «25 to 34» «35 to 44» «45 to 54» «55 to 64»                                                                                                                                                                                                                                                                                                                                                                                                                                                                                                                                                                                                                                      |
| Education level           | «None» «Primary» «Secondary and higher»                                                                                                                                                                                                                                                                                                                                                                                                                                                                                                                                                                                                                                          |
| Marital status            | «Single» «Cohabiting/Married» «Divorced/widowed/ separated»                                                                                                                                                                                                                                                                                                                                                                                                                                                                                                                                                                                                                      |
| Occupational status       | «Employed» «self-employed» «Unemployed» «House makers »                                                                                                                                                                                                                                                                                                                                                                                                                                                                                                                                                                                                                          |
| Total cholesterol level   | Normal (<5.2 mmol/l); High cholesterol (≥5.2 mmol/l)                                                                                                                                                                                                                                                                                                                                                                                                                                                                                                                                                                                                                             |
| Fasting capillary glucose | Normal (<6.1 mmol/l); High glucose (≥6.1 mmol/l)                                                                                                                                                                                                                                                                                                                                                                                                                                                                                                                                                                                                                                 |
| Cigarette smoking         | « Never » «Current smoker » « Former smoker » « Second hand smoking »                                                                                                                                                                                                                                                                                                                                                                                                                                                                                                                                                                                                            |
| Daily alcohol consumption | <ul style="list-style-type: none"> <li>• Male : None (0 g) Low (0.01 – 39.99 g) Medium (40 - 59.99) High (60 and over)</li> <li>• Female : None (0 g) Low (0.01 – 19.99 g) Medium (20 - 39.99) High (40 and over)</li> </ul>                                                                                                                                                                                                                                                                                                                                                                                                                                                     |
| Fat intake                | «None» «Vegetable oil» « butter, lard or fat, margarine»                                                                                                                                                                                                                                                                                                                                                                                                                                                                                                                                                                                                                         |
| Physical activity         | <ul style="list-style-type: none"> <li>• High intensity activity: high intensity activities require an energy expenditure greater than 6 Metabolic equivalent of Task (METs). Examples include soccer playing, hole digging, regular swimming, farming etc.</li> <li>• Moderate intensity activity: moderate intensity activities require an energy expenditure of approximately 3–6 METs. Examples include cleaning, vacuuming, polishing, gardening, cycling at a regular pace or horse riding etc.</li> <li>• Low intensity activity: refers to persons who do not meet the above classifications. Here are included people with limited and no physical activity.</li> </ul> |

### ***Statistical analysis***

The predictive variables were selected based on the literature. We carried out stratified gender based analyzes. The Fisher Test was used to evaluate associations between the dependent variable and independent qualitative variables. We calculated crude proportional odds ratio (CPOR) and adjusted proportional odds ratios (APORs) using an ordinal logistic regression. The covariates selection in the multivariable analysis was based on epidemiological plausibility and literature review. All the analyses were weighted to account for the study design and we computed robust standard errors to account for the clustered nature of the data. The proportional risk assumption and the overall goodness of fit of the final models were checked before the results were reported. All the analyses were based on complete data analysis (missing data were ignored in all analyzes). All analyzes were carried out using the Stata 13.1 software.

## Results

### *Background characteristics of the study sample*

The socio-demographic characteristics of the individuals of the sample are presented in Table 2. Participants of the 25-34 age group were majority with 40.92%. There were 2249 women, which represents 52.6% of the participants. Participants with no educational level accounted for 72.93% among men against 77.17% among women. The majority of the individuals were married/living in couple (86.96%).

Table 2 : Demographic and behavioural characteristics of study participants.

| Variables                     | Population   |              | Total        |
|-------------------------------|--------------|--------------|--------------|
|                               | Male n(%)    | Female n(%)  |              |
| <b>Residence</b>              |              |              |              |
| Urban                         | 454 (25.52)  | 539 (29.70)  | 993 (27.72)  |
| Rural                         | 1769 (74.48) | 1710 (70.30) | 3479 (72.28) |
| <b>Age groups</b>             |              |              |              |
| 25 - 34                       | 933 (38.09)  | 1044 (43.45) | 1977 (40.92) |
| 35 - 44                       | 560 (28.21)  | 573 (37.65)  | 1133 (27.91) |
| 45 - 54                       | 424 (20.22)  | 404 (18.49)  | 828 (19.31)  |
| 55 - 64                       | 306 (13.48)  | 228 (10.40)  | 534 (11.86)  |
| <b>Education level</b>        |              |              |              |
| None                          | 1623 (72.93) | 1832 (81.16) | 3455 (77.27) |
| Primary                       | 405 (17.85)  | 288 (13.07)  | 693 (15.33)  |
| Secondary (school) and higher | 187 (9.22)   | 129 (5.78)   | 316 (7.40)   |
| <b>Marital status</b>         |              |              |              |
| Single                        | 254 (11.04)  | 68 (3.24)    | 322 (6.93)   |
| Cohabiting/Married            | 1879 (85.74) | 1963 (88.06) | 3842 (86.96) |
| Divorced/Widowed/separated    | 87 (3.21)    | 216 (8.70)   | 303 (6.10)   |
| <b>Occupational status</b>    |              |              |              |
| Employed                      | 178 (6.68)   | 71 (3.44)    | 249 (2.92)   |
| Self-employed                 | 1945 (86.12) | 1188 (50.40) | 3133 (67.32) |
| Unemployed                    | 87 (4.51)    | 54 (2.44)    | 141 (3.42)   |
| Housemaker                    | 13 (0.70)    | 936 (43.72)  | 949 (23.34)  |

### *Prevalence of overweight and obesity*

As shown in Table 3, the prevalence of overweight and general obesity in the sample were respectively 13.82 (CI<sub>95%</sub>: 12.25 - 15.55) and 4.84 (CI<sub>95%</sub>: 3.99 - 5.86). The prevalence of general obesity was higher among women (p < 0.0001) and among urban residents (p < 0.0001). However, the proportion of overweight people did not significantly differ between women and men. Among all age groups, obesity was more prevalent in the age group 35 to 44 (p < 0.0001). The prevalence of obesity also varies across administrative regions (results not shown). The



prevalence of central obesity was respectively 6.33% (CI95%: 5.11-7.81) and 34.50% (CI95%:31.12-38.97) in men and women, with significant rural versus urban difference in both sexes ( $p<0.001$ ).

**Tableau 3 : Prevalence of underweight, overweight and general obesity among study participants.**

|                           | n           | Underweight % (95% CI)       | Overweight % (95% CI)        | Obesity % (95% CI)        |
|---------------------------|-------------|------------------------------|------------------------------|---------------------------|
| <b>Gender</b>             |             |                              |                              |                           |
| Male                      | 2223        | 8.10 (6.71 - 97.3)           | 13.91 (11.88 -16.22)         | 3.29 (2.33 - 4.62)        |
| Female                    | 2249        | 15.05 (13.19 - 17.12)        | 13.74 (11.86 -15.86)         | 6.24 (5.11 - 7.60)        |
| <b>Age groups (years)</b> |             |                              |                              |                           |
| 25 - 34                   | 1977        | 9.32 (7.76 - 11.17)          | 12.09 (10.22 - 14.24)        | 3.73 (2.69 - 5.16)        |
| 35 - 44                   | 1133        | 10.77 (8.70 - 13.25)         | 16.12 (13.35 - 19.34)        | 5.64 (4.26 - 7.43)        |
| 45 - 54                   | 828         | 14.05 (11.63 - 16.89)        | 15.75 (12.79 -19.24)         | 5.26 (3.61 - 7.61)        |
| 55 - 64                   | 534         | 18.75 (15.04 - 23.13)        | 11.22 (8.36 - 14.90)         | 6.10 (3.97 - 9.24)        |
| <b>Residence</b>          |             |                              |                              |                           |
| Rural                     | 3479        | 13.32 (11.79 - 15.03)        | 9.74 (8.33 - 11.35)          | 1.89 (1.40 - 2.53)        |
| Urban                     | 993         | 7.67 (5.09 - 11.42)          | 24.46 (20.06 - 29.47)        | 12.54 (9.75- 15.99)       |
| <b>Total</b>              | <b>4472</b> | <b>11.76 (10.40 - 13.27)</b> | <b>13.82 (12.25 - 15.55)</b> | <b>4.84 (3.99 - 5.86)</b> |

### **Risk factors for Obesity and overweight**

#### **Among men.**

In multivariable analysis, significant predictors of overweight and obesity among men included place of residence, physical activity, age, marital status, alcohol, tobacco and fat consumption. Men living in urban areas were around 3 times proportionally more likely to be at least overweight as compared to those living in rural areas (APOR: 2.84, CI95%: 1.90 - 4.23). The odds of being overweight or obese was lower within the 25 to 34 age group as compared to 35-44 years and 45-54 years. Men aged 35 to 44 years were 1.4 times proportionally more likely to be overweight or obese (APOR: 1.4, CI<sub>95%</sub>: 1.00 – 1.90). Compared to single men, men living in unions and those that are widowed or divorced were having higher proportional odds of being overweight or obese (APOR: 1.62, CI<sub>95%</sub>: 1.09 - 2.42 and APOR: 1.83, CI<sub>95%</sub>: 0.76 - 4.39). The current consumption of tobacco reduces by nearly half the proportional odds (APOR: 0.53, CI<sub>95%</sub>: 0.37 - 0.74). No significant difference was found between former and second hand smokers and men who had never smoked. The report of the consumption of butter, lard or margarine as the most often type of fat was associated with more than 30% proportional odds reduction (APOR: 0.62, CI95%: 0.39 - 0.97). The practice of physical activity was also



1  
2  
3 associated with lower odds of overweight/obesity with the odds reduction increasing as the  
4 intensity of the physical activity increases (APOR: 0.68, CI<sub>95%</sub>:0.44-1.04 and APOR:0.62,  
5 CI<sub>95%</sub>:0.42-0.93).  
6  
7  
8  
9

### 10 **Among women**

11  
12  
13 Among women, significant risk factors included urban residence, current tobacco consumption,  
14 educational level, the type of occupation and fat consumption. Urban residential status was  
15 associated with around three-fold increase in the proportional odds of obesity or overweight  
16 (APOR 2.67, CI<sub>95%</sub>:1.89 - 3.78) as compared to rural residence. Being of primary school  
17 education level increased nearly two times the proportional odds of overweight or obesity  
18 (APOR: 1.80, CI<sub>95%</sub>:1.26-2.57) as compared to those that have not been at school (no  
19 education). The proportional odds of being at least overweight was lower among current  
20 tobacco smokers compared to non-smokers (APOR: 0.42, CI<sub>95%</sub>: 0.29 - 0.60). As compared to  
21 wage earners, women that are self-employed and those that house makers were less likely to be  
22 overweight/obese (APOR:0.45, CI<sub>95%</sub>:0.24-0.87 and APOR:0.40, CI<sub>95%</sub>:0.21-0.77). The report  
23 of butter/lard or margarine as type of fat often consumed was associated with lower odds of  
24 overweight/obesity (APOR:0.67, CI<sub>95%</sub>:0.46-0.99).  
25  
26  
27  
28  
29  
30  
31  
32  
33

34 The results of the multivariable analysis are presented in Table 4.  
35  
36  
37  
38  
39  
40  
41  
42  
43  
44  
45  
46  
47  
48  
49  
50  
51  
52  
53  
54  
55  
56  
57  
58  
59  
60

Table 4: Risk factors for overweight and obesity among male and female adult population aged 25–64

|                                | Male (n=2223)      |         |                   |         | Female (n=2249)   |         |                   |         |
|--------------------------------|--------------------|---------|-------------------|---------|-------------------|---------|-------------------|---------|
|                                | CPOR (95% CI)      | p-value | APOR (95% CI)     | p-value | CPOR (95% CI)     | p-value | APOR (95% CI)     | p-value |
| <b>Residence area</b>          |                    |         |                   |         |                   |         |                   |         |
| Rural                          | 1.00               |         | 1.00              |         | 1.00              |         | 1.00              |         |
| Urban                          | 3.97 (2.93 -5.38)  | 0.000   | 2.84 (1.90 -4.23) | 0.000   | 3.83 (3.72 -6.28) | 0.000   | 2.67 (1.89 -3.78) | 0.000   |
| <b>Age (years)</b>             |                    |         |                   |         |                   |         |                   |         |
| 25 – 34                        | 1.00               |         | 1.00              |         | 1.00              |         | 1.00              |         |
| 35 – 44                        | 1.96 (1.39 - 2.78) | 0.000   | 1.40 (1.00 -1.90) | 0.049   | 1.29 (0.97 -1.73) | 0.081   | 1.19 (0.89 -1.59) | 0.239   |
| 45 – 54                        | 1.74 (1.18 - 2.56) | 0.005   | 1.20 (0.81 -1.65) | 0.412   | 1.46 (1.04 -2.07) | 0.030   | 1.18 (0.87 -1.61) | 0.287   |
| 55 – 64                        | 1.42 (0.90 - 2.25) | 0.133   | 0.67 (0.43 -1.04) | 0.074   | 1.40 (0.87 -2.26) | 0.168   | 1.12 (0.70 -1.80) | 0.628   |
| <b>Education</b>               |                    |         |                   |         |                   |         |                   |         |
| None                           | 1.00               |         | 1.00              |         | 1.00              |         | 1.00              |         |
| Primary                        | 1.22 (0.82 -1.80)  | 0.320   | 1.07(0.75 -1.53)  | 0.708   | 2.92 (2.09 -4.09) | 0.000   | 1.80 (1.26 -2.57) | 0.001   |
| Secondary<br>(school) and over | 3.24 (2.12 -4.95)  | 0.000   | 1.39 (0.77 -2.48) | 0.271   | 4.07 (2.56 -6.46) | 0.000   | 1.57 (0.87 -2.80) | 0.131   |
| <b>Occupation</b>              |                    |         |                   |         |                   |         |                   |         |
| Wage earners                   | 1.00               |         | 1.00              |         | 1.00              |         | 1.00              |         |
| Self-employed                  | 0.28 (0.19 -0.43)  | 0.000   | 0.98 (0.53 -1.81) | 0.959   | 0.21 (0.12 -0.36) | 0.000   | 0.45 (0.24 -0.87) | 0.017   |

|                            |                   |       |                   |       |                   |       |                   |       |
|----------------------------|-------------------|-------|-------------------|-------|-------------------|-------|-------------------|-------|
| Unemployed                 | 0.51 (0.25 -1.02) | 0.057 | 0.75 (0.35 -1.60) | 0.458 | 0.57 (0.22 -1.45) | 0.236 | 0.42 (0.14 -1.27) | 0.123 |
| House maker                |                   |       |                   |       | 0.27 (0.16 -0.47) | 0.000 | 0.40 (0.21 -0.77) | 0.006 |
| <b>Marital status</b>      |                   |       |                   |       |                   |       |                   |       |
| Single                     | 1.00              |       | 1.00              |       | 1.00              |       | 1.00              |       |
| Cohabiting/Married         | 1.30 (0.81 -2.07) | 0.271 | 1.62 (1.09 -2.42) | 0.017 | 0.66 (0.31 -1.43) | 0.297 | (1.01 -4.16)      | 0.045 |
| Divorced/Widowed/<br>ed/   | 2.13 (0.96 -4.73) | 0.063 | 1.83 (0.76 -4.39) | 0.176 | 0.72 (0.31 -1.70) | 0.459 | 1.64 (0.73 -3.68) | 0.232 |
| <b>Tobacco consumption</b> |                   |       |                   |       |                   |       |                   |       |
| Never                      | 1.00              |       | 1.00              |       | 1.00              |       | 1.00              |       |
| Current smoker             | 0.64 (0.43 -0.95) | 0.027 | 0.53 (0.37 -0.74) | 0.000 | 0.20 (0.10 -0.37) | 0.000 | 0.42 (0.29 -0.60) | 0.000 |
| Former smoker              | 1.44 (0.77 -2.71) | 0.257 | 1.10 (0.59 -2.05) | 0.756 | 0.98 (0.18 -5.21) | 0.983 | 0.55 (0.13 -2.37) | 0.426 |
| Second hand smoking        | 1.27 (0.92 -1.75) | 0.151 | 1.11 (0.82 -1.50) | 0.506 | 1.30 (0.99 -1.71) | 0.056 | 1.14 (0.87 -1.48) | 0.347 |
| <b>Alcohol</b>             |                   |       |                   |       |                   |       |                   |       |
| None                       | 1.00              |       | 1.00              |       | 1.00              |       | 1.00              |       |
| Low                        | 1.04 (0.71 -1.51) | 0.856 | 0.96 (0.68 -1.35) | 0.811 | 0.47 (0.26 -0.85) | 0.012 | 0.69 (0.45 -1.05) | 0.081 |
| Medium                     | 1.69 (1.00 -2.82) | 0.047 | 1.87 (1.20 -2.93) | 0.006 | 1.44 (1.00 -2.07) | 0.047 | 1.17 (0.82 -1.68) | 0.386 |
| High                       | 1.52 (0.74 -3.13) | 0.257 | 1.38 (0.77 -2.46) | 0.276 | 1.21 (0.57 -2.59) | 0.620 | 0.71 (0.38 -1.32) | 0.280 |
| <b>Fat used</b>            |                   |       |                   |       |                   |       |                   |       |

1  
2  
3  
4  
5  
6  
7  
8  
9  
10  
11  
12  
13  
14  
15  
16  
17  
18  
19  
20  
21  
22  
23  
24  
25  
26  
27  
28  
29  
30  
31  
32  
33  
34  
35  
36  
37  
38  
39  
40  
41  
42  
43  
44  
45  
46

| None                           | 1.00              |       | 1.00              |       | 1.00              |       | 1.00              |       |
|--------------------------------|-------------------|-------|-------------------|-------|-------------------|-------|-------------------|-------|
| Vegetable oil                  | 1.10 (0.71 -1.71) | 0.658 | 0.85 (0.56 -1.30) | 0.461 | 2.00 (1.27 -3.18) | 0.03  | 1.04 (0.72 -1.52) | 0.829 |
| Butter, lard or fat, margarine | 0.48 (0.28 -0.81) | 0.006 | 0.62 (0.39 -0.97) | 0.037 | 0.73 (0.44 -1.23) | 0.240 | 0.67 (0.46 -0.99) | 0.045 |
| <b>Physical activity</b>       |                   |       |                   |       |                   |       |                   |       |
| Low intensity                  | 1.00              |       | 1.00              |       | 1.00              |       | 1.00              |       |
| Moderate intensity             | 0.58 (0.38 -0.90) | 0.016 | 0.68 (0.44 -1.04) | 0.076 | 0.76 (0.53 -1.10) | 0.147 | 0.94 (0.66 -1.33) | 0.581 |
| High intensity                 | 0.44 (0.30 -0.65) | 0.000 | 0.62 (0.42 -0.93) | 0.021 | 0.55 (0.39 -0.76) | 0.000 | 0.88 (0.63 -1.23) | 0.449 |

*CPOR : Crude proportional odds ratio ; APOR : Adjusted proportional odds ratio ; CI : Confidence interval*

## Discussion

### *Prevalence of overweight and obesity*

The overall prevalence of overweight was relatively high in our study, with no significant difference between men and women. Studies in Africa have also found similar prevalence among both sex[22,31]. However, some authors reported higher proportion of overweight among men[32–34]. The prevalence of obesity in our study was around 5% with disparities found across regions.

The prevalence of obesity was higher among women. Several other studies also reported higher prevalence of obesity among women[9,10,35,36]. Hormonal effects, especially among older ages, women's maternity and lifestyle, and certain cultural conceptions, may be contributing to this higher burden of obesity among women[37].

### *Factors associated with obesity*

Living in urban areas and current tobacco consumption are factors associated with obesity or overweight among both genders. Van Der and all in Gambia[9], also noted that risk in urban areas was about 3 times higher than in rural areas (OR: 2.86, 95% CI: 1.89 - 4 , 35). Abubakari et al. in a meta-analysis of studies conducted in sub-Saharan Africa[11] also noted that the risk was higher in urban areas (OR: 2.70, 95% CI, 1.76-4.15). This high risk could be explained by more sedentary lifestyle in urban areas as previously mentioned. In addition, in urban areas, eating patterns are different from that of rural areaq with more sugar and fats rich food known as "urban" or "western" foods[8]. Current tobacco consumption was inversely associated with the occurrence of overweight or obesity within both genders. Results from other studies reported that smoking for a long period tends to lead to weight loss. Similarly, cessation of tobacco consumption goes along with weight gain[38,39]. However, because smoking is an exposure with well-known detrimental consequences on health, the observed association between smoking and overweight/obesity shouldn't be interpreted as being in favor of smoking as a strategy to prevent obesity/overweight.

Other factors associated with overweight or obesity among men were age, marital status, consumption of butter /lard / margarine, and physical activity. Several authors also reported a positive association between the risk of obesity and age [12,15,33]. Aging leads to less physical activity and combined with greater socio-economic status, increase the ability to access diverse foods. The use of butter / fat / margarine as the main source of lipid was inversely associated with obesity in our data. This is an unexpected result as one would expect a lower risk of

1  
2  
3 overweight and obesity among those that use predominantly vegetable oil. The lack of  
4 quantification of the consumption of the different types of oil makes difficult the comparison.  
5  
6 Physical activity was associated with significant decrease in the odds of obesity only in men  
7 and not in women in our data. Other studies carried out by Pasquet et al. in Cameroon[14] and  
8 Oladimeji in Nigeria[16] revealed that the practice of intensive physical activity reduces  
9 significantly the risk of obesity.  
10  
11

12  
13  
14 Indeed, the intensive physical activity leads to an increase in the energy expenditure, avoids fat  
15 deposition and promotes a development of the muscular mass [40]. Men living in union were  
16 about 60% more likely to be obese compared to single men. There was an association in the  
17 same direction in women. There is a correlation between marital status and socio-economic  
18 position. In our study, we lack data on the socio-economic status and we used education status  
19 as a proxy. Our findings of a positive correlation between being married and overweight/obesity  
20 may have been confounded by the socio-economic status.  
21  
22

23  
24 Among women, education was associated with obesity/overweight. However, in their study  
25 among women living in urban areas, Benkeser et al. in Ghana [37] did not find a relation  
26 between educational level and obesity. This could be explained by the fact that their study was  
27 exclusively carried out in urban areas where the heterogeneity between educational statuses  
28 may be lesser. We found difference in predictors of overweight/obesity between men and  
29 women. Physical activity and age were significant predictors in men and not in women, while  
30 the education status and the type of employment were significant predictors in only women.  
31 These results are in favor of gender specific predictors for overweight/obesity and are in support  
32 of gender-based stratified analyses.  
33  
34  
35  
36  
37  
38  
39  
40  
41  
42

### 43 ***Limitations of the study***

44  
45 The results reported in this study are derived from a cross sectional study limiting our ability to  
46 derive causal inferences from the observed associations. Exposures measurements were mainly  
47 based on a short window recall as it is usual in this type of studies, hampering the possibility to  
48 get further attributes (quantity, duration etc.) on some exposures such as fat and fruit  
49 consumptions, that would have been invaluable in the interpretation of the results. We did not  
50 have information on socio-economic status that is a known key variable when trying to predict  
51 overnutrition. Furthermore, the analysis carried out and our interpretation of the results assume  
52 that an overweight person is in transition to obese status. While this is conceptually true, we  
53  
54  
55  
56  
57  
58  
59  
60

1  
2  
3 cannot rule out that an overweight person will turn to be normal in the future, particularly in a  
4 setting where food insecurity is common.  
5  
6

## 7 **Conclusion**

8  
9 Our study showed an important burden of obesity and overweight in the adult population with  
10 women more affected than men. Overnutrition needs to be recognized as an important public  
11 health issue. The country is witnessing the double burden of malnutrition with the coexistence  
12 of overnutrition and undernutrition. Nutrition interventions need to be reshaped to account for  
13 this epidemiological picture of malnutrition in Burkina Faso.  
14  
15  
16  
17  
18  
19  
20

## 21 **Abbreviations**

22  
23 BMI: body mass index; CI: confidence interval; CPOR : Crude proportional odds ratio ;  
24 APOR : Adjusted proportional odds ratio ; WHO : World health organization.  
25  
26  
27

## 28 **Acknowledgements**

29  
30 This research was carried out by SK as partial fulfilment of his master program in public health  
31 at the African Institute of Public Health. SK was granted funds by the Ministry of Health of  
32 Burkina Faso for his master's program.  
33  
34  
35

36 The authors are grateful to the Ministry of Health for giving access to the data. We would also  
37 like to thank the African Institute of Public Health for the logistic support to the drafting of the  
38 article.  
39  
40  
41

## 42 **Funding**

43  
44 This work is a secondary analysis of data from the STEPS survey. Authors didn't receive  
45 funding for this work.  
46  
47

## 48 **Data sharing and availability**

49  
50 The STEPS 2013 survey database was used for this study. The dataset can be obtained at the  
51 Ministry of Health upon reasonable request. Any request for further analysis can be submitted  
52 to Dr Brice W. Bicaba [bicaba\\_brico@yahoo.fr](mailto:bicaba_brico@yahoo.fr)  
53  
54  
55

56 No further additional data is available.  
57  
58  
59  
60

### Authors contribution

SK1, MT and SK2 designed the study and SK1 drafted the paper. SK1 and MT performed initial analysis and MT reanalysed the data. SK2, BB, JS and HL made substantial contributions to the interpretation of the data. All authors read and approved the final manuscript.

### Conflicts of interest

None declared

### Consent for publication

Not applicable.

### Ethical considerations

The STEPS survey got approval from the Ethics Committee for Health Research (Deliberation No. 2012-12-092 of 05 December 2012). Written informed consent was obtained before inclusion in the study. For this study, we obtained an authorization from the General directorate of Health to reanalyze the data and the confidentiality of study participants was preserved.

### Figure legend

Figure 1: Diagram flow of the study participants. This figure shows the criteria that were used to select the study participants in our study and the numbers that were affected by these criteria and the final sample size of the study.



## References

1. Organisation mondiale de la Santé. OMS | Obésité [Internet]. WHO. World Health Organization; [cité 3 août 2020]. Disponible sur: <https://www.who.int/topics/obesity/fr/>
2. World Health Organization. Obesity: Preventing and managing the global epidemic. Geneva: World Health Organization; 2000.
3. DELPEUCH E, MAIRE B. Obésité et développement des pays du sud. *Med Trop.* 1997;57(4):380-8.
4. Ashkan A, Mohammad F, Marissa R, Patrick S, Kara E, Alex L, et al. Health Effects of Overweight and Obesity in 195 Countries over 25 Years. *N Engl J Med.* 6 juill 2017;377(1):13-27.
5. OMS | Obésité et surpoids [Internet]. WHO. Disponible sur: <http://www.who.int/>
6. Ali H M, Charbel El B, Ashkan A, Raghid C, Ibrahim K, Maziar M-L, et al. Burden of obesity in the Eastern Mediterranean Region: findings from the Global Burden of Disease 2015 study. *Int J Public Health.* 2018;63(Suppl 1):165-76.
7. Melaku YA, Gill TK, Taylor AW, Appleton SL, Gonzalez-Chica D, Adams R, et al. Trends of mortality attributable to child and maternal undernutrition, overweight/obesity and dietary risk factors of non-communicable diseases in sub-Saharan Africa, 1990-2015: findings from the Global Burden of Disease Study 2015. *Public Health Nutr.* avr 2019;22(5):827-40.
8. Zeba ANZ. Transition nutritionnelle et double fardeau de la malnutrition chez des adultes de Ouagadougou au Burkina Faso (Afrique de l'Ouest) [PhD]. [Canada]: Université de Montreal; 2012.
9. Van der Sande MAB, Bailey R, Faal H, Banya WAS, Dolin P, Nyan OA, et al. Nationwide prevalence study of hypertension and related non-communicable diseases in The Gambia. *Trop Med Int Health.* nov 1997;2(11):1039-48.
10. Njelekela M, Ikeda K, Mtabaji J, Yamori Y. Obesity and other risk factors for cardiovascular diseases among Africans: results from CARDIAC study in Tanzania. *Int Congr Ser.* mai 2004;1262:372-5.
11. Abubakari AR, Lauder W, Agyemang C, Jones M, Kirk A, Bhopal RS. Prevalence and time trends in obesity among adult West African populations: a meta-analysis. *Obes Rev.* juill 2008;9(4):297-311.
12. Sagna Y. Obesity and Metabolic Syndrome in a Burkina Faso Urban Area: Prevalence, Associated Factors and Comorbidities. *J Nutr Disord Ther.* nov 2014;04(02).

13. Fezeu L. Association between socioeconomic status and adiposity in urban Cameroon. *Int J Epidemiol*. 4 juill 2005;35(1):105-11.
14. Pasquet P, Temgoua LS, Melaman-Sego F, Froment A, Rikong-Adié H. Prevalence of overweight and obesity for urban adults in Cameroon. *Ann Hum Biol*. janv 2003;30(5):551-62.
15. Maruf FA, Udoji NV. Prevalence and Socio-Demographic Determinants of Overweight and Obesity in a Nigerian Population. *J Epidemiol*. 2015;25(7):475-81.
16. Oladimeji AM, Fawole O, Nguku P, Nsubuga P. Prevalence and factors associated with hypertension and obesity among civil servants in Kaduna, Kaduna State, June 2012. *Pan Afr Med J*. 2014;18(Suppl 1).
17. Tene Marceline Y. Obesity, Central Obesity, Overweight and Diabetes: Women are the Most Affected in Burkina Faso. *J Womens Health Care*. 2014;03(03).
18. Pessinaba S, Yayehd K, Pio M, Baragou R, Afassinou Y, Tchérou T, et al. L'obésité en consultation cardiologique à Lomé: prévalence et facteurs de risque cardio-vasculaire associés-étude chez 1200 patients. *Pan Afr Med J*. 2013;12(1).
19. Mabilia-Babela J-R, Sabaye Alima J, Monabeka HG, Mbika Cardorelle A, Nkoua J-L, Moyon G. Profil épidémiologique et clinique de l'obésité de l'enfant à Brazzaville (Congo). *Cah Nutr Diététique*. nov 2011;46(5):259-62.
20. Koueta F, Dao L, Dao F, Djekompté S, Sawadogo J, Diarra Y, et al. Facteurs associés au surpoids et à l'obésité des élèves de Ouagadougou (Burkina Faso). *Santé*. 2011;21(4):5.
21. Kramoh KE, N'goran YNK, Aké-Traboulsi E, Boka BC, Harding DE, Koffi DBJ, et al. Prévalence de l'obésité en milieu scolaire en Côte d'Ivoire. *Ann Cardiol Angéiologie*. juin 2012;61(3):145-9.
22. Msyamboza KP, Kathyola D, Dzewela T. Anthropometric measurements and prevalence of underweight, overweight and obesity in adult Malawians: nationwide population based NCD STEPS survey. *Pan Afr Med J [Internet]*. 24 juill 2013 [cité 12 mars 2017];15. Disponible sur: <http://www.ncbi.nlm.nih.gov/pmc/articles/PMC3828071/>
23. Institut National de la démographie. Recensement général de la population et de l'habitation de 2006. Burkina Faso; 2008. 52 p.
24. Ministère de la Santé. Projections démographiques de 2011 à 2020 des régions et districts sanitaires du Burkina Faso.
25. Ministère de la santé. Annuaire statistique 2014. Burkina Faso; 2015 p. 330.
26. Ministère de la Santé. Rapport de l'enquête nutritionnelle nationale. Burkina Faso; 2019 p. 32.

- 1  
2  
3 27. Organisation mondiale de la Santé. Profils des pays pour les maladies non  
4 transmissibles (MNT), 2016.
- 5  
6 28. Kish L. A Procedure for Objective Respondent Selection within the  
7 Household. *J Am Stat Assoc.* sept 1949;44(247):380-7.
- 8  
9 29. Millogo T, Bicaba BW, Soubeiga JK, Dabiré E, Médah I, Kouanda S. Diabetes  
10 and abnormal glucose regulation in the adult population of Burkina Faso:  
11 prevalence and predictors. *BMC Public Health.* déc 2018;18(1):350.
- 12  
13 30. World Health Organization. Waist circumference and waist-hip ratio: report  
14 of a WHO expert consultation, Geneva, 8-11 December 2008. Geneva: World  
15 Health Organization; 2011.
- 16  
17 31. Adebayo RA, Balogun MO, Adedoyin RA, Obashoro-John OA, Bisiriyu LA,  
18 Abiodun OO. Prevalence and pattern of overweight and obesity in three rural  
19 communities in southwest Nigeria. *Diabetes Metab Syndr Obes Targets Ther.* 10  
20 mai 2014;7:153-8.
- 21  
22 32. Kamadjeu RM, Edwards R, Atanga JS, Kiawi EC, Unwin N, Mbanya J-C.  
23 Anthropometry measures and prevalence of obesity in the urban adult  
24 population of Cameroon: an update from the Cameroon Burden of Diabetes  
25 Baseline Survey. *BMC Public Health.* 2006;6(1):228.
- 26  
27 33. Kirunda BE, Fadnes LT, Wamani H, Van den Broeck J, Tylleskär T.  
28 Population-based survey of overweight and obesity and the associated factors in  
29 peri-urban and rural Eastern Uganda. *BMC Public Health.* 2015;15(1):1168.
- 30  
31 34. Gomes A, Damasceno A, Azevedo A, Prista A, Silva-Matos C, Saranga S, et al.  
32 Body mass index and waist circumference in Mozambique: urban/rural gap  
33 during epidemiological transition. *Obes Rev Off J Int Assoc Study Obes.* sept  
34 2010;11(9):627-34.
- 35  
36 35. Saeed KMI. Prevalence and associated risk factors for obesity in Jalalabad  
37 city - Afghanistan. *Alex J Med.* janv 2015;
- 38  
39 36. Cai L, He J, Song Y, Zhao K, Cui W. Association of obesity with socio-  
40 economic factors and obesity-related chronic diseases in rural southwest China.  
41 *Public Health.* mars 2013;127(3):247-51.
- 42  
43 37. Benkeser RM, Biritwum R, Hill AG. Prevalence of Overweight and Obesity and  
44 Perception of Healthy and Desirable Body Size in Urban, Ghanaian Women.  
45 *Ghana Med J.* juin 2012;46(2):66-75.
- 46  
47 38. Weg MWV, Klesges RC, DeBon M. Relationship Between Smokeless Tobacco  
48 Use and Body Weight in Young Adult Military Recruits. *Nicotine Tob Res.* 1 avr  
49 2005;7(2):301-5.
- 50  
51 39. Rodu B, Stegmayr B, Nasic S, Cole P, Asplund K. The influence of smoking  
52 and smokeless tobacco use on weight amongst men. *J Intern Med.* janv  
53 2004;255(1):102-7.
- 54  
55  
56  
57  
58  
59  
60

- 1  
2  
3 40. Tremblay A, Therrien F. Physical activity and body functionality:  
4 implications for obesity prevention and treatment. Can J Physiol Pharmacol.  
5 févr 2006;84(2):149-56.  
6  
7  
8  
9  
10  
11  
12  
13  
14  
15  
16  
17  
18  
19  
20  
21  
22  
23  
24  
25  
26  
27  
28  
29  
30  
31  
32  
33  
34  
35  
36  
37  
38  
39  
40  
41  
42  
43  
44  
45  
46  
47  
48  
49  
50  
51  
52  
53  
54  
55  
56  
57  
58  
59  
60

For peer review only

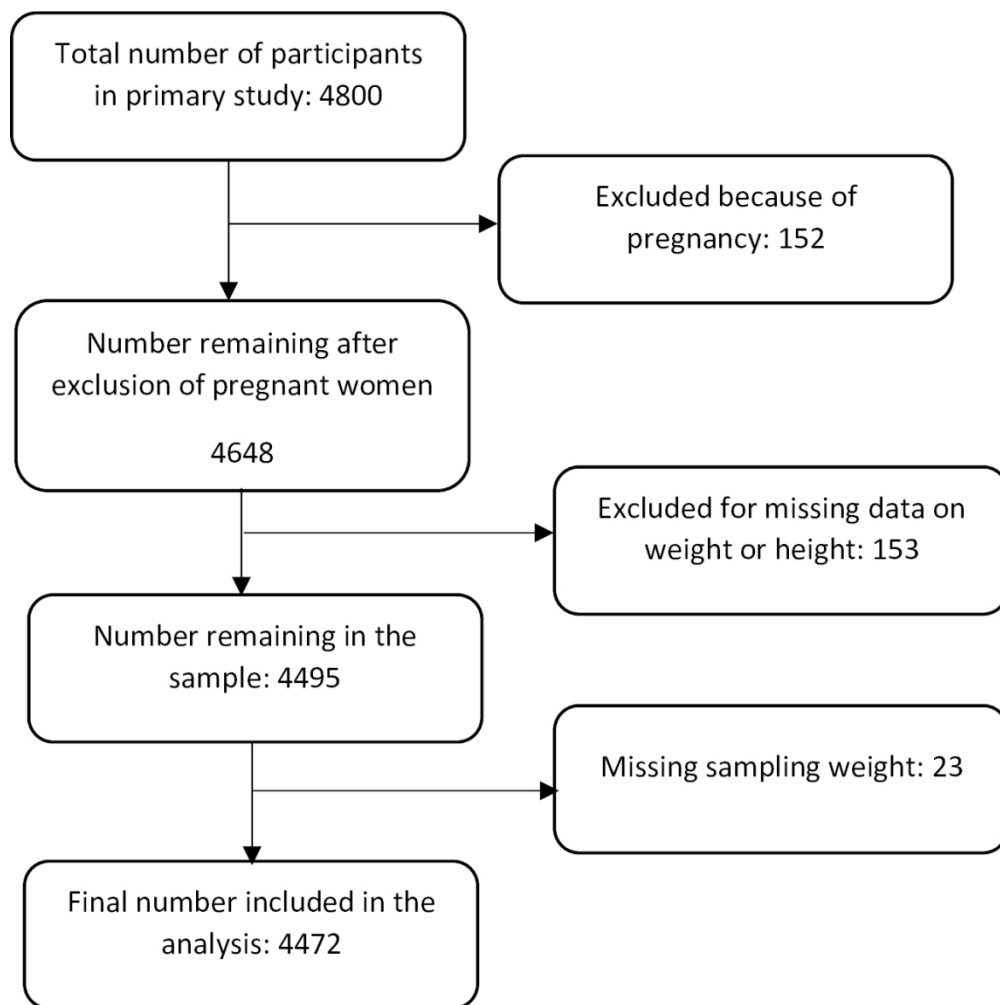

Figure 1 : Diagram flow of the study participants.

111x126mm (300 x 300 DPI)

STROBE Statement—Checklist of items that should be included in reports of *cross-sectional studies*

|                              | Item No | Recommendation                                                                                                                                                                                    | Page No     |
|------------------------------|---------|---------------------------------------------------------------------------------------------------------------------------------------------------------------------------------------------------|-------------|
| <b>Title and abstract</b>    | 1       | (a) Indicate the study's design with a commonly used term in the title or the abstract                                                                                                            | 1           |
|                              |         | (b) Provide in the abstract an informative and balanced summary of what was done and what was found                                                                                               | 2           |
| <b>Introduction</b>          |         |                                                                                                                                                                                                   |             |
| Background/rationale         | 2       | Explain the scientific background and rationale for the investigation being reported                                                                                                              | 4           |
| Objectives                   | 3       | State specific objectives, including any prespecified hypotheses                                                                                                                                  | 2&4         |
| <b>Methods</b>               |         |                                                                                                                                                                                                   |             |
| Study design                 | 4       | Present key elements of study design early in the paper                                                                                                                                           | 5           |
| Setting                      | 5       | Describe the setting, locations, and relevant dates, including periods of recruitment, exposure, follow-up, and data collection                                                                   | 5           |
| Participants                 | 6       | (a) Give the eligibility criteria, and the sources and methods of selection of participants                                                                                                       | 5&6         |
| Variables                    | 7       | Clearly define all outcomes, exposures, predictors, potential confounders, and effect modifiers. Give diagnostic criteria, if applicable                                                          | 7&8         |
| Data sources/<br>measurement | 8*      | For each variable of interest, give sources of data and details of methods of assessment (measurement). Describe comparability of assessment methods if there is more than one group              | 8           |
| Bias                         | 9       | Describe any efforts to address potential sources of bias                                                                                                                                         | 7&8         |
| Study size                   | 10      | Explain how the study size was arrived at                                                                                                                                                         | 6           |
| Quantitative variables       | 11      | Explain how quantitative variables were handled in the analyses. If applicable, describe which groupings were chosen and why                                                                      | 8           |
| Statistical methods          | 12      | (a) Describe all statistical methods, including those used to control for confounding                                                                                                             | 9           |
|                              |         | (b) Describe any methods used to examine subgroups and interactions                                                                                                                               | 9           |
|                              |         | (c) Explain how missing data were addressed                                                                                                                                                       | 9           |
|                              |         | (d) If applicable, describe analytical methods taking account of sampling strategy                                                                                                                | 9           |
|                              |         | (e) Describe any sensitivity analyses                                                                                                                                                             | None        |
| <b>Results</b>               |         |                                                                                                                                                                                                   |             |
| Participants                 | 13*     | (a) Report numbers of individuals at each stage of study—eg numbers potentially eligible, examined for eligibility, confirmed eligible, included in the study, completing follow-up, and analysed | 7& figure 1 |
|                              |         | (b) Give reasons for non-participation at each stage                                                                                                                                              | 7& figure 1 |
|                              |         | (c) Consider use of a flow diagram                                                                                                                                                                | Figure 1    |
| Descriptive data             | 14*     | (a) Give characteristics of study participants (eg demographic, clinical, social) and information on exposures and potential confounders                                                          | 9&10        |
|                              |         | (b) Indicate number of participants with missing data for each variable of interest                                                                                                               | 10          |

|                          |     |                                                                                                                                                                                                              |               |
|--------------------------|-----|--------------------------------------------------------------------------------------------------------------------------------------------------------------------------------------------------------------|---------------|
| Outcome data             | 15* | Report numbers of outcome events or summary measures                                                                                                                                                         | 10&11         |
| Main results             | 16  | (a) Give unadjusted estimates and, if applicable, confounder-adjusted estimates and their precision (eg, 95% confidence interval). Make clear which confounders were adjusted for and why they were included | 11&12&13&14   |
|                          |     | (b) Report category boundaries when continuous variables were categorized                                                                                                                                    | 10            |
|                          |     | (c) If relevant, consider translating estimates of relative risk into absolute risk for a meaningful time period                                                                                             | None included |
| Other analyses           | 17  | Report other analyses done—eg analyses of subgroups and interactions, and sensitivity analyses                                                                                                               | 11-15         |
| <b>Discussion</b>        |     |                                                                                                                                                                                                              |               |
| Key results              | 18  | Summarise key results with reference to study objectives                                                                                                                                                     | 16            |
| Limitations              | 19  | Discuss limitations of the study, taking into account sources of potential bias or imprecision. Discuss both direction and magnitude of any potential bias                                                   | 3&16          |
| Interpretation           | 20  | Give a cautious overall interpretation of results considering objectives, limitations, multiplicity of analyses, results from similar studies, and other relevant evidence                                   | 16            |
| Generalisability         | 21  | Discuss the generalisability (external validity) of the study results                                                                                                                                        | 16&17         |
| <b>Other information</b> |     |                                                                                                                                                                                                              |               |
| Funding                  | 22  | Give the source of funding and the role of the funders for the present study and, if applicable, for the original study on which the present article is based                                                | 18            |

\*Give information separately for exposed and unexposed groups.

**Note:** An Explanation and Elaboration article discusses each checklist item and gives methodological background and published examples of transparent reporting. The STROBE checklist is best used in conjunction with this article (freely available on the Web sites of PLoS Medicine at <http://www.plosmedicine.org/>, Annals of Internal Medicine at <http://www.annals.org/>, and Epidemiology at <http://www.epidem.com/>). Information on the STROBE Initiative is available at [www.strobe-statement.org](http://www.strobe-statement.org).

# BMJ Open

## Prevalence and risk factors for Overweight and obesity: a cross sectional countrywide study in Burkina Faso

|                                 |                                                                                                                                                                                                                                                                                                                                                                                                                                                                                                                                                                                    |
|---------------------------------|------------------------------------------------------------------------------------------------------------------------------------------------------------------------------------------------------------------------------------------------------------------------------------------------------------------------------------------------------------------------------------------------------------------------------------------------------------------------------------------------------------------------------------------------------------------------------------|
| Journal:                        | <i>BMJ Open</i>                                                                                                                                                                                                                                                                                                                                                                                                                                                                                                                                                                    |
| Manuscript ID                   | bmjopen-2019-032953.R3                                                                                                                                                                                                                                                                                                                                                                                                                                                                                                                                                             |
| Article Type:                   | Original research                                                                                                                                                                                                                                                                                                                                                                                                                                                                                                                                                                  |
| Date Submitted by the Author:   | 21-Sep-2020                                                                                                                                                                                                                                                                                                                                                                                                                                                                                                                                                                        |
| Complete List of Authors:       | Kaboré, Seydou; African Institute of Public Health; Ministry of Health Burkina Faso,<br>Millogo, Tieba; African Institute of Public Health; Institut de Recherche en Sciences de la Sante<br>Soubeiga, Joseph; African Institute of Public Health; Ministry of Health Burkina Faso<br>Lanou, Hermann; Institut de Recherche en Sciences de la Sante; African Institute of Public Health<br>Bicaba, Brice; African Institute of Public Health; Ministry of Health Burkina Faso<br>Kouanda, Seni; Institut de Recherche en Sciences de la Santé; African Institute of Public Health, |
| <b>Primary Subject Heading</b>: | Epidemiology                                                                                                                                                                                                                                                                                                                                                                                                                                                                                                                                                                       |
| Secondary Subject Heading:      | Nutrition and metabolism                                                                                                                                                                                                                                                                                                                                                                                                                                                                                                                                                           |
| Keywords:                       | nutritionnal epidemiology, EPIDEMIOLOGY, NUTRITION & DIETETICS                                                                                                                                                                                                                                                                                                                                                                                                                                                                                                                     |
|                                 |                                                                                                                                                                                                                                                                                                                                                                                                                                                                                                                                                                                    |

SCHOLARONE™  
Manuscripts





I, the Submitting Author has the right to grant and does grant on behalf of all authors of the Work (as defined in the below author licence), an exclusive licence and/or a non-exclusive licence for contributions from authors who are: i) UK Crown employees; ii) where BMJ has agreed a CC-BY licence shall apply, and/or iii) in accordance with the terms applicable for US Federal Government officers or employees acting as part of their official duties; on a worldwide, perpetual, irrevocable, royalty-free basis to BMJ Publishing Group Ltd ("BMJ") its licensees and where the relevant Journal is co-owned by BMJ to the co-owners of the Journal, to publish the Work in this journal and any other BMJ products and to exploit all rights, as set out in our [licence](#).

The Submitting Author accepts and understands that any supply made under these terms is made by BMJ to the Submitting Author unless you are acting as an employee on behalf of your employer or a postgraduate student of an affiliated institution which is paying any applicable article publishing charge ("APC") for Open Access articles. Where the Submitting Author wishes to make the Work available on an Open Access basis (and intends to pay the relevant APC), the terms of reuse of such Open Access shall be governed by a Creative Commons licence – details of these licences and which [Creative Commons](#) licence will apply to this Work are set out in our licence referred to above.

Other than as permitted in any relevant BMJ Author's Self Archiving Policies, I confirm this Work has not been accepted for publication elsewhere, is not being considered for publication elsewhere and does not duplicate material already published. I confirm all authors consent to publication of this Work and authorise the granting of this licence.

1  
2  
3 **Prevalence and risk factors for overweight and obesity: a cross sectional**  
4 **countrywide study in Burkina Faso.**  
5  
6  
7  
8  
9

10 **Authors**

11 1. Seydou Kaboré, PharmD, MPH

12 Institut Africain de santé publique & Ministère de la Santé, Ouagadougou, Burkina Faso  
13 [seydoupfarm@yahoo.fr](mailto:seydoupfarm@yahoo.fr)

14 2. Tieba Millogo, MD, MSc, PhD (c)

15 Institut Africain de santé publique & Institut de Recherche en Sciences de la Santé,  
16 Ouagadougou, Burkina Faso  
17 [millogorod@gmail.com](mailto:millogorod@gmail.com)

18 3. Joseph Kouesyandé Soubeiga, MD, MPH

19 Ministère de la Santé, Ouagadougou, Burkina Faso  
20 [ksoubeiga@yahoo.fr](mailto:ksoubeiga@yahoo.fr)

21 4. Hermann Lanou, MD, MSc, PhD (c)

22 Institut Africain de santé publique & Institut de Recherche en Sciences de la Santé,  
23 Ouagadougou, Burkina Faso  
24 [hlanou@yahoo.ca](mailto:hlanou@yahoo.ca)

25 5. Brice W Bicaba , MD, MPH.

26 Ministry of Health, Burkina Faso  
27 [bicaba\\_brico@yahoo.fr](mailto:bicaba_brico@yahoo.fr)

28 6. Seni Kouanda, MD, MSc., PhD

29 Institut Africain de santé publique & Institut de Recherche en Sciences de la Santé,  
30 Ouagadougou, Burkina Faso  
31 [senikouanda@gmail.com](mailto:senikouanda@gmail.com)

32 **Corresponding Author**

33 Seni Kouanda

34 [skouanda@irss.bf](mailto:skouanda@irss.bf)

35 Institut Africain de santé publique, Deputy Director

36 PBox: 12 BP 199 Ouagadougou

37 Tel: (+226) 70261462  
38  
39  
40  
41  
42  
43  
44  
45  
46  
47  
48  
49  
50  
51  
52  
53  
54  
55  
56  
57  
58  
59  
60

1  
2  
3 **Word count:** 2929  
4

5 **Keywords:** Obesity, epidemiology of non-communicable disease, low-middle-income  
6 countries  
7

8  
9 **Abstract**  
10

11 **Objective:** The objective of this study was to determine the prevalence and predictors of  
12 overweight and obesity in Burkina Faso using a population-based country-wide sample. We  
13 hypothesize that there is a significant burden related to overweight/obesity in Burkina Faso.  
14  
15

16  
17 **Design:** Secondary analysis of a population-based country wide cross-sectional study  
18

19  
20 **Setting:** Burkina Faso, all the 13 regions including both rural and urban residential areas  
21

22  
23 **Participants:** 4,800 participants of both sexes, aged between 25 and 64 years.  
24

25  
26 **Main outcomes:** overweight and obesity using body mass index cut-off levels of WHO  
27

28  
29 **Results:** The prevalence of overweight and obesity in Burkina Faso were 13.82% (CI95%:  
30 12.25 - 15.55) and 4.84% (CI95%:3.99 - 5.86) respectively. Among men, the proportional odds  
31 of overweight / obesity increase with urban residency ( $p<0.001$ ), greater age ( $p<0.002$ ), marital  
32 status different from single ( $p\leq 0.007$ ) and decrease with current smoking ( $p=0.009$ ). Among  
33 women, the proportional odds of overweight / obesity increase with urban residency ( $p<0.001$ ),  
34 primary educational level ( $p=0.01$ ), high total blood cholesterol level ( $p<0.001$ ), high fasting  
35 blood glucose level ( $p=0.02$ ), and decrease with current smoking ( $p<0.001$ ).  
36  
37  
38

39  
40 **Conclusion:**  
41

42  
43 Our study showed that nearly one person out of five in the adult population of Burkina has an  
44 abnormal weight status with women being more affected than men. Urban residency is a  
45 consistent risk factor in both men and women. Alcohol consumption and education were  
46 associated with an increased odds in only women. Overnutrition needs to be recognized as an  
47 important public health issue in Burkina Faso and nutrition interventions need to be reshaped  
48 to account for it.  
49  
50  
51  
52  
53  
54  
55  
56  
57  
58  
59  
60

## Strengths and limitations

### *Strengths*

- To our best knowledge, this is the first nationwide study on obesity and overweight in Burkina Faso with a country level representative sample.
- Outcomes measurements were carried out following international standards through the WHO STEPwise approach to NCDs measurement and prevention.

### *Limitations*

- This is a cross sectional study, which hampers our ability to derive causal inferences from the reported data;
- The Socio-economic status, a known relevant variable was not measured in the primary study;
- Being overweight may not necessarily equate to being an obese person to be, particularly in a setting where food insecurity is common.

## Introduction

Obesity is defined as an abnormal or excessive accumulation of body fat, due to an energy imbalance between intake and expenditure [1]. It is a major risk factor for many non-communicable diseases (NCD) and a real public health threat in the world[2,3]. In 2015, high BMI contributed to 4.0 million deaths, which represented 7.1% of the deaths from all causes [4].

Obesity, a well-known phenomenon in developed countries, is increasingly common in low-middle income countries, affecting both children and adults [2,4,5]. In the Eastern Mediterranean Region, the prevalence of obesity increased in adults from 15.1% in 1980 to 20.7% in 2015. It increased from 4.1% to 4.9% in the same period among children [6]. In sub-Saharan Africa (SSA), Overweight/obesity factors accounted for 266 768 deaths, representing 3.3% of all-cause mortality [7]. Thus, in low- and middle-income countries, the association of overweight / obesity with one or more nutritional deficiencies is often observed, especially among women and known as double burden of malnutrition [8]. However, data from the literature reports that excess weight can largely be avoided; and prevention involves the identification and control of modifiable risk factors[2,5]. These factors have been widely described in the literature. There are mainly related to behavior and / or knowledge (inadequate diet, inactivity, alcohol consumption,), sociodemographic factors (place of residence, socio-economic status), and clinical and metabolic factors (total cholesterol level, HDL, triglycerides) [5,9–11].

However, the factors vary between countries, depending on eating habits and socio-cultural practices [2] . This variability of factors suggests a relevance of country specific studies to identify context specific and relevant risk factors in order to better guide and align the policies and strategies aiming to address the raising burden of obesity.

The studies conducted so far on factors associated with overweight or obesity in low-middle income countries were often conducted in urban areas [[12–16], hospitals[17,18], secondary and high schools [19–21]. There are few nationally representative data on obesity in most sub-Saharan African countries[9,22]. This scarcity of nationally representative data on the burden and risk factors for overweight/obesity is an obstacle to engaging countries in the design and implementation of adequate public health interventions.

1  
2  
3 Our study intends to fill this gap by providing more complete data on the prevalence and the  
4 risk factors for overweight and obesity, through a secondary analysis of data from the STEPS  
5 survey carried out in Burkina Faso in 2013.  
6  
7

## 8 9 **Methods**

### 10 11 ***Study setting***

12  
13  
14 Our study was conducted in Burkina Faso, a landlocked Sahelian country in the heart of West  
15 Africa. The country is divided into 13 regions, 45 provinces and 351 municipalities. In 2013,  
16 the population was estimated at 21,478,529 inhabitants. The majority of the population lives in  
17 rural areas, with agriculture and livestock as main activities[23,24].  
18  
19

20  
21 In terms of health, the country is still facing endemic-epidemic diseases, especially malaria,  
22 measles, cerebro-spinal meningitis, acute respiratory infections, diarrheal diseases and HIV /  
23 AIDS infection[25]. The prevalence of acute malnutrition in children under five years was  
24 estimated at 8.1% in 2019[26].  
25  
26

27  
28 Mortality due to non-communicable diseases is increasing rapidly in the same time; it was  
29 estimated that 33% of all death cases were due to NCD in 2016[27].  
30  
31  
32

### 33 34 35 ***Type of study***

36 We carried out an analytical cross-sectional study consisting of a secondary analysis of the data  
37 from the 2013 STEPS survey in Burkina Faso.  
38  
39  
40

### 41 42 43 ***Study population***

44 The study population of the survey was composed of adults of 25 to 64-year-old who have been  
45 living in the national territory for at least six (6) months before the survey. Persons with an  
46 inability to answer questions (cognitive impairment) were excluded from the primary study.  
47 Pregnant women were excluded from our analysis.  
48  
49  
50

### 51 52 53 54 **Sampling**

55 The enumeration areas (EAs) from the 2006 General Population and Housing Census , updated  
56 in 2010 during the Demographic and Health Survey conducted in Burkina Faso (EDS-BF, 2010)  
57 were used as sampling frame. The STEPS survey was carried out on a nationally representative  
58  
59  
60

sample of 4800 households with 20 households per EAs, giving 240 EAs for the whole country. The sample was stratified in each of the 13 administrative regions to provide an adequate representation of the urban and rural areas. This stratification took into account the distribution of the population depending on the urban (22.7%) and rural environment (77.3%) in Burkina Faso, giving 54 EAs for urban area and 186 EAs for rural areas across the country. Within each stratum, a three-stage cluster sampling was done as recommended by WHO for STEPS NCD risk factors screening surveys.

At the first stage, the choice of clusters or enumeration zones by administrative regions was made by a systematic draw with proportional probability to the size of the EAs.

At the second stage, a household count in each of the selected 240 clusters at the first stage provided a list of households from which a sample of 20 households was selected using a simple systematic random sampling with an Excel Spread Sheet.

At the third level, the choice of individuals within households was made randomly. Once a household is selected, the interviewer creates a listing (sampling frame) of all eligible adults in the household. The listing includes the following variables: name, gender, relationship to the household head and age. Once the listing is created, each eligible member is assigned a unique number. Then using a randomized response table (Kish table), a particular member is chosen for the interview [28]. In each household, an individual of 25 to 64 years old living in the household was drawn to participate in the survey.

### ***Sample Size and power of the study***

The sample size was calculated by using the following formula:

$$n = \frac{\left( \frac{Z_{\alpha}^2 * P(1 - P)}{e^2} * 1.5 * 8 \right)}{0.8} = \frac{\left( \frac{1.96^2 * 0.296(1 - 0.296)}{0.05^2} * 1.5 * 8 \right)}{0.8} = 4800$$

where  $z_{\alpha} = 1.96$  for a type-I error  $\alpha$  of 0.05;  $e$  = absolute margin of error on the estimate of the proportion (0.05);  $P$ : expected hypertension prevalence (0.296). The sample size was adjusted to account for the design effect (1.5), the number of age group per gender (8) and the expected non response rate (20%).

The STEPS survey was conducted on a representative sample of 4,800 individuals. Out of the 4800 participants, 152 were excluded for pregnancy, 153 for missing data (on height and / or

weight) and 23 due to a lack of sampling weights. The sample that we analyzed finally included 4472 persons (See figure1 for study inclusion process). With this final sample size and assuming a prevalence of obesity of 4.5%, our study has a statistical power of 86.6% to detect an association of a magnitude of 1.5 with the type-I error rate  $\alpha$  of 5%.

### ***Data collection***

The collection of data was carried out by nurses, graduate medical and nurse students. The data collection consisted in face-to-face interviews of selected participants using standardized questionnaires and physical and biochemical measurements. The data collection tools were pre-tested before they were used at the national level.

Data collection teams were closely supervised by a team of supervisors composed of statisticians, epidemiologists and clinicians.

Height measurement (in cm) was made in a standing or lying position, using a portable measuring board, on the participant without shoes and hat. The weight in kg was measured using an electronic weighing scales (SECA™) placed on a stable and even surface, the person lightly dressed, shoes-off and in a standing position.

The total cholesterol and blood glucose levels were measured using a Cardiocheck™ PA SILVER kit that performs all these measurements using a capillary whole blood sample. Further details on the STEPS survey are available elsewhere[29].

### ***Patient and public involvement***

No patient involved in this research.

### ***Study Variables***

We used body mass index (BMI) to define general obesity. The BMI was calculated dividing the weight (kg) by the size (in meters) squared and then used to define undernutrition (BMI <18.5 kg / m<sup>2</sup>), normal (18.5 - 24.99 kg / m<sup>2</sup>), overweight (25.0-29.99 kg / m<sup>2</sup>) and obesity (30 kg / m<sup>2</sup>) in accordance with WHO recommendations [2]. We also used waist circumference to compute central obesity with the cut-off points of 94 cm in men and 80 cm in women[30].

Independent variables included age, marital status, place of residence, occupational activity, educational level, total cholesterol level, fasting blood glucose, smoking, alcohol consumption, the type of fat most commonly consumed and the intensity of physical activities. Some variables were recoded using specific cut-points of grouping (see Table 1).



Table 1 : Recoding of exposure variables

| Variables                 | Categories                                                                                                                                                                                                                                                                                                                                                                                                                                                                                                                                                                                                                                                                       |
|---------------------------|----------------------------------------------------------------------------------------------------------------------------------------------------------------------------------------------------------------------------------------------------------------------------------------------------------------------------------------------------------------------------------------------------------------------------------------------------------------------------------------------------------------------------------------------------------------------------------------------------------------------------------------------------------------------------------|
| Age groups (years)        | «25 to 34» «35 to 44» «45 to 54» «55 to 64»                                                                                                                                                                                                                                                                                                                                                                                                                                                                                                                                                                                                                                      |
| Education level           | «None» «Primary» «Secondary and higher»                                                                                                                                                                                                                                                                                                                                                                                                                                                                                                                                                                                                                                          |
| Marital status            | «Single» «Cohabiting/Married» «Divorced/widowed/ separated»                                                                                                                                                                                                                                                                                                                                                                                                                                                                                                                                                                                                                      |
| Occupational status       | «Employed» «self-employed» «Unemployed» «House makers »                                                                                                                                                                                                                                                                                                                                                                                                                                                                                                                                                                                                                          |
| Total cholesterol level   | Normal (<5.2 mmol/l); High cholesterol (≥5.2 mmol/l)                                                                                                                                                                                                                                                                                                                                                                                                                                                                                                                                                                                                                             |
| Fasting capillary glucose | Normal (<6.1 mmol/l); High glucose (≥6.1 mmol/l)                                                                                                                                                                                                                                                                                                                                                                                                                                                                                                                                                                                                                                 |
| Cigarette smoking         | « Never » «Current smoker » « Former smoker » « Second hand smoking »                                                                                                                                                                                                                                                                                                                                                                                                                                                                                                                                                                                                            |
| Daily alcohol consumption | <ul style="list-style-type: none"> <li>• Male : None (0 g) Low (0.01 – 39.99 g) Medium (40 - 59.99) High (60 and over)</li> <li>• Female : None (0 g) Low (0.01 – 19.99 g) Medium (20 - 39.99) High (40 and over)</li> </ul>                                                                                                                                                                                                                                                                                                                                                                                                                                                     |
| Fat intake                | «None» «Vegetable oil» « butter, lard or fat, margarine»                                                                                                                                                                                                                                                                                                                                                                                                                                                                                                                                                                                                                         |
| Physical activity         | <ul style="list-style-type: none"> <li>• High intensity activity: high intensity activities require an energy expenditure greater than 6 Metabolic equivalent of Task (METs). Examples include soccer playing, hole digging, regular swimming, farming etc.</li> <li>• Moderate intensity activity: moderate intensity activities require an energy expenditure of approximately 3–6 METs. Examples include cleaning, vacuuming, polishing, gardening, cycling at a regular pace or horse riding etc.</li> <li>• Low intensity activity: refers to persons who do not meet the above classifications. Here are included people with limited and no physical activity.</li> </ul> |

### ***Statistical analysis***

The predictive variables were selected based on the literature. We carried out stratified gender based analyzes. The Fisher Test was used to evaluate associations between the dependent variable and independent qualitative variables. We calculated crude proportional odds ratio (CPOR) and adjusted proportional odds ratios (APORs) using an ordinal logistic regression model. The dependant ordinal variable has four categories: underweight, normal, overweight and obese. The covariates selection in the multivariable analysis was based on epidemiological plausibility and literature review. All the analyses were weighted to account for the study design and we computed robust standard errors to account for the clustered nature of the data. The proportional risk assumption and the overall goodness of fit of the final models were checked before the results were reported. All the analyses were based on complete data analysis (missing data were ignored in all analyses). All analyzes were carried out using the Stata 13.1 software.

## Results

### *Background characteristics of the study sample*

The socio-demographic characteristics of the individuals of the sample are presented in Table 2. Participants of the 25-34 age group were majority with 40.92%. There were 2249 women, which represents 52.6% of the participants. Participants with no educational level accounted for 72.93% among men against 77.17% among women. The majority of the individuals were married/living in couple (86.96%).

Table 2 : Demographic and behavioural characteristics of study participants.

| Variables                     | Population   |              | Total        |
|-------------------------------|--------------|--------------|--------------|
|                               | Male n(%)    | Female n(%)  |              |
| <b>Residence</b>              |              |              |              |
| Urban                         | 454 (25.52)  | 539 (29.70)  | 993 (27.72)  |
| Rural                         | 1769 (74.48) | 1710 (70.30) | 3479 (72.28) |
| <b>Age groups</b>             |              |              |              |
| 25 - 34                       | 933 (38.09)  | 1044 (43.45) | 1977 (40.92) |
| 35 - 44                       | 560 (28.21)  | 573 (37.65)  | 1133 (27.91) |
| 45 - 54                       | 424 (20.22)  | 404 (18.49)  | 828 (19.31)  |
| 55 - 64                       | 306 (13.48)  | 228 (10.40)  | 534 (11.86)  |
| <b>Education level</b>        |              |              |              |
| None                          | 1623 (72.93) | 1832 (81.16) | 3455 (77.27) |
| Primary                       | 405 (17.85)  | 288 (13.07)  | 693 (15.33)  |
| Secondary (school) and higher | 187 (9.22)   | 129 (5.78)   | 316 (7.40)   |
| <b>Marital status</b>         |              |              |              |
| Single                        | 254 (11.04)  | 68 (3.24)    | 322 (6.93)   |
| Cohabiting/Married            | 1879 (85.74) | 1963 (88.06) | 3842 (86.96) |
| Divorced/Widowed/separated    | 87 (3.21)    | 216 (8.70)   | 303 (6.10)   |
| <b>Occupational status</b>    |              |              |              |
| Employed                      | 178 (6.68)   | 71 (3.44)    | 249 (2.92)   |
| Self-employed                 | 1945 (86.12) | 1188 (50.40) | 3133 (67.32) |
| Unemployed                    | 87 (4.51)    | 54 (2.44)    | 141 (3.42)   |
| Housemaker                    | 13 (0.70)    | 936 (43.72)  | 949 (23.34)  |

### *Prevalence of overweight and obesity*

As shown in Table 3, the prevalence of overweight and general obesity in the sample were respectively 13.82 (CI<sub>95%</sub>: 12.25 - 15.55) and 4.84 (CI<sub>95%</sub>: 3.99 - 5.86). The prevalence of general obesity was higher among women (p < 0.0001) and among urban residents (p < 0.0001). However, the proportion of overweight people did not significantly differ between women and men. Among all age groups, obesity was more prevalent in the age group 35 to 44 (p < 0.0001). The prevalence of obesity also varies across administrative regions (results not shown). The

prevalence of central obesity was respectively 6.33% (CI95%: 5.11-7.81) and 34.50% (CI95%:31.12-38.97) in men and women, with significant rural versus urban difference in both sexes ( $p<0.001$ ).

**Tableau 3 : Prevalence of underweight, overweight and general obesity among study participants.**

|                           | n           | Underweight % (95% CI)       | Overweight % (95% CI)        | Obesity % (95% CI)        |
|---------------------------|-------------|------------------------------|------------------------------|---------------------------|
| <b>Gender</b>             |             |                              |                              |                           |
| Male                      | 2223        | 8.10 (6.71 - 97.3)           | 13.91 (11.88 -16.22)         | 3.29 (2.33 - 4.62)        |
| Female                    | 2249        | 15.05 (13.19 - 17.12)        | 13.74 (11.86 -15.86)         | 6.24 (5.11 - 7.60)        |
| <b>Age groups (years)</b> |             |                              |                              |                           |
| 25 - 34                   | 1977        | 9.32 (7.76 - 11.17)          | 12.09 (10.22 - 14.24)        | 3.73 (2.69 - 5.16)        |
| 35 - 44                   | 1133        | 10.77 (8.70 - 13.25)         | 16.12 (13.35 - 19.34)        | 5.64 (4.26 - 7.43)        |
| 45 - 54                   | 828         | 14.05 (11.63 - 16.89)        | 15.75 (12.79 -19.24)         | 5.26 (3.61 - 7.61)        |
| 55 - 64                   | 534         | 18.75 (15.04 - 23.13)        | 11.22 (8.36 - 14.90)         | 6.10 (3.97 - 9.24)        |
| <b>Residence</b>          |             |                              |                              |                           |
| Rural                     | 3479        | 13.32 (11.79 - 15.03)        | 9.74 (8.33 - 11.35)          | 1.89 (1.40 - 2.53)        |
| Urban                     | 993         | 7.67 (5.09 - 11.42)          | 24.46 (20.06 - 29.47)        | 12.54 (9.75- 15.99)       |
| <b>Total</b>              | <b>4472</b> | <b>11.76 (10.40 - 13.27)</b> | <b>13.82 (12.25 - 15.55)</b> | <b>4.84 (3.99 - 5.86)</b> |

### **Risk factors for Obesity and overweight**

#### **Among men.**

In multivariable analysis, significant predictors of overweight and obesity among men included place of residence, physical activity, age, marital status, alcohol, tobacco and fat consumption. Men living in urban areas were around 3 times proportionally more likely to be at least overweight as compared to those living in rural areas (APOR: 2.84, CI95%: 1.90 - 4.23). The odds of being overweight or obese was lower within the 25 to 34 age group as compared to 35-44 years and 45-54 years. Men aged 35 to 44 years were 1.4 times proportionally more likely to be overweight or obese (APOR: 1.4, CI<sub>95%</sub>: 1.00 – 1.90). Compared to single men, men living in unions and those that are widowed or divorced were having higher proportional odds of being overweight or obese (APOR: 1.62, CI<sub>95%</sub>: 1.09 - 2.42 and APOR: 1.83, CI<sub>95%</sub>: 0.76 - 4.39). The current consumption of tobacco reduces by nearly half the proportional odds (APOR: 0.53, CI<sub>95%</sub>: 0.37 - 0.74). No significant difference was found between former and second hand smokers and men who had never smoked. The report of the consumption of butter, lard or margarine as the most often type of fat was associated with more than 30% proportional odds reduction (APOR: 0.62, CI95%: 0.39 - 0.97). The practice of physical activity was also

1  
2  
3 associated with lower odds of overweight/obesity with the odds reduction increasing as the  
4 intensity of the physical activity increases (APOR: 0.68, CI<sub>95%</sub>:0.44-1.04 and APOR:0.62,  
5 CI<sub>95%</sub>:0.42-0.93).

### 9 **Among women**

10  
11 Among women, significant risk factors included urban residence, current tobacco consumption,  
12 educational level, the type of occupation and fat consumption. Urban residential status was  
13 associated with around three-fold increase in the proportional odds of obesity or overweight  
14 (APOR 2.67, CI<sub>95%</sub>:1.89 - 3.78) as compared to rural residence. Being of primary school  
15 education level increased nearly two times the proportional odds of overweight or obesity  
16 (APOR: 1.80, CI<sub>95%</sub>:1.26-2.57) as compared to those that have not been at school (no  
17 education). The proportional odds of being at least overweight was lower among current  
18 tobacco smokers compared to non-smokers (APOR: 0.42, CI<sub>95%</sub>: 0.29 - 0.60). As compared to  
19 wage earners, women that are self-employed and those that house makers were less likely to be  
20 overweight/obese (APOR:0.45, CI<sub>95%</sub>:0.24-0.87 and APOR:0.40, CI<sub>95%</sub>:0.21-0.77). The report  
21 of butter/lard or margarine as type of fat often consumed was associated with lower odds of  
22 overweight/obesity (APOR:0.67, CI<sub>95%</sub>:0.46-0.99).

23  
24  
25  
26  
27  
28  
29  
30  
31  
32  
33 The results of the multivariable analysis are presented in Table 4.

Table 4: Risk factors for overweight and obesity among male and female adult population aged 25–64

|                                | Male (n=2223)      |         |                   |         | Female (n=2249)   |         |                   |         |
|--------------------------------|--------------------|---------|-------------------|---------|-------------------|---------|-------------------|---------|
|                                | CPOR (95% CI)      | p-value | APOR (95% CI)     | p-value | CPOR (95% CI)     | p-value | APOR (95% CI)     | p-value |
| <b>Residence area</b>          |                    |         |                   |         |                   |         |                   |         |
| Rural                          | 1.00               |         | 1.00              |         | 1.00              |         | 1.00              |         |
| Urban                          | 3.97 (2.93 -5.38)  | 0.000   | 2.84 (1.90 -4.23) | 0.000   | 3.83 (3.72 -6.28) | 0.000   | 2.67 (1.89 -3.78) | 0.000   |
| <b>Age (years)</b>             |                    |         |                   |         |                   |         |                   |         |
| 25 – 34                        | 1.00               |         | 1.00              |         | 1.00              |         | 1.00              |         |
| 35 – 44                        | 1.96 (1.39 - 2.78) | 0.000   | 1.40 (1.00 -1.90) | 0.049   | 1.29 (0.97 -1.73) | 0.081   | 1.19 (0.89 -1.59) | 0.239   |
| 45 – 54                        | 1.74 (1.18 - 2.56) | 0.005   | 1.20 (0.81 -1.65) | 0.412   | 1.46 (1.04 -2.07) | 0.030   | 1.18 (0.87 -1.61) | 0.287   |
| 55 – 64                        | 1.42 (0.90 - 2.25) | 0.133   | 0.67 (0.43 -1.04) | 0.074   | 1.40 (0.87 -2.26) | 0.168   | 1.12 (0.70 -1.80) | 0.628   |
| <b>Education</b>               |                    |         |                   |         |                   |         |                   |         |
| None                           | 1.00               |         | 1.00              |         | 1.00              |         | 1.00              |         |
| Primary                        | 1.22 (0.82 -1.80)  | 0.320   | 1.07(0.75 -1.53)  | 0.708   | 2.92 (2.09 -4.09) | 0.000   | 1.80 (1.26 -2.57) | 0.001   |
| Secondary<br>(school) and over | 3.24 (2.12 -4.95)  | 0.000   | 1.39 (0.77 -2.48) | 0.271   | 4.07 (2.56 -6.46) | 0.000   | 1.57 (0.87 -2.80) | 0.131   |
| <b>Occupation</b>              |                    |         |                   |         |                   |         |                   |         |
| Wage earners                   | 1.00               |         | 1.00              |         | 1.00              |         | 1.00              |         |
| Self-employed                  | 0.28 (0.19 -0.43)  | 0.000   | 0.98 (0.53 -1.81) | 0.959   | 0.21 (0.12 -0.36) | 0.000   | 0.45 (0.24 -0.87) | 0.017   |

|                            |                   |       |                   |       |                   |       |                   |       |
|----------------------------|-------------------|-------|-------------------|-------|-------------------|-------|-------------------|-------|
| Unemployed                 | 0.51 (0.25 -1.02) | 0.057 | 0.75 (0.35 -1.60) | 0.458 | 0.57 (0.22 -1.45) | 0.236 | 0.42 (0.14 -1.27) | 0.123 |
| House maker                |                   |       |                   |       | 0.27 (0.16 -0.47) | 0.000 | 0.40 (0.21 -0.77) | 0.006 |
| <b>Marital status</b>      |                   |       |                   |       |                   |       |                   |       |
| Single                     | 1.00              |       | 1.00              |       | 1.00              |       | 1.00              |       |
| Cohabiting/Married         | 1.30 (0.81 -2.07) | 0.271 | 1.62 (1.09 -2.42) | 0.017 | 0.66 (0.31 -1.43) | 0.297 | (1.01 -4.16)      | 0.045 |
| Divorced/Widowed/<br>ed/   | 2.13 (0.96 -4.73) | 0.063 | 1.83 (0.76 -4.39) | 0.176 | 0.72 (0.31 -1.70) | 0.459 | 1.64 (0.73 -3.68) | 0.232 |
| <b>Tobacco consumption</b> |                   |       |                   |       |                   |       |                   |       |
| Never                      | 1.00              |       | 1.00              |       | 1.00              |       | 1.00              |       |
| Current smoker             | 0.64 (0.43 -0.95) | 0.027 | 0.53 (0.37 -0.74) | 0.000 | 0.20 (0.10 -0.37) | 0.000 | 0.42 (0.29 -0.60) | 0.000 |
| Former smoker              | 1.44 (0.77 -2.71) | 0.257 | 1.10 (0.59 -2.05) | 0.756 | 0.98 (0.18 -5.21) | 0.983 | 0.55 (0.13 -2.37) | 0.426 |
| Second hand smoking        | 1.27 (0.92 -1.75) | 0.151 | 1.11 (0.82 -1.50) | 0.506 | 1.30 (0.99 -1.71) | 0.056 | 1.14 (0.87 -1.48) | 0.347 |
| <b>Alcohol</b>             |                   |       |                   |       |                   |       |                   |       |
| None                       | 1.00              |       | 1.00              |       | 1.00              |       | 1.00              |       |
| Low                        | 1.04 (0.71 -1.51) | 0.856 | 0.96 (0.68 -1.35) | 0.811 | 0.47 (0.26 -0.85) | 0.012 | 0.69 (0.45 -1.05) | 0.081 |
| Medium                     | 1.69 (1.00 -2.82) | 0.047 | 1.87 (1.20 -2.93) | 0.006 | 1.44 (1.00 -2.07) | 0.047 | 1.17 (0.82 -1.68) | 0.386 |
| High                       | 1.52 (0.74 -3.13) | 0.257 | 1.38 (0.77 -2.46) | 0.276 | 1.21 (0.57 -2.59) | 0.620 | 0.71 (0.38 -1.32) | 0.280 |
| <b>Fat used</b>            |                   |       |                   |       |                   |       |                   |       |

1  
2  
3  
4  
5  
6  
7  
8  
9  
10  
11  
12  
13  
14  
15  
16  
17  
18  
19  
20  
21  
22  
23  
24  
25  
26  
27  
28  
29  
30  
31  
32  
33  
34  
35  
36  
37  
38  
39  
40  
41  
42  
43  
44  
45  
46

| None                           | 1.00              |       | 1.00              |       | 1.00              |       | 1.00              |       |
|--------------------------------|-------------------|-------|-------------------|-------|-------------------|-------|-------------------|-------|
| Vegetable oil                  | 1.10 (0.71 -1.71) | 0.658 | 0.85 (0.56 -1.30) | 0.461 | 2.00 (1.27 -3.18) | 0.03  | 1.04 (0.72 -1.52) | 0.829 |
| Butter, lard or fat, margarine | 0.48 (0.28 -0.81) | 0.006 | 0.62 (0.39 -0.97) | 0.037 | 0.73 (0.44 -1.23) | 0.240 | 0.67 (0.46 -0.99) | 0.045 |
| <b>Physical activity</b>       |                   |       |                   |       |                   |       |                   |       |
| Low intensity                  | 1.00              |       | 1.00              |       | 1.00              |       | 1.00              |       |
| Moderate intensity             | 0.58 (0.38 -0.90) | 0.016 | 0.68 (0.44 -1.04) | 0.076 | 0.76 (0.53 -1.10) | 0.147 | 0.94 (0.66 -1.33) | 0.581 |
| High intensity                 | 0.44 (0.30 -0.65) | 0.000 | 0.62 (0.42 -0.93) | 0.021 | 0.55 (0.39 -0.76) | 0.000 | 0.88 (0.63 -1.23) | 0.449 |

*CPOR : Crude proportional odds ratio ; APOR : Adjusted proportional odds ratio ; CI : Confidence interval*

## Discussion

### *Prevalence of overweight and obesity*

The overall prevalence of overweight was relatively high in our study, with no significant difference between men and women. Studies in Africa have also found similar prevalence among both sex[22,31]. However, some authors reported higher proportion of overweight among men[32–34]. The prevalence of obesity in our study was around 5% with disparities found across regions.

The prevalence of obesity was higher among women. Several other studies also reported higher prevalence of obesity among women[9,10,35,36]. Hormonal effects, especially among older ages, women's maternity and lifestyle, and certain cultural conceptions, may be contributing to this higher burden of obesity among women[37].

### *Factors associated with obesity*

Living in urban areas and current tobacco consumption are factors associated with obesity or overweight among both genders. Van Der and all in Gambia[9], also noted that risk in urban areas was about 3 times higher than in rural areas (OR: 2.86, 95% CI: 1.89 - 4 , 35). Abubakari et al. in a meta-analysis of studies conducted in sub-Saharan Africa[11] also noted that the risk was higher in urban areas (OR: 2.70, 95% CI, 1.76-4.15). This high risk could be explained by more sedentary lifestyle in urban areas as previously mentioned. In addition, in urban areas, eating patterns are different from that of rural areaq with more sugar and fats rich food known as "urban" or "western" foods[8]. Current tobacco consumption was inversely associated with the occurrence of overweight or obesity within both genders. Results from other studies reported that smoking for a long period tends to lead to weight loss. Similarly, cessation of tobacco consumption goes along with weight gain[38,39]. However, because smoking is an exposure with well-known detrimental consequences on health, the observed association between smoking and overweight/obesity shouldn't be interpreted as being in favor of smoking as a strategy to prevent obesity/overweight.

Other factors associated with overweight or obesity among men were age, marital status, consumption of butter /lard / margarine, and physical activity. Several authors also reported a positive association between the risk of obesity and age [12,15,33]. Aging leads to less physical activity and combined with greater socio-economic status, increase the ability to access diverse foods. The use of butter / fat / margarine as the main source of lipid was inversely associated with obesity in our data. This is an unexpected result as one would expect a lower risk of



1  
2  
3 overweight and obesity among those that use predominantly vegetable oil. The lack of  
4 quantification of the consumption of the different types of oil makes difficult the comparison.  
5  
6 Physical activity was associated with significant decrease in the odds of obesity only in men  
7  
8 and not in women in our data. Other studies carried out by Pasquet et al. in Cameroon[14] and  
9  
10 Oladimeji in Nigeria[16] revealed that the practice of intensive physical activity reduces  
11  
12 significantly the risk of obesity.

13  
14 Indeed, the intensive physical activity leads to an increase in the energy expenditure, avoids fat  
15  
16 deposition and promotes a development of the muscular mass [40]. Men living in union were  
17  
18 about 60% more likely to be obese compared to single men. There was an association in the  
19  
20 same direction in women. There is a correlation between marital status and socio-economic  
21  
22 position. In our study, we lack data on the socio-economic status and we used education status  
23  
24 as a proxy. Our findings of a positive correlation between being married and overweight/obesity  
25  
26 may have been confounded by the socio-economic status.

27  
28 Among women, education was associated with obesity/overweight. However, in their study  
29  
30 among women living in urban areas, Benkeser et al. in Ghana [37] did not find a relation  
31  
32 between educational level and obesity. This could be explained by the fact that their study was  
33  
34 exclusively carried out in urban areas where the heterogeneity between educational statuses  
35  
36 may be lesser. We found difference in predictors of overweight/obesity between men and  
37  
38 women. Physical activity and age were significant predictors in men and not in women, while  
39  
40 the education status and the type of employment were significant predictors in only women.  
41  
42 These results are in favor of gender specific predictors for overweight/obesity and are in support  
43  
44 of gender-based stratified analyses.

### 45 46 *Limitations of the study*

47  
48 The results reported in this study are derived from a cross sectional study limiting our ability to  
49  
50 derive causal inferences from the observed associations. Exposures measurements were mainly  
51  
52 based on a short window recall as it is usual in this type of studies, hampering the possibility to  
53  
54 get further attributes (quantity, duration etc.) on some exposures such as fat and fruit  
55  
56 consumptions, that would have been invaluable in the interpretation of the results. We did not  
57  
58 have information on socio-economic status that is a known key variable when trying to predict  
59  
60 overnutrition. Furthermore, the analysis carried out and our interpretation of the results assume  
61  
62 that an overweight person is in transition to obese status. While this is conceptually true, we

1  
2  
3 cannot rule out that an overweight person will turn to be normal in the future, particularly in a  
4 setting where food insecurity is common.  
5  
6

## 7 **Conclusion**

8  
9 Our study showed an important burden of obesity and overweight in the adult population with  
10 women more affected than men. Overnutrition needs to be recognized as an important public  
11 health issue. The country is witnessing the double burden of malnutrition with the coexistence  
12 of overnutrition and undernutrition. Nutrition interventions need to be reshaped to account for  
13 this epidemiological picture of malnutrition in Burkina Faso.  
14  
15  
16  
17  
18  
19  
20

## 21 **Abbreviations**

22  
23 BMI: body mass index; CI: confidence interval; CPOR : Crude proportional odds ratio ;  
24 APOR : Adjusted proportional odds ratio ; WHO : World health organization.  
25  
26  
27

## 28 **Acknowledgements**

29  
30 This research was carried out by SK as partial fulfilment of his master program in public health  
31 at the African Institute of Public Health. SK was granted funds by the Ministry of Health of  
32 Burkina Faso for his master's program.  
33  
34  
35

36 The authors are grateful to the Ministry of Health for giving access to the data. We would also  
37 like to thank the African Institute of Public Health for the logistic support to the drafting of the  
38 article.  
39  
40  
41

## 42 **Funding**

43  
44 This work is a secondary analysis of data from the STEPS survey. Authors didn't receive  
45 funding for this work.  
46  
47

## 48 **Data sharing and availability**

49  
50 The STEPS 2013 survey database was used for this study. The dataset can be obtained at the  
51 Ministry of Health upon reasonable request. Any request for further analysis can be submitted  
52 to Dr Brice W. Bicaba [bicaba\\_brico@yahoo.fr](mailto:bicaba_brico@yahoo.fr)  
53  
54  
55

56 No further additional data is available.  
57  
58  
59  
60

### Authors contribution

SK1, MT and SK2 designed the study and SK1 drafted the paper. SK1 and MT performed initial analysis and MT reanalysed the data. SK2, BB, JKS and HL made substantial contributions to the interpretation of the data. All authors read and approved the final manuscript.

### Conflicts of interest

None declared

### Consent for publication

Not applicable.

### Ethical considerations

The STEPS survey got approval from the Ethics Committee for Health Research (Deliberation No. 2012-12-092 of 05 December 2012). Written informed consent was obtained before inclusion in the study. For this study, we obtained an authorization from the General directorate of Health to reanalyze the data and the confidentiality of study participants was preserved.

### Figure legend

Figure 1: Diagram flow of the study participants. This figure shows the criteria that were used to select the study participants in our study and the numbers that were affected by these criteria and the final sample size of the study.

## References

1. Organisation mondiale de la Santé. OMS | Obésité [Internet]. WHO. World Health Organization; [cité 3 août 2020]. Disponible sur: <https://www.who.int/topics/obesity/fr/>
2. World Health Organization. Obesity: Preventing and managing the global epidemic. Geneva: World Health Organization; 2000.
3. DELPEUCH E, MAIRE B. Obésité et développement des pays du sud. *Med Trop*. 1997;57(4):380-8.
4. Ashkan A, Mohammad F, Marissa R, Patrick S, Kara E, Alex L, et al. Health Effects of Overweight and Obesity in 195 Countries over 25 Years. *N Engl J Med*. 6 juill 2017;377(1):13-27.
5. OMS | Obésité et surpoids [Internet]. WHO. Disponible sur: <http://www.who.int/>
6. Ali H M, Charbel El B, Ashkan A, Raghid C, Ibrahim K, Maziar M-L, et al. Burden of obesity in the Eastern Mediterranean Region: findings from the Global Burden of Disease 2015 study. *Int J Public Health*. 2018;63(Suppl 1):165-76.
7. Melaku YA, Gill TK, Taylor AW, Appleton SL, Gonzalez-Chica D, Adams R, et al. Trends of mortality attributable to child and maternal undernutrition, overweight/obesity and dietary risk factors of non-communicable diseases in sub-Saharan Africa, 1990-2015: findings from the Global Burden of Disease Study 2015. *Public Health Nutr*. avr 2019;22(5):827-40.
8. Zeba ANZ. Transition nutritionnelle et double fardeau de la malnutrition chez des adultes de Ouagadougou au Burkina Faso (Afrique de l'Ouest) [PhD]. [Canada]: Université de Montreal; 2012.
9. Van der Sande MAB, Bailey R, Faal H, Banya WAS, Dolin P, Nyan OA, et al. Nationwide prevalence study of hypertension and related non-communicable diseases in The Gambia. *Trop Med Int Health*. nov 1997;2(11):1039-48.
10. Njelekela M, Ikeda K, Mtabaji J, Yamori Y. Obesity and other risk factors for cardiovascular diseases among Africans: results from CARDIAC study in Tanzania. *Int Congr Ser*. mai 2004;1262:372-5.
11. Abubakari AR, Lauder W, Agyemang C, Jones M, Kirk A, Bhopal RS. Prevalence and time trends in obesity among adult West African populations: a meta-analysis. *Obes Rev*. juill 2008;9(4):297-311.
12. Sagna Y. Obesity and Metabolic Syndrome in a Burkina Faso Urban Area: Prevalence, Associated Factors and Comorbidities. *J Nutr Disord Ther*. nov 2014;04(02).
13. Fezeu L. Association between socioeconomic status and adiposity in urban Cameroon. *Int J Epidemiol*. 4 juill 2005;35(1):105-11.

14. Pasquet P, Temgoua LS, Melaman-Sego F, Froment A, Rikong-Adié H. Prevalence of overweight and obesity for urban adults in Cameroon. *Ann Hum Biol.* janv 2003;30(5):551-62.
15. Maruf FA, Udoji NV. Prevalence and Socio-Demographic Determinants of Overweight and Obesity in a Nigerian Population. *J Epidemiol.* 2015;25(7):475-81.
16. Oladimeji AM, Fawole O, Nguku P, Nsubuga P. Prevalence and factors associated with hypertension and obesity among civil servants in Kaduna, Kaduna State, June 2012. *Pan Afr Med J.* 2014;18(Suppl 1).
17. Tene Marceline Y. Obesity, Central Obesity, Overweight and Diabetes: Women are the Most Affected in Burkina Faso. *J Womens Health Care.* 2014;03(03).
18. Pessinaba S, Yayehd K, Pio M, Baragou R, Afassinou Y, Tchérou T, et al. L'obésité en consultation cardiologique à Lomé: prévalence et facteurs de risque cardio-vasculaire associés-étude chez 1200 patients. *Pan Afr Med J.* 2013;12(1).
19. Mabilia-Babela J-R, Sabaye Alima J, Monabeka HG, Mbika Cardorelle A, Nkoua J-L, Moyon G. Profil épidémiologique et clinique de l'obésité de l'enfant à Brazzaville (Congo). *Cah Nutr Diététique.* nov 2011;46(5):259-62.
20. Koueta F, Dao L, Dao F, Djekompté S, Sawadogo J, Diarra Y, et al. Facteurs associés au surpoids et à l'obésité des élèves de Ouagadougou (Burkina Faso). *Santé.* 2011;21(4):5.
21. Kramoh KE, N'goran YNK, Aké-Traboulsi E, Boka BC, Harding DE, Koffi DBJ, et al. Prévalence de l'obésité en milieu scolaire en Côte d'Ivoire. *Ann Cardiol Angéiologie.* juin 2012;61(3):145-9.
22. Msyamboza KP, Kathyola D, Dzewela T. Anthropometric measurements and prevalence of underweight, overweight and obesity in adult Malawians: nationwide population based NCD STEPS survey. *Pan Afr Med J [Internet].* 24 juill 2013 [cité 12 mars 2017];15. Disponible sur: <http://www.ncbi.nlm.nih.gov/pmc/articles/PMC3828071/>
23. Institut National de la démographie. Recensement général de la population et de l'habitation de 2006. Burkina Faso; 2008. 52 p.
24. Ministère de la Santé. Projections démographiques de 2011 à 2020 des régions et districts sanitaires du Burkina Faso.
25. Ministère de la santé. Annuaire statistique 2014. Burkina Faso; 2015 p. 330.
26. Ministère de la Santé. Rapport de l'enquête nutritionnelle nationale. Burkina Faso; 2019 p. 32.
27. Organisation mondiale de la Santé. Profils des pays pour les maladies non transmissibles (MNT), 2016.

- 1  
2  
3 28. Kish L. A Procedure for Objective Respondent Selection within the  
4 Household. *J Am Stat Assoc.* sept 1949;44(247):380-7.  
5
- 6 29. Millogo T, Bicaba BW, Soubeiga JK, Dabiré E, Médah I, Kouanda S. Diabetes  
7 and abnormal glucose regulation in the adult population of Burkina Faso:  
8 prevalence and predictors. *BMC Public Health.* déc 2018;18(1):350.  
9
- 10 30. World Health Organization. Waist circumference and waist-hip ratio: report  
11 of a WHO expert consultation, Geneva, 8-11 December 2008. Geneva: World  
12 Health Organization; 2011.  
13
- 14 31. Adebayo RA, Balogun MO, Adedoyin RA, Obashoro-John OA, Bisiriyu LA,  
15 Abiodun OO. Prevalence and pattern of overweight and obesity in three rural  
16 communities in southwest Nigeria. *Diabetes Metab Syndr Obes Targets Ther.* 10  
17 mai 2014;7:153-8.  
18
- 19 32. Kamadjeu RM, Edwards R, Atanga JS, Kiawi EC, Unwin N, Mbanya J-C.  
20 Anthropometry measures and prevalence of obesity in the urban adult  
21 population of Cameroon: an update from the Cameroon Burden of Diabetes  
22 Baseline Survey. *BMC Public Health.* 2006;6(1):228.  
23
- 24 33. Kirunda BE, Fadnes LT, Wamani H, Van den Broeck J, Tylleskär T.  
25 Population-based survey of overweight and obesity and the associated factors in  
26 peri-urban and rural Eastern Uganda. *BMC Public Health.* 2015;15(1):1168.  
27
- 28 34. Gomes A, Damasceno A, Azevedo A, Prista A, Silva-Matos C, Saranga S, et al.  
29 Body mass index and waist circumference in Mozambique: urban/rural gap  
30 during epidemiological transition. *Obes Rev Off J Int Assoc Study Obes.* sept  
31 2010;11(9):627-34.  
32
- 33 35. Saeed KMI. Prevalence and associated risk factors for obesity in Jalalabad  
34 city - Afghanistan. *Alex J Med.* janv 2015;  
35
- 36 36. Cai L, He J, Song Y, Zhao K, Cui W. Association of obesity with socio-  
37 economic factors and obesity-related chronic diseases in rural southwest China.  
38 *Public Health.* mars 2013;127(3):247-51.  
39
- 40 37. Benkeser RM, Biritwum R, Hill AG. Prevalence of Overweight and Obesity and  
41 Perception of Healthy and Desirable Body Size in Urban, Ghanaian Women.  
42 *Ghana Med J.* juin 2012;46(2):66-75.  
43
- 44 38. Weg MWV, Klesges RC, DeBon M. Relationship Between Smokeless Tobacco  
45 Use and Body Weight in Young Adult Military Recruits. *Nicotine Tob Res.* 1 avr  
46 2005;7(2):301-5.  
47
- 48 39. Rodu B, Stegmayr B, Nasic S, Cole P, Asplund K. The influence of smoking  
49 and smokeless tobacco use on weight amongst men. *J Intern Med.* janv  
50 2004;255(1):102-7.  
51  
52  
53  
54  
55  
56  
57  
58  
59  
60

- 1  
2  
3 40. Tremblay A, Therrien F. Physical activity and body functionality:  
4 implications for obesity prevention and treatment. Can J Physiol Pharmacol.  
5 févr 2006;84(2):149-56.  
6  
7  
8  
9  
10  
11  
12  
13  
14  
15  
16  
17  
18  
19  
20  
21  
22  
23  
24  
25  
26  
27  
28  
29  
30  
31  
32  
33  
34  
35  
36  
37  
38  
39  
40  
41  
42  
43  
44  
45  
46  
47  
48  
49  
50  
51  
52  
53  
54  
55  
56  
57  
58  
59  
60

For peer review only

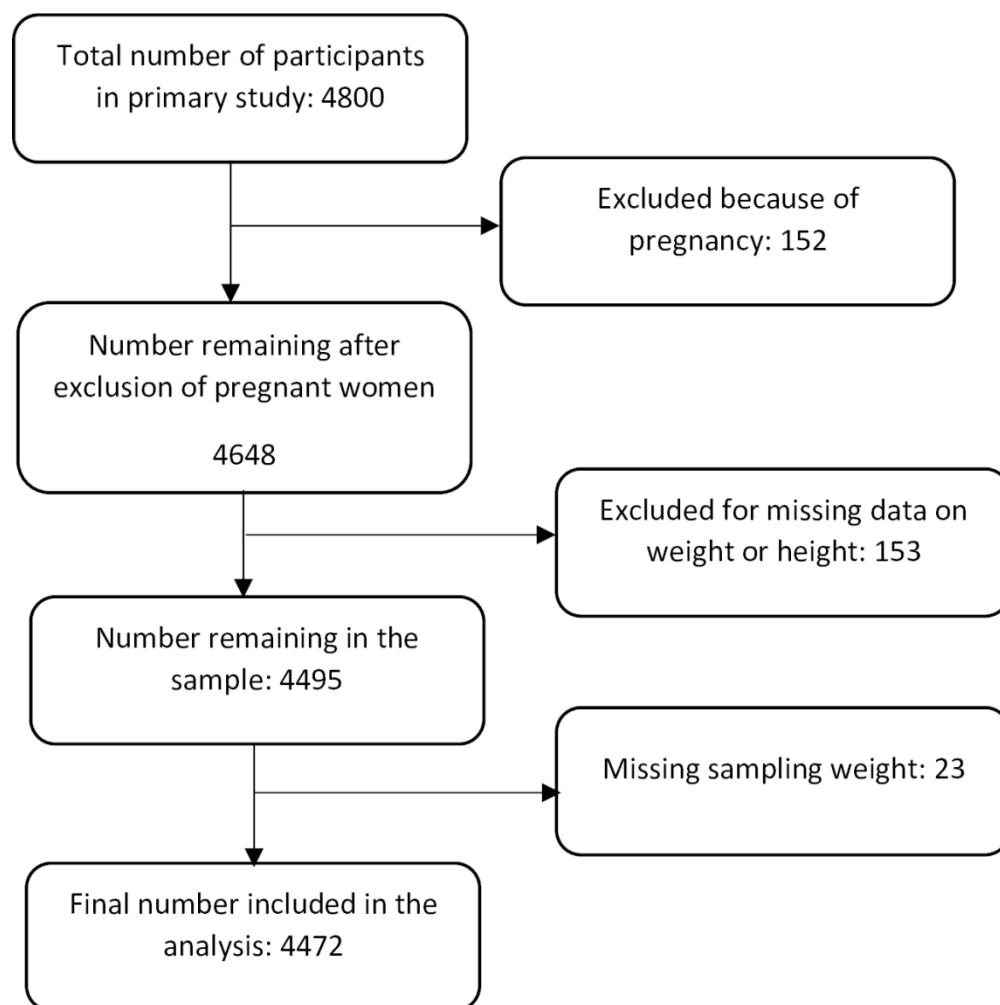

Figure 1 : Diagram flow of the study participants.

Diagram flow of the study participants

111x126mm (300 x 300 DPI)



STROBE Statement—Checklist of items that should be included in reports of *cross-sectional studies*

|                              | Item No | Recommendation                                                                                                                                                                                    | Page No     |
|------------------------------|---------|---------------------------------------------------------------------------------------------------------------------------------------------------------------------------------------------------|-------------|
| <b>Title and abstract</b>    | 1       | (a) Indicate the study's design with a commonly used term in the title or the abstract                                                                                                            | 1           |
|                              |         | (b) Provide in the abstract an informative and balanced summary of what was done and what was found                                                                                               | 2           |
| <b>Introduction</b>          |         |                                                                                                                                                                                                   |             |
| Background/rationale         | 2       | Explain the scientific background and rationale for the investigation being reported                                                                                                              | 4           |
| Objectives                   | 3       | State specific objectives, including any prespecified hypotheses                                                                                                                                  | 2&4         |
| <b>Methods</b>               |         |                                                                                                                                                                                                   |             |
| Study design                 | 4       | Present key elements of study design early in the paper                                                                                                                                           | 5           |
| Setting                      | 5       | Describe the setting, locations, and relevant dates, including periods of recruitment, exposure, follow-up, and data collection                                                                   | 5           |
| Participants                 | 6       | (a) Give the eligibility criteria, and the sources and methods of selection of participants                                                                                                       | 5&6         |
| Variables                    | 7       | Clearly define all outcomes, exposures, predictors, potential confounders, and effect modifiers. Give diagnostic criteria, if applicable                                                          | 7&8         |
| Data sources/<br>measurement | 8*      | For each variable of interest, give sources of data and details of methods of assessment (measurement). Describe comparability of assessment methods if there is more than one group              | 8           |
| Bias                         | 9       | Describe any efforts to address potential sources of bias                                                                                                                                         | 7&8         |
| Study size                   | 10      | Explain how the study size was arrived at                                                                                                                                                         | 6           |
| Quantitative variables       | 11      | Explain how quantitative variables were handled in the analyses. If applicable, describe which groupings were chosen and why                                                                      | 8           |
| Statistical methods          | 12      | (a) Describe all statistical methods, including those used to control for confounding                                                                                                             | 9           |
|                              |         | (b) Describe any methods used to examine subgroups and interactions                                                                                                                               | 9           |
|                              |         | (c) Explain how missing data were addressed                                                                                                                                                       | 9           |
|                              |         | (d) If applicable, describe analytical methods taking account of sampling strategy                                                                                                                | 9           |
|                              |         | (e) Describe any sensitivity analyses                                                                                                                                                             | None        |
| <b>Results</b>               |         |                                                                                                                                                                                                   |             |
| Participants                 | 13*     | (a) Report numbers of individuals at each stage of study—eg numbers potentially eligible, examined for eligibility, confirmed eligible, included in the study, completing follow-up, and analysed | 7& figure 1 |
|                              |         | (b) Give reasons for non-participation at each stage                                                                                                                                              | 7& figure 1 |
|                              |         | (c) Consider use of a flow diagram                                                                                                                                                                | Figure 1    |
| Descriptive data             | 14*     | (a) Give characteristics of study participants (eg demographic, clinical, social) and information on exposures and potential confounders                                                          | 9&10        |
|                              |         | (b) Indicate number of participants with missing data for each variable of interest                                                                                                               | 10          |

|                          |     |                                                                                                                                                                                                              |               |
|--------------------------|-----|--------------------------------------------------------------------------------------------------------------------------------------------------------------------------------------------------------------|---------------|
| Outcome data             | 15* | Report numbers of outcome events or summary measures                                                                                                                                                         | 10&11         |
| Main results             | 16  | (a) Give unadjusted estimates and, if applicable, confounder-adjusted estimates and their precision (eg, 95% confidence interval). Make clear which confounders were adjusted for and why they were included | 11&12&13&14   |
|                          |     | (b) Report category boundaries when continuous variables were categorized                                                                                                                                    | 10            |
|                          |     | (c) If relevant, consider translating estimates of relative risk into absolute risk for a meaningful time period                                                                                             | None included |
| Other analyses           | 17  | Report other analyses done—eg analyses of subgroups and interactions, and sensitivity analyses                                                                                                               | 11-15         |
| <b>Discussion</b>        |     |                                                                                                                                                                                                              |               |
| Key results              | 18  | Summarise key results with reference to study objectives                                                                                                                                                     | 16            |
| Limitations              | 19  | Discuss limitations of the study, taking into account sources of potential bias or imprecision. Discuss both direction and magnitude of any potential bias                                                   | 3&16          |
| Interpretation           | 20  | Give a cautious overall interpretation of results considering objectives, limitations, multiplicity of analyses, results from similar studies, and other relevant evidence                                   | 16            |
| Generalisability         | 21  | Discuss the generalisability (external validity) of the study results                                                                                                                                        | 16&17         |
| <b>Other information</b> |     |                                                                                                                                                                                                              |               |
| Funding                  | 22  | Give the source of funding and the role of the funders for the present study and, if applicable, for the original study on which the present article is based                                                | 18            |

\*Give information separately for exposed and unexposed groups.

**Note:** An Explanation and Elaboration article discusses each checklist item and gives methodological background and published examples of transparent reporting. The STROBE checklist is best used in conjunction with this article (freely available on the Web sites of PLoS Medicine at <http://www.plosmedicine.org/>, Annals of Internal Medicine at <http://www.annals.org/>, and Epidemiology at <http://www.epidem.com/>). Information on the STROBE Initiative is available at [www.strobe-statement.org](http://www.strobe-statement.org).

# BMJ Open

## Prevalence and risk factors for Overweight and obesity: a cross sectional countrywide study in Burkina Faso

|                                 |                                                                                                                                                                                                                                                                                                                                                                                                                                                                                                                                                                                    |
|---------------------------------|------------------------------------------------------------------------------------------------------------------------------------------------------------------------------------------------------------------------------------------------------------------------------------------------------------------------------------------------------------------------------------------------------------------------------------------------------------------------------------------------------------------------------------------------------------------------------------|
| Journal:                        | <i>BMJ Open</i>                                                                                                                                                                                                                                                                                                                                                                                                                                                                                                                                                                    |
| Manuscript ID                   | bmjopen-2019-032953.R4                                                                                                                                                                                                                                                                                                                                                                                                                                                                                                                                                             |
| Article Type:                   | Original research                                                                                                                                                                                                                                                                                                                                                                                                                                                                                                                                                                  |
| Date Submitted by the Author:   | 15-Oct-2020                                                                                                                                                                                                                                                                                                                                                                                                                                                                                                                                                                        |
| Complete List of Authors:       | Kaboré, Seydou; African Institute of Public Health; Ministry of Health Burkina Faso,<br>Millogo, Tieba; African Institute of Public Health; Institut de Recherche en Sciences de la Sante<br>Soubeiga, Joseph; African Institute of Public Health; Ministry of Health Burkina Faso<br>Lanou, Hermann; Institut de Recherche en Sciences de la Sante; African Institute of Public Health<br>Bicaba, Brice; African Institute of Public Health; Ministry of Health Burkina Faso<br>Kouanda, Seni; Institut de Recherche en Sciences de la Santé; African Institute of Public Health, |
| <b>Primary Subject Heading</b>: | Epidemiology                                                                                                                                                                                                                                                                                                                                                                                                                                                                                                                                                                       |
| Secondary Subject Heading:      | Nutrition and metabolism                                                                                                                                                                                                                                                                                                                                                                                                                                                                                                                                                           |
| Keywords:                       | nutritionnal epidemiology, EPIDEMIOLOGY, NUTRITION & DIETETICS                                                                                                                                                                                                                                                                                                                                                                                                                                                                                                                     |
|                                 |                                                                                                                                                                                                                                                                                                                                                                                                                                                                                                                                                                                    |

SCHOLARONE™  
Manuscripts



I, the Submitting Author has the right to grant and does grant on behalf of all authors of the Work (as defined in the below author licence), an exclusive licence and/or a non-exclusive licence for contributions from authors who are: i) UK Crown employees; ii) where BMJ has agreed a CC-BY licence shall apply, and/or iii) in accordance with the terms applicable for US Federal Government officers or employees acting as part of their official duties; on a worldwide, perpetual, irrevocable, royalty-free basis to BMJ Publishing Group Ltd ("BMJ") its licensees and where the relevant Journal is co-owned by BMJ to the co-owners of the Journal, to publish the Work in this journal and any other BMJ products and to exploit all rights, as set out in our [licence](#).

The Submitting Author accepts and understands that any supply made under these terms is made by BMJ to the Submitting Author unless you are acting as an employee on behalf of your employer or a postgraduate student of an affiliated institution which is paying any applicable article publishing charge ("APC") for Open Access articles. Where the Submitting Author wishes to make the Work available on an Open Access basis (and intends to pay the relevant APC), the terms of reuse of such Open Access shall be governed by a Creative Commons licence – details of these licences and which [Creative Commons](#) licence will apply to this Work are set out in our licence referred to above.

Other than as permitted in any relevant BMJ Author's Self Archiving Policies, I confirm this Work has not been accepted for publication elsewhere, is not being considered for publication elsewhere and does not duplicate material already published. I confirm all authors consent to publication of this Work and authorise the granting of this licence.

1  
2  
3 **Prevalence and risk factors for overweight and obesity: a cross sectional**  
4 **countrywide study in Burkina Faso.**  
5  
6  
7  
8  
9

10 **Authors**

11 1. Seydou Kaboré, PharmD, MPH

12 Institut Africain de santé publique & Ministère de la Santé, Ouagadougou, Burkina Faso  
13 [seydoupfarm@yahoo.fr](mailto:seydoupfarm@yahoo.fr)

14 2. Tieba Millogo, MD, MSc, PhD (c)

15 Institut Africain de santé publique & Institut de Recherche en Sciences de la Santé,  
16 Ouagadougou, Burkina Faso  
17 [millogorod@gmail.com](mailto:millogorod@gmail.com)

18 3. Joseph Kouesyandé Soubeiga, MD, MPH

19 Ministère de la Santé, Ouagadougou, Burkina Faso  
20 [ksoubeiga@yahoo.fr](mailto:ksoubeiga@yahoo.fr)

21 4. Hermann Lanou, MD, MSc, PhD (c)

22 Institut Africain de santé publique & Institut de Recherche en Sciences de la Santé,  
23 Ouagadougou, Burkina Faso  
24 [hlanou@yahoo.ca](mailto:hlanou@yahoo.ca)

25 5. Brice W Bicaba , MD, MPH.

26 Ministry of Health, Burkina Faso  
27 [bicaba\\_brico@yahoo.fr](mailto:bicaba_brico@yahoo.fr)

28 6. Seni Kouanda, MD, MSc., PhD

29 Institut Africain de santé publique & Institut de Recherche en Sciences de la Santé,  
30 Ouagadougou, Burkina Faso  
31 [skouanda@irss.bf](mailto:skouanda@irss.bf)

32 **Corresponding Author**

33 Seni Kouanda

34 [skouanda@irss.bf](mailto:skouanda@irss.bf)

35 Institut Africain de santé publique, Deputy Director

36 PBox: 12 BP 199 Ouagadougou

37 Tel: (+226) 70261462  
38  
39  
40  
41  
42  
43  
44  
45  
46  
47  
48  
49  
50  
51  
52  
53  
54  
55  
56  
57  
58  
59  
60

1  
2  
3 **Word count:** 2929  
4

5 **Keywords:** Obesity, epidemiology of non-communicable disease, low-middle-income  
6 countries  
7

8  
9 **Abstract**  
10

11 **Objective:** The objective of this study was to determine the prevalence and predictors of  
12 overweight and obesity in Burkina Faso using a population-based country-wide sample. We  
13 hypothesize that there is a significant burden related to overweight/obesity in Burkina Faso.  
14

15  
16  
17 **Design:** Secondary analysis of a population-based country wide cross-sectional study  
18

19  
20 **Setting:** Burkina Faso, all the 13 regions including both rural and urban residential areas  
21

22 **Participants:** 4,800 participants of both sexes, aged between 25 and 64 years.  
23

24 **Main outcomes:** overweight and obesity using body mass index cut-off levels of WHO  
25

26  
27 **Results:** The prevalence of overweight and obesity in Burkina Faso were 13.82% (CI95%:  
28 12.25 - 15.55) and 4.84% (CI95%:3.99 - 5.86) respectively. Among men, the proportional odds  
29 of overweight / obesity increase with urban residency ( $p<0.001$ ), greater age ( $p<0.002$ ), marital  
30 status different from single ( $p\leq 0.007$ ) and decrease with current smoking ( $p=0.009$ ). Among  
31 women, the proportional odds of overweight / obesity increase with urban residency ( $p<0.001$ ),  
32 primary educational level ( $p=0.01$ ), high total blood cholesterol level ( $p<0.001$ ), high fasting  
33 blood glucose level ( $p=0.02$ ), and decrease with current smoking ( $p<0.001$ ).  
34  
35  
36  
37  
38

39  
40 **Conclusion:**  
41

42 Our study showed that nearly one person out of five in the adult population of Burkina has an  
43 abnormal weight status with women being more affected than men. Urban residency is a  
44 consistent risk factor in both men and women. Alcohol consumption and education were  
45 associated with an increased odds in only women. Overnutrition needs to be recognized as an  
46 important public health issue in Burkina Faso and nutrition interventions need to be reshaped  
47 to account for it.  
48  
49  
50  
51  
52  
53  
54  
55  
56  
57  
58  
59  
60

## Strengths and limitations

### *Strengths*

- To our best knowledge, this is the first nationwide study on obesity and overweight in Burkina Faso with a country level representative sample.
- Outcomes measurements were carried out following international standards through the WHO STEPwise approach to NCDs measurement and prevention.

### *Limitations*

- This is a cross sectional study, which hampers our ability to derive causal inferences from the reported data;
- The Socio-economic status, a known relevant variable was not measured in the primary study;
- Being overweight may not necessarily equate to being an obese person to be, particularly in a setting where food insecurity is common.

## Introduction

Obesity is defined as an abnormal or excessive accumulation of body fat, due to an energy imbalance between intake and expenditure [1]. It is a major risk factor for many non-communicable diseases (NCD) and a real public health threat in the world[2,3]. In 2015, high BMI contributed to 4.0 million deaths, which represented 7.1% of the deaths from all causes [4].

Obesity, a well-known phenomenon in developed countries, is increasingly common in low-middle income countries, affecting both children and adults [2,4,5]. In the Eastern Mediterranean Region, the prevalence of obesity increased in adults from 15.1% in 1980 to 20.7% in 2015. It increased from 4.1% to 4.9% in the same period among children [6]. In sub-Saharan Africa (SSA), Overweight/obesity factors accounted for 266 768 deaths, representing 3.3% of all-cause mortality [7]. Thus, in low- and middle-income countries, the association of overweight / obesity with one or more nutritional deficiencies is often observed, especially among women and known as double burden of malnutrition [8]. However, data from the literature reports that excess weight can largely be avoided; and prevention involves the identification and control of modifiable risk factors[2,5]. These factors have been widely described in the literature. There are mainly related to behavior and / or knowledge (inadequate diet, inactivity, alcohol consumption,), sociodemographic factors (place of residence, socio-economic status), and clinical and metabolic factors (total cholesterol level, HDL, triglycerides) [5,9–11].

However, the factors vary between countries, depending on eating habits and socio-cultural practices [2] . This variability of factors suggests a relevance of country specific studies to identify context specific and relevant risk factors in order to better guide and align the policies and strategies aiming to address the raising burden of obesity.

The studies conducted so far on factors associated with overweight or obesity in low-middle income countries were often conducted in urban areas [[12–16], hospitals[17,18], secondary and high schools [19–21]. There are few nationally representative data on obesity in most sub-Saharan African countries[9,22]. This scarcity of nationally representative data on the burden and risk factors for overweight/obesity is an obstacle to engaging countries in the design and implementation of adequate public health interventions.



1  
2  
3 Our study intends to fill this gap by providing more complete data on the prevalence and the  
4 risk factors for overweight and obesity, through a secondary analysis of data from the STEPS  
5 survey carried out in Burkina Faso in 2013.  
6  
7

## 8 9 **Methods**

### 10 11 ***Study setting***

12  
13  
14 Our study was conducted in Burkina Faso, a landlocked Sahelian country in the heart of West  
15 Africa. The country is divided into 13 regions, 45 provinces and 351 municipalities. In 2013,  
16 the population was estimated at 21,478,529 inhabitants. The majority of the population lives in  
17 rural areas, with agriculture and livestock as main activities[23,24].  
18  
19

20  
21 In terms of health, the country is still facing endemic-epidemic diseases, especially malaria,  
22 measles, cerebro-spinal meningitis, acute respiratory infections, diarrheal diseases and HIV /  
23 AIDS infection[25]. The prevalence of acute malnutrition in children under five years was  
24 estimated at 8.1% in 2019[26].  
25  
26

27  
28 Mortality due to non-communicable diseases is increasing rapidly in the same time; it was  
29 estimated that 33% of all death cases were due to NCD in 2016[27].  
30  
31  
32  
33

### 34 35 ***Type of study***

36 We carried out an analytical cross-sectional study consisting of a secondary analysis of the data  
37 from the 2013 STEPS survey in Burkina Faso.  
38  
39  
40  
41

### 42 43 ***Study population***

44  
45 The study population of the survey was composed of adults of 25 to 64-year-old who have been  
46 living in the national territory for at least six (6) months before the survey. Persons with an  
47 inability to answer questions (cognitive impairment) were excluded from the primary study.  
48 Pregnant women were excluded from our analysis.  
49  
50  
51  
52  
53

### 54 55 ***Sampling and statistical power***

56  
57 The enumeration areas (EAs) from the 2006 General Population and Housing Census , updated  
58 in 2010 during the Demographic and Health Survey conducted in Burkina Faso (EDS-BF, 2010)  
59 were used as sampling frame. The STEPS survey was carried out on a nationally representative  
60

1  
2  
3 sample of 4800 households with 20 households per EAs, giving 240 EAs for the whole country.  
4 The sample was stratified in each of the 13 administrative regions to provide an adequate  
5 representation of the urban and rural areas. This stratification took into account the distribution  
6 of the population depending on the urban (22.7%) and rural environment (77.3%) in Burkina  
7 Faso, giving 54 EAs for urban area and 186 EAs for rural areas across the country. Within each  
8 stratum, a three-stage cluster sampling was done as recommended by WHO for STEPS NCD  
9 risk factors screening surveys.

10  
11  
12 At the first stage, the choice of clusters or enumeration zones by administrative regions was  
13 made by a systematic draw with proportional probability to the size of the EAs.

14  
15  
16 At the second stage, a household count in each of the selected 240 clusters at the first stage  
17 provided a list of households from which a sample of 20 households was selected using a simple  
18 systematic random sampling with an Excel Spread Sheet.

19  
20  
21 At the third level, the choice of individuals within households was made randomly. Once a  
22 household is selected, the interviewer creates a listing (sampling frame) of all eligible adults of  
23 both sexes aged between 25-64 years in the household. The listing includes the following  
24 variables: name, gender, relationship to the household head and age. Once the listing is created,  
25 each eligible member is assigned a unique number. Then using a randomized response table  
26 (Kish table), a particular member is chosen for the interview [28]. In each household, an  
27 individual of 25 to 64 years old living in the household was drawn to participate in the survey.

28  
29  
30 The STEPS survey took place from September 26 to November 18, 2013 and enrolled a total  
31 of 4,800 individuals. Out of the 4800 participants, we excluded 152 pregnant women, 153 with  
32 missing data (on height and / or weight) and 23 without sampling weights. The sample size for  
33 our secondary analysis comprised 4472 persons (See figure1 for study inclusion process).  
34 With this final sample size and assuming a prevalence of obesity of 4.5%, our study has a  
35 statistical power of 86.6% to detect an association of a magnitude of 1.5 with the type-I error  
36 rate  $\alpha$  of 5%.

### 37 38 39 *Data collection*

40  
41  
42 The collection of data was carried out by nurses, graduate medical and nurse students. The data  
43 collection consisted in face-to-face interviews of selected participants using standardized  
44 questionnaires and physical and biochemical measurements. The data collection tools were pre-  
45 tested before they were used at the national level.  
46  
47  
48  
49  
50  
51  
52  
53  
54  
55  
56  
57  
58  
59  
60

Data collection teams were closely supervised by a team of supervisors composed of statisticians, epidemiologists and clinicians.

Height measurement (in cm) was made in a standing or lying position, using a portable measuring board, on the participant without shoes and hat. The weight in kg was measured using an electronic weighing scales (SECA™) placed on a stable and even surface, the person lightly dressed, shoes-off and in a standing position.

The total cholesterol and blood glucose levels were measured using a Cardiocheck™ PA SILVER kit that performs all these measurements using a capillary whole blood sample. Further details on the STEPS survey are available elsewhere[29].

### **Study Variables**

We used body mass index (BMI) to define general obesity. The BMI was calculated dividing the weight (kg) by the size (in meters) squared and then used to define undernutrition (BMI <18.5 kg / m<sup>2</sup>), normal (18.5 - 24.99 kg / m<sup>2</sup>), overweight (25.0-29.99 kg / m<sup>2</sup>) and obesity (30 kg / m<sup>2</sup>) in accordance with WHO recommendations [2]. We also used waist circumference to compute central obesity with the cut-off points of 94 cm in men and 80 cm in women[30].

Independent variables included age, marital status, place of residence, occupational activity, educational level, total cholesterol level, fasting blood glucose, smoking, alcohol consumption, the type of fat most commonly consumed and the intensity of physical activities. Some variables were recoded using specific cut-points of grouping (see Table 1).

Table 1 : Recoding of exposure variables

| <b>Variables</b>          | <b>Categories</b>                                                                                                                                                                                                            |
|---------------------------|------------------------------------------------------------------------------------------------------------------------------------------------------------------------------------------------------------------------------|
| Age groups (years)        | «25 to 34» «35 to 44» «45 to 54» «55 to 64»                                                                                                                                                                                  |
| Education level           | «None» «Primary» «Secondary and higher»                                                                                                                                                                                      |
| Marital status            | «Single» «Cohabiting/Married» «Divorced/widowed/ separated»                                                                                                                                                                  |
| Occupational status       | «Employed» «self-employed» «Unemployed» «House makers »                                                                                                                                                                      |
| Total cholesterol level   | Normal (<5.2 mmol/l); High cholesterol (≥5.2 mmol/l)                                                                                                                                                                         |
| Fasting capillary glucose | Normal (<6.1 mmol/l); High glucose (≥6.1 mmol/l)                                                                                                                                                                             |
| Cigarette smoking         | « Never » «Current smoker » « Former smoker » « Second hand smoking »                                                                                                                                                        |
| Daily alcohol consumption | <ul style="list-style-type: none"> <li>• Male : None (0 g) Low (0.01 – 39.99 g) Medium (40 - 59.99) High (60 and over)</li> <li>• Female : None (0 g) Low (0.01 – 19.99 g) Medium (20 - 39.99) High (40 and over)</li> </ul> |
| Fat intake                | «None» «Vegetable oil» « butter, lard or fat, margarine»                                                                                                                                                                     |
| Physical activity         | <ul style="list-style-type: none"> <li>• High intensity activity: high intensity activities require an energy expenditure greater than 6 Metabolic</li> </ul>                                                                |

---

equivalent of Task (METs). Examples include soccer playing, hole digging, regular swimming, farming etc.

- Moderate intensity activity: moderate intensity activities require an energy expenditure of approximately 3–6 METs. Examples include cleaning, vacuuming, polishing, gardening, cycling at a regular pace or horse riding etc.

- Low intensity activity: refers to persons who do not meet the above classifications. Here are included people with limited and no physical activity.

---

### ***Statistical analysis***

The predictive variables were selected based on the literature. We carried out stratified gender based analyzes. The Fisher Test was used to evaluate associations between the dependent variable and independent qualitative variables. We calculated crude proportional odds ratio (CPOR) and adjusted proportional odds ratios (APORs) using an ordinal logistic regression model. The dependant ordinal variable has four categories: underweight, normal, overweight and obese. The covariates selection in the multivariable analysis was based on epidemiological plausibility and literature review. All the analyses were weighted to account for the study design and we computed robust standard errors to account for the clustered nature of the data. The proportional risk assumption and the overall goodness of fit of the final models were checked before the results were reported. All the analyses were based on complete data analysis (missing data were ignored in all analyses). All analyzes were carried out using the Stata 13.1 software.

### ***Patient and public involvement***

Patients or the public WERE NOT involved in the design, or conduct, or reporting, or dissemination plans of our research.

## **Results**

### ***Background characteristics of the study sample***

The socio-demographic characteristics of the individuals of the sample are presented in Table 2. Participants of the 25-34 age group were majority with 40.92%. There were 2249 women, which represents 52.6% of the participants. Participants with no educational level accounted for 72.93% among men against 77.17% among women. The majority of the individuals were married/living in couple (86.96%).

Table 2 : Demographic and behavioural characteristics of study participants.

| Variables                     | Population   |              | Total        |
|-------------------------------|--------------|--------------|--------------|
|                               | Male n(%)    | Female n(%)  |              |
| <b>Residence</b>              |              |              |              |
| Urban                         | 454 (25.52)  | 539 (29.70)  | 993 (27.72)  |
| Rural                         | 1769 (74.48) | 1710 (70.30) | 3479 (72.28) |
| <b>Age groups</b>             |              |              |              |
| 25 - 34                       | 933 (38.09)  | 1044 (43.45) | 1977 (40.92) |
| 35 - 44                       | 560 (28.21)  | 573 (37.65)  | 1133 (27.91) |
| 45 - 54                       | 424 (20.22)  | 404 (18.49)  | 828 (19.31)  |
| 55 - 64                       | 306 (13.48)  | 228 (10.40)  | 534 (11.86)  |
| <b>Education level</b>        |              |              |              |
| None                          | 1623 (72.93) | 1832 (81.16) | 3455 (77.27) |
| Primary                       | 405 (17.85)  | 288 (13.07)  | 693 (15.33)  |
| Secondary (school) and higher | 187 (9.22)   | 129 (5.78)   | 316 (7.40)   |
| <b>Marital status</b>         |              |              |              |
| Single                        | 254 (11.04)  | 68 (3.24)    | 322 (6.93)   |
| Cohabiting/Married            | 1879 (85.74) | 1963 (88.06) | 3842 (86.96) |
| Divorced/Widowed/separated    | 87 (3.21)    | 216 (8.70)   | 303 (6.10)   |
| <b>Occupational status</b>    |              |              |              |
| Employed                      | 178 (6.68)   | 71 (3.44)    | 249 (2.92)   |
| Self-employed                 | 1945 (86.12) | 1188 (50.40) | 3133 (67.32) |
| Unemployed                    | 87 (4.51)    | 54 (2.44)    | 141 (3.42)   |
| Housemaker                    | 13 (0.70)    | 936 (43.72)  | 949 (23.34)  |

### ***Prevalence of overweight and obesity***

As shown in Table 3, the prevalence of overweight and general obesity in the sample were respectively 13.82 (CI<sub>95%</sub>: 12.25 - 15.55) and 4.84 (CI<sub>95%</sub>: 3.99 - 5.86). The prevalence of general obesity was higher among women ( $p < 0.0001$ ) and among urban residents ( $p < 0.0001$ ). However, the proportion of overweight people did not significantly differ between women and men. Among all age groups, obesity was more prevalent in the age group 35 to 44 ( $p < 0.0001$ ). The prevalence of obesity also varies across administrative regions (results not shown). The prevalence of central obesity was respectively 6.33% (CI<sub>95%</sub>: 5.11-7.81) and 34.50% (CI<sub>95%</sub>: 31.12-38.97) in men and women, with significant rural versus urban difference in both sexes ( $p < 0.001$ ).

**Tableau 3 : Prevalence of underweight, overweight and general obesity among study participants.**

|                           | n           | Underweight % (95% CI)       | Overweight % (95% CI)        | Obesity % (95% CI)        |
|---------------------------|-------------|------------------------------|------------------------------|---------------------------|
| <b>Gender</b>             |             |                              |                              |                           |
| Male                      | 2223        | 8.10 (6.71 - 97.3)           | 13.91 (11.88 -16.22)         | 3.29 (2.33 - 4.62)        |
| Female                    | 2249        | 15.05 (13.19 - 17.12)        | 13.74 (11.86 -15.86)         | 6.24 (5.11 - 7.60)        |
| <b>Age groups (years)</b> |             |                              |                              |                           |
| 25 - 34                   | 1977        | 9.32 (7.76 - 11.17)          | 12.09 (10.22 - 14.24)        | 3.73 (2.69 - 5.16)        |
| 35 - 44                   | 1133        | 10.77 (8.70 - 13.25)         | 16.12 (13.35 - 19.34)        | 5.64 (4.26 - 7.43)        |
| 45 - 54                   | 828         | 14.05 (11.63 - 16.89)        | 15.75 (12.79 -19.24)         | 5.26 (3.61 - 7.61)        |
| 55 - 64                   | 534         | 18.75 (15.04 - 23.13)        | 11.22 (8.36 - 14.90)         | 6.10 (3.97 - 9.24)        |
| <b>Residence</b>          |             |                              |                              |                           |
| Rural                     | 3479        | 13.32 (11.79 - 15.03)        | 9.74 (8.33 - 11.35)          | 1.89 (1.40 - 2.53)        |
| Urban                     | 993         | 7.67 (5.09 - 11.42)          | 24.46 (20.06 - 29.47)        | 12.54 (9.75- 15.99)       |
| <b>Total</b>              | <b>4472</b> | <b>11.76 (10.40 - 13.27)</b> | <b>13.82 (12.25 - 15.55)</b> | <b>4.84 (3.99 - 5.86)</b> |

### ***Risk factors for Obesity and overweight***

#### **Among men.**

In multivariable analysis, significant predictors of overweight and obesity among men included place of residence, physical activity, age, marital status, alcohol, tobacco and fat consumption. Men living in urban areas were around 3 times proportionally more likely to be at least overweight as compared to those living in rural areas (APOR: 2.84, CI<sub>95%</sub>: 1.90 - 4.23). The odds of being overweight or obese was lower within the 25 to 34 age group as compared to 35-44 years and 45-54 years. Men aged 35 to 44 years were 1.4 times proportionally more likely to be overweight or obese (APOR: 1.4, CI<sub>95%</sub>: 1.00 – 1.90). Compared to single men, men living in unions and those that are widowed or divorced were having higher proportional odds of being overweight or obese (APOR: 1.62, CI<sub>95%</sub>: 1.09 - 2.42 and APOR: 1.83, CI<sub>95%</sub>: 0.76 - 4.39). The current consumption of tobacco reduces by nearly half the proportional odds (APOR: 0.53, CI<sub>95%</sub>: 0.37 - 0.74). No significant difference was found between former and second hand smokers and men who had never smoked. The report of the consumption of butter, lard or margarine as the most often type of fat was associated with more than 30% proportional odds reduction (APOR: 0.62, CI<sub>95%</sub>: 0.39 - 0.97). The practice of physical activity was also associated with lower odds of overweight/obesity with the odds reduction increasing as the intensity of the physical activity increases (APOR: 0.68, CI<sub>95%</sub>: 0.44-1.04 and APOR: 0.62, CI<sub>95%</sub>: 0.42-0.93).

### Among women

Among women, significant risk factors included urban residence, current tobacco consumption, educational level, the type of occupation and fat consumption. Urban residential status was associated with around three-fold increase in the proportional odds of obesity or overweight (APOR 2.67, CI<sub>95%</sub>:1.89 - 3.78) as compared to rural residence. Being of primary school education level increased nearly two times the proportional odds of overweight or obesity (APOR: 1.80, CI<sub>95%</sub>:1.26-2.57) as compared to those that have not been at school (no education). The proportional odds of being at least overweight was lower among current tobacco smokers compared to non-smokers (APOR: 0.42, CI<sub>95%</sub>: 0.29 - 0.60). As compared to wage earners, women that are self-employed and those that house makers were less likely to be overweight/obese (APOR:0.45, CI<sub>95%</sub>:0.24-0.87 and APOR:0.40, CI<sub>95%</sub>:0.21-0.77). The report of butter/lard or margarine as type of fat often consumed was associated with lower odds of overweight/obesity (APOR:0.67, CI<sub>95%</sub>:0.46-0.99).

The results of the multivariable analysis are presented in Table 4.



Table 4: Risk factors for overweight and obesity among male and female adult population aged 25–64

|                                | Male (n=2223)      |         |                   |         | Female (n=2249)   |         |                   |         |
|--------------------------------|--------------------|---------|-------------------|---------|-------------------|---------|-------------------|---------|
|                                | CPOR (95% CI)      | p-value | APOR (95% CI)     | p-value | CPOR (95% CI)     | p-value | APOR (95% CI)     | p-value |
| <b>Residence area</b>          |                    |         |                   |         |                   |         |                   |         |
| Rural                          | 1.00               |         | 1.00              |         | 1.00              |         | 1.00              |         |
| Urban                          | 3.97 (2.93 -5.38)  | 0.000   | 2.84 (1.90 -4.23) | 0.000   | 3.83 (3.72 -6.28) | 0.000   | 2.67 (1.89 -3.78) | 0.000   |
| <b>Age (years)</b>             |                    |         |                   |         |                   |         |                   |         |
| 25 – 34                        | 1.00               |         | 1.00              |         | 1.00              |         | 1.00              |         |
| 35 – 44                        | 1.96 (1.39 - 2.78) | 0.000   | 1.40 (1.00 -1.90) | 0.049   | 1.29 (0.97 -1.73) | 0.081   | 1.19 (0.89 -1.59) | 0.239   |
| 45 – 54                        | 1.74 (1.18 - 2.56) | 0.005   | 1.20 (0.81 -1.65) | 0.412   | 1.46 (1.04 -2.07) | 0.030   | 1.18 (0.87 -1.61) | 0.287   |
| 55 – 64                        | 1.42 (0.90 - 2.25) | 0.133   | 0.67 (0.43 -1.04) | 0.074   | 1.40 (0.87 -2.26) | 0.168   | 1.12 (0.70 -1.80) | 0.628   |
| <b>Education</b>               |                    |         |                   |         |                   |         |                   |         |
| None                           | 1.00               |         | 1.00              |         | 1.00              |         | 1.00              |         |
| Primary                        | 1.22 (0.82 -1.80)  | 0.320   | 1.07(0.75 -1.53)  | 0.708   | 2.92 (2.09 -4.09) | 0.000   | 1.80 (1.26 -2.57) | 0.001   |
| Secondary<br>(school) and over | 3.24 (2.12 -4.95)  | 0.000   | 1.39 (0.77 -2.48) | 0.271   | 4.07 (2.56 -6.46) | 0.000   | 1.57 (0.87 -2.80) | 0.131   |
| <b>Occupation</b>              |                    |         |                   |         |                   |         |                   |         |
| Wage earners                   | 1.00               |         | 1.00              |         | 1.00              |         | 1.00              |         |
| Self-employed                  | 0.28 (0.19 -0.43)  | 0.000   | 0.98 (0.53 -1.81) | 0.959   | 0.21 (0.12 -0.36) | 0.000   | 0.45 (0.24 -0.87) | 0.017   |



|                            |                   |       |                   |       |                   |       |                   |       |
|----------------------------|-------------------|-------|-------------------|-------|-------------------|-------|-------------------|-------|
| Unemployed                 | 0.51 (0.25 -1.02) | 0.057 | 0.75 (0.35 -1.60) | 0.458 | 0.57 (0.22 -1.45) | 0.236 | 0.42 (0.14 -1.27) | 0.123 |
| House maker                |                   |       |                   |       | 0.27 (0.16 -0.47) | 0.000 | 0.40 (0.21 -0.77) | 0.006 |
| <b>Marital status</b>      |                   |       |                   |       |                   |       |                   |       |
| Single                     | 1.00              |       | 1.00              |       | 1.00              |       | 1.00              |       |
| Cohabiting/Married         | 1.30 (0.81 -2.07) | 0.271 | 1.62 (1.09 -2.42) | 0.017 | 0.66 (0.31 -1.43) | 0.297 | (1.01 -4.16)      | 0.045 |
| Divorced/Widowed/<br>ed/   | 2.13 (0.96 -4.73) | 0.063 | 1.83 (0.76 -4.39) | 0.176 | 0.72 (0.31 -1.70) | 0.459 | 1.64 (0.73 -3.68) | 0.232 |
| <b>Tobacco consumption</b> |                   |       |                   |       |                   |       |                   |       |
| Never                      | 1.00              |       | 1.00              |       | 1.00              |       | 1.00              |       |
| Current smoker             | 0.64 (0.43 -0.95) | 0.027 | 0.53 (0.37 -0.74) | 0.000 | 0.20 (0.10 -0.37) | 0.000 | 0.42 (0.29 -0.60) | 0.000 |
| Former smoker              | 1.44 (0.77 -2.71) | 0.257 | 1.10 (0.59 -2.05) | 0.756 | 0.98 (0.18 -5.21) | 0.983 | 0.55 (0.13 -2.37) | 0.426 |
| Second hand smoking        | 1.27 (0.92 -1.75) | 0.151 | 1.11 (0.82 -1.50) | 0.506 | 1.30 (0.99 -1.71) | 0.056 | 1.14 (0.87 -1.48) | 0.347 |
| <b>Alcohol</b>             |                   |       |                   |       |                   |       |                   |       |
| None                       | 1.00              |       | 1.00              |       | 1.00              |       | 1.00              |       |
| Low                        | 1.04 (0.71 -1.51) | 0.856 | 0.96 (0.68 -1.35) | 0.811 | 0.47 (0.26 -0.85) | 0.012 | 0.69 (0.45 -1.05) | 0.081 |
| Medium                     | 1.69 (1.00 -2.82) | 0.047 | 1.87 (1.20 -2.93) | 0.006 | 1.44 (1.00 -2.07) | 0.047 | 1.17 (0.82 -1.68) | 0.386 |
| High                       | 1.52 (0.74 -3.13) | 0.257 | 1.38 (0.77 -2.46) | 0.276 | 1.21 (0.57 -2.59) | 0.620 | 0.71 (0.38 -1.32) | 0.280 |
| <b>Fat used</b>            |                   |       |                   |       |                   |       |                   |       |

1  
2  
3  
4  
5  
6  
7  
8  
9  
10  
11  
12  
13  
14  
15  
16  
17  
18  
19  
20  
21  
22  
23  
24  
25  
26  
27  
28  
29  
30  
31  
32  
33  
34  
35  
36  
37  
38  
39  
40  
41  
42  
43  
44  
45  
46

| None                           | 1.00              |       | 1.00              |       | 1.00              |       | 1.00              |       |
|--------------------------------|-------------------|-------|-------------------|-------|-------------------|-------|-------------------|-------|
| Vegetable oil                  | 1.10 (0.71 -1.71) | 0.658 | 0.85 (0.56 -1.30) | 0.461 | 2.00 (1.27 -3.18) | 0.03  | 1.04 (0.72 -1.52) | 0.829 |
| Butter, lard or fat, margarine | 0.48 (0.28 -0.81) | 0.006 | 0.62 (0.39 -0.97) | 0.037 | 0.73 (0.44 -1.23) | 0.240 | 0.67 (0.46 -0.99) | 0.045 |
| <b>Physical activity</b>       |                   |       |                   |       |                   |       |                   |       |
| Low intensity                  | 1.00              |       | 1.00              |       | 1.00              |       | 1.00              |       |
| Moderate intensity             | 0.58 (0.38 -0.90) | 0.016 | 0.68 (0.44 -1.04) | 0.076 | 0.76 (0.53 -1.10) | 0.147 | 0.94 (0.66 -1.33) | 0.581 |
| High intensity                 | 0.44 (0.30 -0.65) | 0.000 | 0.62 (0.42 -0.93) | 0.021 | 0.55 (0.39 -0.76) | 0.000 | 0.88 (0.63 -1.23) | 0.449 |

*CPOR : Crude proportional odds ratio ; APOR : Adjusted proportional odds ratio ; CI : Confidence interval*

## Discussion

### *Prevalence of overweight and obesity*

The overall prevalence of overweight was relatively high in our study, with no significant difference between men and women. Studies in Africa have also found similar prevalence among both sex[22,31]. However, some authors reported higher proportion of overweight among men[32–34]. The prevalence of obesity in our study was around 5% with disparities found across regions.

The prevalence of obesity was higher among women. Several other studies also reported higher prevalence of obesity among women[9,10,35,36]. Hormonal effects, especially among older ages, women's maternity and lifestyle, and certain cultural conceptions, may be contributing to this higher burden of obesity among women[37].

### *Factors associated with obesity*

Living in urban areas and current tobacco consumption are factors associated with obesity or overweight among both genders. Van Der and all in Gambia[9], also noted that risk in urban areas was about 3 times higher than in rural areas (OR: 2.86, 95% CI: 1.89 - 4 , 35). Abubakari et al. in a meta-analysis of studies conducted in sub-Saharan Africa[11] also noted that the risk was higher in urban areas (OR: 2.70, 95% CI, 1.76-4.15). This high risk could be explained by more sedentary lifestyle in urban areas as previously mentioned. In addition, in urban areas, eating patterns are different from that of rural areaq with more sugar and fats rich food known as "urban" or "western" foods[8]. Current tobacco consumption was inversely associated with the occurrence of overweight or obesity within both genders. Results from other studies reported that smoking for a long period tends to lead to weight loss. Similarly, cessation of tobacco consumption goes along with weight gain[38,39]. However, because smoking is an exposure with well-known detrimental consequences on health, the observed association between smoking and overweight/obesity shouldn't be interpreted as being in favor of smoking as a strategy to prevent obesity/overweight.

Other factors associated with overweight or obesity among men were age, marital status, consumption of butter /lard / margarine, and physical activity. Several authors also reported a positive association between the risk of obesity and age [12,15,33]. Aging leads to less physical activity and combined with greater socio-economic status, increase the ability to access diverse foods. The use of butter / fat / margarine as the main source of lipid was inversely associated with obesity in our data. This is an unexpected result as one would expect a lower risk of

1  
2  
3 overweight and obesity among those that use predominantly vegetable oil. The lack of  
4 quantification of the consumption of the different types of oil makes difficult the comparison.  
5  
6 Physical activity was associated with significant decrease in the odds of obesity only in men  
7  
8 and not in women in our data. Other studies carried out by Pasquet et al. in Cameroon[14] and  
9  
10 Oladimeji in Nigeria[16] revealed that the practice of intensive physical activity reduces  
11  
12 significantly the risk of obesity.

13  
14 Indeed, the intensive physical activity leads to an increase in the energy expenditure, avoids fat  
15  
16 deposition and promotes a development of the muscular mass [40]. Men living in union were  
17  
18 about 60% more likely to be obese compared to single men. There was an association in the  
19  
20 same direction in women. There is a correlation between marital status and socio-economic  
21  
22 position. In our study, we lack data on the socio-economic status and we used education status  
23  
24 as a proxy. Our findings of a positive correlation between being married and overweight/obesity  
25  
26 may have been confounded by the socio-economic status.

27  
28 Among women, education was associated with obesity/overweight. However, in their study  
29  
30 among women living in urban areas, Benkeser et al. in Ghana [37] did not find a relation  
31  
32 between educational level and obesity. This could be explained by the fact that their study was  
33  
34 exclusively carried out in urban areas where the heterogeneity between educational statuses  
35  
36 may be lesser. We found difference in predictors of overweight/obesity between men and  
37  
38 women. Physical activity and age were significant predictors in men and not in women, while  
39  
40 the education status and the type of employment were significant predictors in only women.  
41  
42 These results are in favor of gender specific predictors for overweight/obesity and are in support  
43  
44 of gender-based stratified analyses.

### 45 46 *Limitations of the study*

47  
48 The results reported in this study are derived from a cross sectional study limiting our ability to  
49  
50 derive causal inferences from the observed associations. Exposures measurements were mainly  
51  
52 based on a short window recall as it is usual in this type of studies, hampering the possibility to  
53  
54 get further attributes (quantity, duration etc.) on some exposures such as fat and fruit  
55  
56 consumptions, that would have been invaluable in the interpretation of the results. We did not  
57  
58 have information on socio-economic status that is a known key variable when trying to predict  
59  
60 overnutrition. Furthermore, the analysis carried out and our interpretation of the results assume  
61  
62 that an overweight person is in transition to obese status. While this is conceptually true, we

1  
2  
3 cannot rule out that an overweight person will turn to be normal in the future, particularly in a  
4 setting where food insecurity is common.  
5  
6

## 7 **Conclusion**

8  
9 Our study showed an important burden of obesity and overweight in the adult population with  
10 women more affected than men. Overnutrition needs to be recognized as an important public  
11 health issue. The country is witnessing the double burden of malnutrition with the coexistence  
12 of overnutrition and undernutrition. Nutrition interventions need to be reshaped to account for  
13 this epidemiological picture of malnutrition in Burkina Faso.  
14  
15  
16  
17  
18  
19  
20

## 21 **Abbreviations**

22  
23 BMI: body mass index; CI: confidence interval; CPOR : Crude proportional odds ratio ;  
24 APOR : Adjusted proportional odds ratio ; WHO : World health organization.  
25  
26  
27

## 28 **Acknowledgements**

29  
30 This research was carried out by SK as partial fulfilment of his master program in public health  
31 at the African Institute of Public Health. SK was granted funds by the Ministry of Health of  
32 Burkina Faso for his master's program.  
33  
34  
35

36 The authors are grateful to the Ministry of Health for giving access to the data. We would also  
37 like to thank the African Institute of Public Health for the logistic support to the drafting of the  
38 article.  
39  
40  
41

## 42 **Funding**

43  
44 This work is a secondary analysis of data from the STEPS survey. Authors didn't receive  
45 funding for this work.  
46  
47

## 48 **Data sharing and availability**

49  
50 The STEPS 2013 survey database was used for this study. The dataset can be obtained at the  
51 Ministry of Health upon reasonable request. Any request for further analysis can be submitted  
52 to Dr Brice W. Bicaba [bicaba\\_brico@yahoo.fr](mailto:bicaba_brico@yahoo.fr)  
53  
54  
55

56 No further additional data is available.  
57  
58  
59  
60

### Authors contribution

SK1, MT and SK2 designed the study and SK1 drafted the paper. SK1 and MT performed initial analysis and MT reanalysed the data. SK2, BB, JKS and HL made substantial contributions to the interpretation of the data. All authors read and approved the final manuscript.

### Conflicts of interest

None declared

### Consent for publication

Not applicable.

### Ethical considerations

The STEPS survey got approval from the Ethics Committee for Health Research (Deliberation No. 2012-12-092 of 05 December 2012). Written informed consent was obtained before inclusion in the study. For this study, we obtained an authorization from the General directorate of Health to reanalyze the data and the confidentiality of study participants was preserved.

### Figure legend

Figure 1: Diagram flow of the study participants. This figure shows the criteria that were used to select the study participants in our study and the numbers that were affected by these criteria and the final sample size of the study.

## References

1. Organisation mondiale de la Santé. OMS | Obésité [Internet]. WHO. World Health Organization; [cité 3 août 2020]. Disponible sur: <https://www.who.int/topics/obesity/fr/>
2. World Health Organization. Obesity: Preventing and managing the global epidemic. Geneva: World Health Organization; 2000.
3. DELPEUCH E, MAIRE B. Obésité et développement des pays du sud. *Med Trop*. 1997;57(4):380-8.
4. Ashkan A, Mohammad F, Marissa R, Patrick S, Kara E, Alex L, et al. Health Effects of Overweight and Obesity in 195 Countries over 25 Years. *N Engl J Med*. 6 juill 2017;377(1):13-27.
5. OMS | Obésité et surpoids [Internet]. WHO. Disponible sur: <http://www.who.int/>
6. Ali H M, Charbel El B, Ashkan A, Raghid C, Ibrahim K, Maziar M-L, et al. Burden of obesity in the Eastern Mediterranean Region: findings from the Global Burden of Disease 2015 study. *Int J Public Health*. 2018;63(Suppl 1):165-76.
7. Melaku YA, Gill TK, Taylor AW, Appleton SL, Gonzalez-Chica D, Adams R, et al. Trends of mortality attributable to child and maternal undernutrition, overweight/obesity and dietary risk factors of non-communicable diseases in sub-Saharan Africa, 1990-2015: findings from the Global Burden of Disease Study 2015. *Public Health Nutr*. avr 2019;22(5):827-40.
8. Zeba ANZ. Transition nutritionnelle et double fardeau de la malnutrition chez des adultes de Ouagadougou au Burkina Faso (Afrique de l'Ouest) [PhD]. [Canada]: Université de Montreal; 2012.
9. Van der Sande MAB, Bailey R, Faal H, Banya WAS, Dolin P, Nyan OA, et al. Nationwide prevalence study of hypertension and related non-communicable diseases in The Gambia. *Trop Med Int Health*. nov 1997;2(11):1039-48.
10. Njelekela M, Ikeda K, Mtabaji J, Yamori Y. Obesity and other risk factors for cardiovascular diseases among Africans: results from CARDIAC study in Tanzania. *Int Congr Ser*. mai 2004;1262:372-5.
11. Abubakari AR, Lauder W, Agyemang C, Jones M, Kirk A, Bhopal RS. Prevalence and time trends in obesity among adult West African populations: a meta-analysis. *Obes Rev*. juill 2008;9(4):297-311.
12. Sagna Y. Obesity and Metabolic Syndrome in a Burkina Faso Urban Area: Prevalence, Associated Factors and Comorbidities. *J Nutr Disord Ther*. nov 2014;04(02).

13. Fezeu L. Association between socioeconomic status and adiposity in urban Cameroon. *Int J Epidemiol*. 4 juill 2005;35(1):105-11.
14. Pasquet P, Temgoua LS, Melaman-Sego F, Froment A, Rikong-Adié H. Prevalence of overweight and obesity for urban adults in Cameroon. *Ann Hum Biol*. janv 2003;30(5):551-62.
15. Maruf FA, Udoji NV. Prevalence and Socio-Demographic Determinants of Overweight and Obesity in a Nigerian Population. *J Epidemiol*. 2015;25(7):475-81.
16. Oladimeji AM, Fawole O, Nguku P, Nsubuga P. Prevalence and factors associated with hypertension and obesity among civil servants in Kaduna, Kaduna State, June 2012. *Pan Afr Med J*. 2014;18(Suppl 1).
17. Tene Marceline Y. Obesity, Central Obesity, Overweight and Diabetes: Women are the Most Affected in Burkina Faso. *J Womens Health Care*. 2014;03(03).
18. Pessinaba S, Yayehd K, Pio M, Baragou R, Afassinou Y, Tchérou T, et al. L'obésité en consultation cardiologique à Lomé: prévalence et facteurs de risque cardio-vasculaire associés-étude chez 1200 patients. *Pan Afr Med J*. 2013;12(1).
19. Mabilia-Babela J-R, Sabaye Alima J, Monabeka HG, Mbika Cardorelle A, Nkoua J-L, Moyen G. Profil épidémiologique et clinique de l'obésité de l'enfant à Brazzaville (Congo). *Cah Nutr Diététique*. nov 2011;46(5):259-62.
20. Koueta F, Dao L, Dao F, Djekompté S, Sawadogo J, Diarra Y, et al. Facteurs associés au surpoids et à l'obésité des élèves de Ouagadougou (Burkina Faso). *Santé*. 2011;21(4):5.
21. Kramoh KE, N'goran YNK, Aké-Traboulsi E, Boka BC, Harding DE, Koffi DBJ, et al. Prévalence de l'obésité en milieu scolaire en Côte d'Ivoire. *Ann Cardiol Angéiologie*. juin 2012;61(3):145-9.
22. Msyamboza KP, Kathyola D, Dzewela T. Anthropometric measurements and prevalence of underweight, overweight and obesity in adult Malawians: nationwide population based NCD STEPS survey. *Pan Afr Med J [Internet]*. 24 juill 2013 [cité 12 mars 2017];15. Disponible sur: <http://www.ncbi.nlm.nih.gov/pmc/articles/PMC3828071/>
23. Institut National de la démographie. Recensement général de la population et de l'habitation de 2006. Burkina Faso; 2008. 52 p.
24. Ministère de la Santé. Projections démographiques de 2011 à 2020 des régions et districts sanitaires du Burkina Faso.
25. Ministère de la santé. Annuaire statistique 2014. Burkina Faso; 2015 p. 330.
26. Ministère de la Santé. Rapport de l'enquête nutritionnelle nationale. Burkina Faso; 2019 p. 32.



- 1  
2  
3 27. Organisation mondiale de la Santé. Profils des pays pour les maladies non  
4 transmissibles (MNT), 2016.
- 5  
6 28. Kish L. A Procedure for Objective Respondent Selection within the  
7 Household. *J Am Stat Assoc.* sept 1949;44(247):380-7.
- 8  
9 29. Millogo T, Bicaba BW, Soubeiga JK, Dabiré E, Médah I, Kouanda S. Diabetes  
10 and abnormal glucose regulation in the adult population of Burkina Faso:  
11 prevalence and predictors. *BMC Public Health.* déc 2018;18(1):350.
- 12  
13 30. World Health Organization. Waist circumference and waist-hip ratio: report  
14 of a WHO expert consultation, Geneva, 8-11 December 2008. Geneva: World  
15 Health Organization; 2011.
- 16  
17 31. Adebayo RA, Balogun MO, Adedoyin RA, Obashoro-John OA, Bisiriyu LA,  
18 Abiodun OO. Prevalence and pattern of overweight and obesity in three rural  
19 communities in southwest Nigeria. *Diabetes Metab Syndr Obes Targets Ther.* 10  
20 mai 2014;7:153-8.
- 21  
22 32. Kamadjeu RM, Edwards R, Atanga JS, Kiawi EC, Unwin N, Mbanya J-C.  
23 Anthropometry measures and prevalence of obesity in the urban adult  
24 population of Cameroon: an update from the Cameroon Burden of Diabetes  
25 Baseline Survey. *BMC Public Health.* 2006;6(1):228.
- 26  
27 33. Kirunda BE, Fadnes LT, Wamani H, Van den Broeck J, Tylleskär T.  
28 Population-based survey of overweight and obesity and the associated factors in  
29 peri-urban and rural Eastern Uganda. *BMC Public Health.* 2015;15(1):1168.
- 30  
31 34. Gomes A, Damasceno A, Azevedo A, Prista A, Silva-Matos C, Saranga S, et al.  
32 Body mass index and waist circumference in Mozambique: urban/rural gap  
33 during epidemiological transition. *Obes Rev Off J Int Assoc Study Obes.* sept  
34 2010;11(9):627-34.
- 35  
36 35. Saeed KMI. Prevalence and associated risk factors for obesity in Jalalabad  
37 city - Afghanistan. *Alex J Med.* janv 2015;
- 38  
39 36. Cai L, He J, Song Y, Zhao K, Cui W. Association of obesity with socio-  
40 economic factors and obesity-related chronic diseases in rural southwest China.  
41 *Public Health.* mars 2013;127(3):247-51.
- 42  
43 37. Benkeser RM, Biritwum R, Hill AG. Prevalence of Overweight and Obesity and  
44 Perception of Healthy and Desirable Body Size in Urban, Ghanaian Women.  
45 *Ghana Med J.* juin 2012;46(2):66-75.
- 46  
47 38. Weg MWV, Klesges RC, DeBon M. Relationship Between Smokeless Tobacco  
48 Use and Body Weight in Young Adult Military Recruits. *Nicotine Tob Res.* 1 avr  
49 2005;7(2):301-5.
- 50  
51 39. Rodu B, Stegmayr B, Nasic S, Cole P, Asplund K. The influence of smoking  
52 and smokeless tobacco use on weight amongst men. *J Intern Med.* janv  
53 2004;255(1):102-7.
- 54  
55  
56  
57  
58  
59  
60

- 1  
2  
3 40. Tremblay A, Therrien F. Physical activity and body functionality:  
4 implications for obesity prevention and treatment. Can J Physiol Pharmacol.  
5 févr 2006;84(2):149-56.  
6  
7  
8  
9  
10  
11  
12  
13  
14  
15  
16  
17  
18  
19  
20  
21  
22  
23  
24  
25  
26  
27  
28  
29  
30  
31  
32  
33  
34  
35  
36  
37  
38  
39  
40  
41  
42  
43  
44  
45  
46  
47  
48  
49  
50  
51  
52  
53  
54  
55  
56  
57  
58  
59  
60

For peer review only

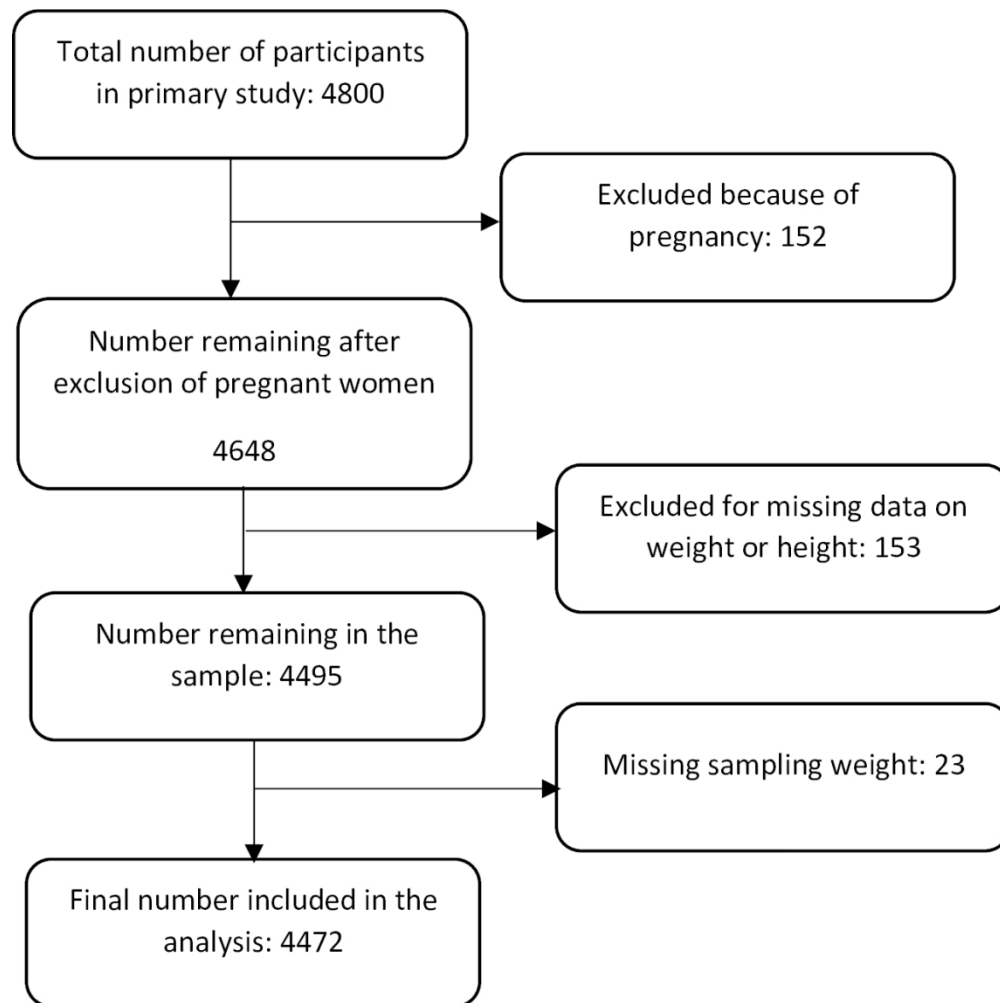

Figure 1 : Diagram flow of the study participants.

Diagram flow of the study participants. This figure shows the criteria that were used to select the study participants in our study and the numbers that were affected by these criteria and the final sample size of the study.

111x126mm (300 x 300 DPI)

STROBE Statement—Checklist of items that should be included in reports of *cross-sectional studies*

|                              | Item No | Recommendation                                                                                                                                                                                    | Page No     |
|------------------------------|---------|---------------------------------------------------------------------------------------------------------------------------------------------------------------------------------------------------|-------------|
| <b>Title and abstract</b>    | 1       | (a) Indicate the study's design with a commonly used term in the title or the abstract                                                                                                            | 1           |
|                              |         | (b) Provide in the abstract an informative and balanced summary of what was done and what was found                                                                                               | 2           |
| <b>Introduction</b>          |         |                                                                                                                                                                                                   |             |
| Background/rationale         | 2       | Explain the scientific background and rationale for the investigation being reported                                                                                                              | 4           |
| Objectives                   | 3       | State specific objectives, including any prespecified hypotheses                                                                                                                                  | 2&4         |
| <b>Methods</b>               |         |                                                                                                                                                                                                   |             |
| Study design                 | 4       | Present key elements of study design early in the paper                                                                                                                                           | 5           |
| Setting                      | 5       | Describe the setting, locations, and relevant dates, including periods of recruitment, exposure, follow-up, and data collection                                                                   | 5           |
| Participants                 | 6       | (a) Give the eligibility criteria, and the sources and methods of selection of participants                                                                                                       | 5&6         |
| Variables                    | 7       | Clearly define all outcomes, exposures, predictors, potential confounders, and effect modifiers. Give diagnostic criteria, if applicable                                                          | 7&8         |
| Data sources/<br>measurement | 8*      | For each variable of interest, give sources of data and details of methods of assessment (measurement). Describe comparability of assessment methods if there is more than one group              | 8           |
| Bias                         | 9       | Describe any efforts to address potential sources of bias                                                                                                                                         | 7&8         |
| Study size                   | 10      | Explain how the study size was arrived at                                                                                                                                                         | 6           |
| Quantitative variables       | 11      | Explain how quantitative variables were handled in the analyses. If applicable, describe which groupings were chosen and why                                                                      | 8           |
| Statistical methods          | 12      | (a) Describe all statistical methods, including those used to control for confounding                                                                                                             | 9           |
|                              |         | (b) Describe any methods used to examine subgroups and interactions                                                                                                                               | 9           |
|                              |         | (c) Explain how missing data were addressed                                                                                                                                                       | 9           |
|                              |         | (d) If applicable, describe analytical methods taking account of sampling strategy                                                                                                                | 9           |
|                              |         | (e) Describe any sensitivity analyses                                                                                                                                                             | None        |
| <b>Results</b>               |         |                                                                                                                                                                                                   |             |
| Participants                 | 13*     | (a) Report numbers of individuals at each stage of study—eg numbers potentially eligible, examined for eligibility, confirmed eligible, included in the study, completing follow-up, and analysed | 7& figure 1 |
|                              |         | (b) Give reasons for non-participation at each stage                                                                                                                                              | 7& figure 1 |
|                              |         | (c) Consider use of a flow diagram                                                                                                                                                                | Figure 1    |
| Descriptive data             | 14*     | (a) Give characteristics of study participants (eg demographic, clinical, social) and information on exposures and potential confounders                                                          | 9&10        |
|                              |         | (b) Indicate number of participants with missing data for each variable of interest                                                                                                               | 10          |

|                          |     |                                                                                                                                                                                                              |               |
|--------------------------|-----|--------------------------------------------------------------------------------------------------------------------------------------------------------------------------------------------------------------|---------------|
| Outcome data             | 15* | Report numbers of outcome events or summary measures                                                                                                                                                         | 10&11         |
| Main results             | 16  | (a) Give unadjusted estimates and, if applicable, confounder-adjusted estimates and their precision (eg, 95% confidence interval). Make clear which confounders were adjusted for and why they were included | 11&12&13&14   |
|                          |     | (b) Report category boundaries when continuous variables were categorized                                                                                                                                    | 10            |
|                          |     | (c) If relevant, consider translating estimates of relative risk into absolute risk for a meaningful time period                                                                                             | None included |
| Other analyses           | 17  | Report other analyses done—eg analyses of subgroups and interactions, and sensitivity analyses                                                                                                               | 11-15         |
| <b>Discussion</b>        |     |                                                                                                                                                                                                              |               |
| Key results              | 18  | Summarise key results with reference to study objectives                                                                                                                                                     | 16            |
| Limitations              | 19  | Discuss limitations of the study, taking into account sources of potential bias or imprecision. Discuss both direction and magnitude of any potential bias                                                   | 3&16          |
| Interpretation           | 20  | Give a cautious overall interpretation of results considering objectives, limitations, multiplicity of analyses, results from similar studies, and other relevant evidence                                   | 16            |
| Generalisability         | 21  | Discuss the generalisability (external validity) of the study results                                                                                                                                        | 16&17         |
| <b>Other information</b> |     |                                                                                                                                                                                                              |               |
| Funding                  | 22  | Give the source of funding and the role of the funders for the present study and, if applicable, for the original study on which the present article is based                                                | 18            |

\*Give information separately for exposed and unexposed groups.

**Note:** An Explanation and Elaboration article discusses each checklist item and gives methodological background and published examples of transparent reporting. The STROBE checklist is best used in conjunction with this article (freely available on the Web sites of PLoS Medicine at <http://www.plosmedicine.org/>, Annals of Internal Medicine at <http://www.annals.org/>, and Epidemiology at <http://www.epidem.com/>). Information on the STROBE Initiative is available at [www.strobe-statement.org](http://www.strobe-statement.org).
